# Supplementary material for: Prominent Role of Charge Transfer in the Spectral Tuning of Photosynthetic Light-Harvesting I Complex
Source: PubMed Central journal article supplement — ACS Phys Chem Au. 2024 Aug 5;4(5):499–509. doi: 10.1021/acsphyschemau.4c00022 (PMC11428290; doi:10.1021/acsphyschemau.4c00022), 2024-08-05
Supplement: pg4c00022_si_001.pdf [file pg4c00022_si_001.pdf]

# Supporting Information

## Prominent Role of Charge Transfer in the Spectral Tuning of Photosynthetic Light-Harvesting I Complex

Kazuhiro J. Fujimoto,<sup>1,2\*</sup> Rio Tsuji,<sup>2</sup> Zheng-Yu Wang-Otomo,<sup>3</sup> and Takeshi Yanai<sup>1,2\*</sup>

<sup>1</sup> *Institute of Transformative Bio-Molecules (WPI-ITbM), Nagoya University, Furocho, Chikusa,  
Nagoya 464-8601, Japan*

<sup>2</sup> *Department of Chemistry, Graduate School of Science, Nagoya University, Furocho, Chikusa,  
Nagoya, 464-8601, Japan*

<sup>3</sup> *Faculty of Science, Ibaraki University, Mito, 310-8512, Japan*

E-mail: fujimotok@chem.nagoya-u.ac.jp, yanait@chem.nagoya-u.ac.jp

**Table S1.** CI coefficients ( $C_{ia}$ ) of the excited state for the BChl  $a$  16-mer obtained using canonical Kohn–Sham orbitals.

|                               |    | virtual orbitals ( $\alpha$ ) |        |        |        |        |        |        |        |        |        |        |        |        |        |        |        |        |        |        |        |        |        |        |        |        |        |        |        |        |        |       |        |       |
|-------------------------------|----|-------------------------------|--------|--------|--------|--------|--------|--------|--------|--------|--------|--------|--------|--------|--------|--------|--------|--------|--------|--------|--------|--------|--------|--------|--------|--------|--------|--------|--------|--------|--------|-------|--------|-------|
|                               |    | 33                            | 34     | 35     | 36     | 37     | 38     | 39     | 40     | 41     | 42     | 43     | 44     | 45     | 46     | 47     | 48     | 49     | 50     | 51     | 52     | 53     | 54     | 55     | 56     | 57     | 58     | 59     | 60     | 61     | 62     | 63    | 64     |       |
| occupied orbitals ( $\beta$ ) | 1  | 0.003                         | 0.001  | 0.001  | 0.002  | 0.000  | 0.000  | 0.000  | 0.000  | 0.000  | 0.000  | 0.000  | 0.000  | 0.000  | -0.048 | -0.021 | -0.017 | 0.000  | 0.011  | 0.001  | 0.001  | 0.000  | 0.000  | 0.000  | 0.000  | 0.000  | -0.001 | 0.000  | 0.000  | 0.000  | 0.000  | 0.000 | 0.000  |       |
|                               | 2  | 0.000                         | 0.000  | 0.000  | 0.001  | 0.000  | 0.001  | 0.000  | 0.000  | 0.000  | 0.000  | 0.000  | 0.000  | 0.000  | 0.000  | 0.020  | 0.013  | -0.042 | 0.000  | -0.004 | 0.000  | 0.000  | 0.000  | 0.000  | 0.000  | 0.000  | 0.000  | 0.000  | 0.000  | 0.000  | 0.000  | 0.000 | 0.000  |       |
|                               | 3  | 0.000                         | -0.002 | -0.001 | -0.003 | 0.000  | 0.000  | 0.000  | 0.000  | 0.000  | 0.000  | 0.000  | 0.000  | 0.000  | 0.000  | -0.022 | 0.035  | -0.002 | 0.000  | 0.007  | 0.001  | 0.002  | 0.000  | 0.000  | 0.000  | 0.000  | 0.000  | 0.000  | 0.000  | 0.000  | 0.000  | 0.000 | 0.000  |       |
|                               | 4  | 0.001                         | -0.001 | 0.002  | 0.001  | 0.000  | 0.000  | 0.000  | 0.000  | 0.000  | 0.000  | 0.000  | 0.000  | 0.000  | 0.000  | -0.015 | -0.003 | 0.001  | 0.000  | -0.035 | 0.003  | -0.004 | 0.000  | -0.002 | -0.002 | 0.000  | 0.000  | 0.000  | 0.000  | 0.000  | 0.000  | 0.000 | 0.000  |       |
|                               | 5  | 0.000                         | 0.000  | 0.000  | 0.000  | 0.000  | -0.003 | 0.000  | 0.002  | 0.000  | 0.000  | 0.000  | 0.000  | 0.000  | 0.000  | -0.001 | 0.002  | -0.002 | 0.000  | -0.001 | 0.015  | 0.012  | -0.005 | 0.000  | 0.000  | 0.000  | 0.000  | 0.000  | 0.000  | 0.000  | 0.000  | 0.000 | 0.000  |       |
|                               | 6  | -0.001                        | -0.001 | 0.001  | 0.000  | -0.005 | 0.000  | 0.001  | 0.000  | 0.000  | 0.000  | 0.000  | 0.000  | 0.000  | 0.000  | -0.002 | 0.000  | 0.000  | 0.000  | -0.005 | -0.027 | 0.033  | 0.000  | 0.001  | 0.001  | 0.000  | 0.000  | 0.000  | 0.000  | 0.000  | 0.000  | 0.000 | 0.000  |       |
|                               | 7  | 0.000                         | 0.000  | 0.000  | 0.000  | 0.002  | 0.000  | 0.000  | 0.000  | -0.002 | 0.000  | 0.000  | 0.000  | 0.000  | 0.000  | 0.000  | 0.000  | 0.000  | 0.000  | 0.000  | -0.004 | 0.005  | 0.000  | -0.011 | 0.003  | 0.000  | 0.000  | 0.000  | 0.000  | 0.000  | -0.001 | 0.000 | 0.000  |       |
|                               | 8  | 0.000                         | 0.000  | 0.000  | 0.000  | 0.000  | 0.000  | 0.000  | -0.001 | 0.000  | 0.000  | 0.000  | 0.000  | 0.000  | 0.000  | 0.000  | 0.000  | 0.000  | 0.000  | 0.004  | 0.003  | 0.032  | 0.000  | 0.000  | 0.000  | -0.001 | 0.000  | 0.000  | 0.000  | 0.000  | 0.000  | 0.000 | 0.000  |       |
|                               | 9  | 0.000                         | 0.000  | 0.000  | 0.000  | 0.001  | 0.000  | -0.001 | 0.000  | 0.001  | 0.000  | 0.000  | 0.000  | 0.000  | 0.000  | 0.000  | 0.000  | 0.000  | 0.000  | 0.000  | -0.001 | 0.002  | 0.000  | 0.013  | -0.015 | 0.000  | 0.000  | 0.001  | 0.000  | 0.000  | 0.001  | 0.000 | 0.000  |       |
|                               | 10 | -0.051                        | -0.014 | -0.081 | -0.177 | 0.077  | -0.019 | -0.003 | 0.003  | -0.002 | 0.000  | 0.000  | 0.000  | 0.000  | 0.000  | 0.002  | 0.001  | 0.002  | 0.000  | -0.001 | 0.003  | 0.000  | 0.000  | 0.000  | 0.000  | 0.000  | 0.000  | -0.002 | 0.000  | 0.000  | 0.000  | 0.000 | 0.000  |       |
|                               | 11 | -0.086                        | -0.082 | 0.135  | -0.062 | -0.074 | -0.022 | 0.009  | 0.005  | 0.006  | 0.000  | 0.000  | 0.000  | 0.000  | 0.001  | 0.001  | 0.001  | 0.000  | 0.004  | 0.000  | 0.001  | 0.000  | -0.001 | -0.001 | 0.000  | 0.000  | -0.001 | 0.000  | 0.000  | 0.000  | 0.000  | 0.000 | 0.000  |       |
|                               | 12 | 0.023                         | 0.196  | 0.107  | -0.011 | 0.019  | -0.061 | -0.003 | 0.017  | -0.002 | -0.001 | 0.000  | 0.000  | 0.000  | -0.001 | -0.001 | 0.000  | 0.000  | -0.002 | 0.002  | 0.002  | 0.000  | 0.000  | 0.001  | 0.000  | 0.001  | 0.000  | 0.000  | 0.000  | 0.000  | 0.000  | 0.000 | 0.000  |       |
|                               | 13 | 0.000                         | 0.000  | 0.000  | 0.000  | 0.000  | 0.000  | 0.000  | 0.001  | 0.000  | 0.000  | 0.000  | 0.001  | 0.000  | 0.000  | 0.000  | 0.000  | 0.000  | 0.000  | 0.000  | 0.000  | 0.002  | 0.000  | 0.000  | 0.000  | 0.000  | 0.000  | -0.007 | 0.000  | 0.000  | 0.001  | 0.000 | 0.000  |       |
|                               | 14 | -0.307                        | 0.052  | -0.121 | 0.042  | -0.013 | -0.014 | 0.002  | 0.007  | -0.002 | -0.001 | 0.000  | 0.000  | 0.000  | 0.000  | -0.001 | 0.000  | 0.000  | 0.000  | 0.001  | 0.001  | 0.002  | 0.000  | 0.000  | 0.000  | 0.000  | 0.000  | 0.000  | 0.001  | 0.000  | 0.000  | 0.000 | 0.000  |       |
|                               | 15 | -0.001                        | 0.000  | 0.000  | 0.000  | 0.001  | 0.000  | 0.002  | 0.000  | -0.001 | 0.000  | 0.000  | 0.000  | 0.000  | 0.000  | 0.000  | 0.000  | 0.000  | 0.000  | 0.000  | 0.000  | 0.000  | 0.002  | -0.001 | 0.000  | 0.000  | -0.001 | 0.000  | 0.000  | 0.000  | 0.000  | 0.000 | 0.000  |       |
|                               | 16 | -0.070                        | 0.119  | 0.063  | -0.044 | -0.001 | 0.084  | 0.000  | -0.054 | 0.001  | 0.007  | 0.000  | 0.000  | 0.000  | 0.000  | 0.000  | 0.000  | 0.000  | 0.000  | 0.001  | -0.001 | -0.001 | -0.001 | 0.000  | 0.000  | 0.000  | -0.001 | 0.000  | 0.000  | 0.000  | 0.000  | 0.000 | 0.000  |       |
|                               | 17 | 0.105                         | 0.103  | -0.113 | -0.032 | -0.140 | 0.000  | 0.027  | 0.001  | 0.038  | 0.000  | 0.001  | 0.000  | 0.000  | 0.000  | 0.000  | 0.000  | 0.000  | 0.000  | 0.001  | -0.001 | 0.001  | 0.000  | 0.002  | 0.001  | 0.000  | 0.000  | 0.000  | 0.000  | 0.000  | 0.000  | 0.000 | 0.000  |       |
|                               | 18 | 0.040                         | 0.045  | -0.051 | -0.016 | -0.086 | 0.001  | 0.025  | 0.000  | -0.052 | 0.000  | -0.006 | 0.000  | 0.001  | 0.000  | 0.000  | 0.000  | 0.000  | 0.000  | 0.001  | -0.001 | 0.000  | 0.000  | -0.002 | -0.003 | 0.000  | 0.000  | 0.000  | 0.000  | 0.000  | 0.001  | 0.000 | 0.000  |       |
|                               | 19 | 0.000                         | 0.000  | 0.000  | 0.000  | 0.000  | 0.000  | 0.000  | 0.000  | 0.000  | 0.000  | 0.000  | 0.000  | 0.000  | 0.000  | 0.000  | 0.000  | 0.000  | 0.000  | 0.000  | 0.000  | 0.000  | 0.000  | 0.000  | 0.000  | 0.000  | 0.000  | -0.001 | 0.000  | 0.000  | -0.016 | 0.000 | 0.000  |       |
|                               | 20 | -0.012                        | 0.027  | 0.019  | -0.017 | 0.001  | 0.093  | 0.000  | 0.130  | 0.000  | -0.043 | 0.000  | 0.004  | 0.000  | 0.000  | 0.000  | 0.000  | 0.000  | 0.000  | 0.000  | -0.001 | -0.001 | -0.001 | 0.000  | 0.000  | 0.000  | -0.001 | 0.000  | 0.000  | 0.000  | 0.000  | 0.000 | 0.000  |       |
|                               | 21 | 0.011                         | 0.014  | -0.017 | -0.006 | -0.047 | 0.000  | -0.111 | 0.000  | 0.005  | 0.000  | 0.012  | 0.000  | -0.001 | 0.000  | 0.000  | 0.000  | 0.000  | 0.000  | 0.000  | 0.000  | 0.000  | 0.000  | 0.000  | 0.000  | 0.000  | 0.000  | 0.000  | 0.000  | 0.000  | -0.001 | 0.000 | 0.000  |       |
|                               | 22 | 0.000                         | 0.000  | 0.000  | 0.000  | 0.001  | 0.000  | 0.003  | 0.000  | -0.001 | 0.000  | 0.001  | 0.000  | -0.001 | 0.000  | 0.000  | 0.000  | 0.000  | 0.000  | 0.000  | 0.000  | 0.000  | 0.000  | 0.000  | 0.000  | 0.000  | 0.000  | 0.000  | 0.000  | 0.000  | 0.007  | 0.000 | 0.000  |       |
|                               | 23 | 0.003                         | -0.008 | -0.006 | 0.006  | -0.001 | -0.047 | 0.000  | -0.090 | 0.000  | -0.056 | 0.000  | 0.013  | 0.000  | 0.000  | 0.000  | 0.000  | 0.000  | 0.001  | 0.000  | 0.000  | 0.000  | 0.000  | 0.000  | 0.000  | 0.000  | 0.001  | 0.000  | 0.000  | 0.000  | 0.001  | 0.000 | 0.000  |       |
|                               | 24 | -0.001                        | -0.002 | 0.002  | 0.001  | 0.010  | 0.000  | 0.049  | 0.000  | -0.015 | 0.000  | 0.014  | 0.000  | 0.000  | 0.000  | 0.000  | 0.000  | 0.000  | 0.000  | 0.000  | 0.000  | 0.000  | 0.000  | 0.000  | 0.000  | 0.000  | 0.000  | 0.000  | 0.000  | 0.000  | 0.000  | 0.000 | 0.000  |       |
|                               | 25 | 0.000                         | 0.000  | 0.000  | 0.000  | 0.000  | 0.001  | 0.000  | 0.003  | 0.000  | 0.006  | 0.000  | 0.014  | 0.000  | 0.000  | 0.000  | 0.000  | 0.000  | 0.001  | 0.000  | 0.000  | 0.000  | 0.000  | 0.000  | 0.000  | 0.000  | 0.000  | 0.000  | 0.000  | -0.001 | 0.000  | 0.012 | 0.000  | 0.000 |
|                               | 26 | 0.000                         | -0.001 | -0.001 | 0.001  | 0.000  | -0.006 | 0.000  | -0.015 | 0.000  | -0.030 | 0.000  | -0.072 | 0.000  | 0.000  | 0.000  | 0.000  | 0.000  | -0.013 | 0.000  | 0.000  | 0.000  | 0.000  | 0.000  | 0.000  | 0.000  | 0.000  | 0.000  | 0.000  | 0.000  | 0.000  | 0.001 | 0.000  | 0.000 |
|                               | 27 | 0.000                         | 0.000  | 0.000  | 0.000  | 0.001  | 0.000  | 0.007  | 0.000  | -0.002 | 0.000  | -0.008 | 0.000  | -0.021 | 0.000  | 0.000  | 0.000  | 0.000  | 0.000  | 0.000  | 0.000  | 0.000  | 0.000  | 0.000  | 0.000  | 0.003  | 0.000  | 0.000  | 0.000  | 0.000  | 0.001  | 0.000 | -0.001 | 0.000 |
|                               | 28 | 0.000                         | 0.000  | 0.000  | 0.000  | 0.000  | 0.000  | -0.001 | 0.000  | 0.000  | 0.000  | 0.003  | 0.000  | 0.006  | 0.000  | 0.000  | 0.000  | 0.000  | 0.000  | 0.000  | 0.000  | 0.000  | 0.000  | 0.000  | 0.000  | -0.002 | 0.000  | 0.000  | 0.000  | 0.000  | 0.000  | 0.000 | -0.004 | 0.000 |
|                               | 29 | 0.000                         | 0.000  | 0.000  | 0.000  | 0.000  | 0.003  | 0.000  | 0.008  | 0.000  | 0.026  | 0.000  | 0.108  | 0.000  | 0.000  | 0.000  | 0.000  | 0.000  | -0.055 | 0.000  | 0.000  | 0.000  | 0.000  | 0.000  | 0.000  | 0.001  | 0.000  | -0.003 | 0.001  | 0.000  | 0.000  | 0.000 | 0.000  |       |
|                               | 30 | 0.000                         | 0.000  | 0.000  | 0.000  | 0.000  | 0.000  | 0.000  | 0.000  | 0.000  | 0.000  | 0.000  | 0.002  | 0.000  | 0.000  | 0.000  | 0.000  | 0.000  | 0.000  | 0.000  | 0.000  | 0.000  | 0.000  | 0.000  | 0.000  | 0.000  | 0.000  | 0.001  | 0.000  | 0.000  | 0.001  | 0.000 | -0.001 | 0.000 |
|                               | 31 | 0.001                         | -0.003 | 0.001  | 0.000  | -0.002 | 0.000  | -0.014 | 0.000  | 0.007  | 0.000  | -0.071 | 0.000  | -0.145 | 0.000  | 0.000  | 0.000  | 0.000  | 0.000  | 0.000  | 0.000  | 0.000  | 0.000  | 0.000  | 0.000  | 0.000  | -0.017 | 0.000  | 0.002  | 0.000  | 0.000  | 0.001 | 0.000  | 0.002 |
|                               | 32 | 0.000                         | 0.000  | 0.000  | 0.000  | 0.000  | 0.000  | 0.000  | -0.003 | 0.000  | 0.012  | 0.000  | 0.039  | 0.000  | 0.000  | 0.000  | 0.000  | 0.000  | -0.098 | 0.000  | 0.000  | 0.000  | 0.000  | 0.000  | 0.000  | 0.000  | 0.000  | 0.000  | -0.003 | -0.001 | 0.000  | 0.001 | 0.000  | 0.000 |

**Table S2.** CI coefficients ( $C_{ia}$ ) of the excited state for the BChl *a* 16-mer obtained using localized Kohn–Sham orbitals.

|                               |    | virtual orbitals ( $\alpha$ ) |        |        |        |        |        |        |        |        |        |        |        |        |        |        |        |        |        |       |        |        |        |        |        |        |        |       |        |       |        |       |       |       |       |       |       |       |       |       |       |       |       |       |       |       |       |       |       |       |
|-------------------------------|----|-------------------------------|--------|--------|--------|--------|--------|--------|--------|--------|--------|--------|--------|--------|--------|--------|--------|--------|--------|-------|--------|--------|--------|--------|--------|--------|--------|-------|--------|-------|--------|-------|-------|-------|-------|-------|-------|-------|-------|-------|-------|-------|-------|-------|-------|-------|-------|-------|-------|-------|
|                               |    | 33                            | 34     | 35     | 36     | 37     | 38     | 39     | 40     | 41     | 42     | 43     | 44     | 45     | 46     | 47     | 48     | 49     | 50     | 51    | 52     | 53     | 54     | 55     | 56     | 57     | 58     | 59    | 60     | 61    | 62     | 63    | 64    |       |       |       |       |       |       |       |       |       |       |       |       |       |       |       |       |       |
| occupied orbitals ( $\beta$ ) | 1  | 0.023                         | -0.016 | 0.148  | -0.003 | 0.031  | 0.001  | 0.009  | 0.000  | 0.002  | 0.000  | 0.000  | 0.000  | -0.002 | 0.000  | 0.000  | 0.000  | 0.002  | 0.000  | 0.002 | 0.000  | 0.000  | 0.000  | 0.000  | 0.000  | 0.000  | 0.000  | 0.000 | 0.000  | 0.000 | 0.000  | 0.000 | 0.000 | 0.000 | 0.000 | 0.000 | 0.000 | 0.000 | 0.000 |       |       |       |       |       |       |       |       |       |       |       |
|                               | 2  | -0.012                        | 0.003  | -0.047 | 0.001  | -0.010 | 0.000  | -0.003 | 0.000  | 0.000  | -0.001 | 0.000  | 0.000  | 0.000  | 0.001  | 0.000  | 0.000  | 0.000  | -0.001 | 0.000 | -0.001 | 0.000  | 0.000  | 0.000  | 0.000  | 0.000  | 0.000  | 0.000 | 0.000  | 0.000 | 0.000  | 0.000 | 0.000 | 0.000 | 0.000 | 0.000 | 0.000 | 0.000 | 0.000 | 0.000 | 0.000 |       |       |       |       |       |       |       |       |       |
|                               | 3  | -0.001                        | 0.000  | -0.010 | 0.007  | -0.001 | 0.000  | 0.001  | 0.000  | 0.000  | 0.000  | 0.000  | 0.000  | 0.000  | 0.000  | 0.000  | 0.000  | 0.000  | 0.000  | 0.000 | 0.000  | 0.000  | 0.000  | 0.000  | 0.000  | 0.000  | 0.000  | 0.000 | 0.000  | 0.000 | 0.000  | 0.000 | 0.000 | 0.000 | 0.000 | 0.000 | 0.000 | 0.000 | 0.000 | 0.000 | 0.000 | 0.000 |       |       |       |       |       |       |       |       |
|                               | 4  | -0.001                        | 0.000  | -0.033 | -0.001 | -0.006 | -0.001 | 0.002  | 0.000  | 0.000  | 0.000  | 0.000  | 0.000  | 0.000  | 0.000  | 0.000  | 0.000  | 0.000  | 0.000  | 0.000 | 0.000  | 0.000  | 0.000  | 0.000  | 0.000  | 0.000  | 0.000  | 0.000 | 0.000  | 0.000 | 0.000  | 0.000 | 0.000 | 0.000 | 0.000 | 0.000 | 0.000 | 0.000 | 0.000 | 0.000 | 0.000 | 0.000 | 0.000 | 0.000 |       |       |       |       |       |       |
|                               | 5  | 0.000                         | 0.000  | 0.000  | 0.000  | 0.005  | -0.001 | 0.005  | 0.000  | 0.001  | 0.000  | 0.000  | 0.000  | 0.000  | 0.000  | 0.000  | 0.000  | 0.000  | 0.000  | 0.000 | 0.000  | 0.000  | 0.000  | 0.000  | 0.000  | 0.000  | 0.000  | 0.000 | 0.000  | 0.000 | 0.000  | 0.000 | 0.000 | 0.000 | 0.000 | 0.000 | 0.000 | 0.000 | 0.000 | 0.000 | 0.000 | 0.000 | 0.000 | 0.000 |       |       |       |       |       |       |
|                               | 6  | 0.000                         | 0.000  | 0.000  | 0.000  | 0.018  | 0.001  | 0.025  | -0.001 | 0.003  | 0.000  | 0.001  | 0.000  | 0.000  | 0.000  | 0.000  | 0.000  | 0.000  | 0.000  | 0.000 | 0.000  | 0.000  | 0.000  | 0.000  | 0.000  | 0.000  | 0.000  | 0.000 | 0.000  | 0.000 | 0.000  | 0.000 | 0.000 | 0.000 | 0.000 | 0.000 | 0.000 | 0.000 | 0.000 | 0.000 | 0.000 | 0.000 | 0.000 | 0.000 | 0.000 |       |       |       |       |       |
|                               | 7  | 0.000                         | 0.000  | 0.000  | 0.001  | 0.000  | 0.000  | 0.007  | 0.022  | 0.002  | 0.001  | 0.000  | 0.000  | 0.000  | 0.000  | 0.000  | 0.000  | 0.000  | 0.000  | 0.000 | 0.000  | 0.000  | 0.000  | 0.000  | 0.000  | 0.000  | 0.000  | 0.000 | 0.000  | 0.000 | 0.000  | 0.000 | 0.000 | 0.000 | 0.000 | 0.000 | 0.000 | 0.000 | 0.000 | 0.000 | 0.000 | 0.000 | 0.000 | 0.000 | 0.000 |       |       |       |       |       |
|                               | 8  | 0.000                         | 0.000  | 0.000  | -0.003 | -0.005 | 0.001  | -0.117 | 0.002  | -0.028 | -0.002 | -0.004 | 0.000  | -0.001 | 0.000  | 0.000  | 0.000  | 0.000  | 0.000  | 0.000 | 0.000  | 0.000  | 0.000  | 0.000  | 0.000  | 0.000  | 0.000  | 0.000 | 0.000  | 0.000 | 0.000  | 0.000 | 0.000 | 0.000 | 0.000 | 0.000 | 0.000 | 0.000 | 0.000 | 0.000 | 0.000 | 0.000 | 0.000 | 0.000 | 0.000 | 0.000 |       |       |       |       |
|                               | 9  | 0.000                         | 0.000  | 0.000  | 0.000  | 0.000  | 0.000  | 0.000  | 0.000  | -0.004 | -0.006 | -0.005 | 0.000  | -0.001 | 0.000  | 0.000  | 0.000  | 0.000  | 0.000  | 0.000 | 0.000  | 0.000  | 0.000  | 0.000  | 0.000  | 0.000  | 0.000  | 0.000 | 0.000  | 0.000 | 0.000  | 0.000 | 0.000 | 0.000 | 0.000 | 0.000 | 0.000 | 0.000 | 0.000 | 0.000 | 0.000 | 0.000 | 0.000 | 0.000 | 0.000 | 0.000 |       |       |       |       |
|                               | 10 | 0.000                         | 0.000  | 0.000  | 0.000  | 0.000  | -0.001 | 0.000  | -0.014 | -0.001 | -0.074 | -0.010 | -0.029 | 0.000  | -0.007 | 0.000  | 0.001  | 0.000  | 0.000  | 0.000 | 0.000  | 0.000  | 0.000  | 0.000  | 0.000  | 0.000  | 0.000  | 0.000 | 0.000  | 0.000 | 0.000  | 0.000 | 0.000 | 0.000 | 0.000 | 0.000 | 0.000 | 0.000 | 0.000 | 0.000 | 0.000 | 0.000 | 0.000 | 0.000 | 0.000 | 0.000 |       |       |       |       |
|                               | 11 | 0.000                         | 0.000  | 0.000  | 0.000  | 0.000  | 0.000  | 0.000  | 0.000  | 0.000  | 0.000  | -0.002 | 0.013  | 0.042  | 0.006  | -0.001 | 0.000  | 0.000  | 0.000  | 0.000 | 0.000  | 0.000  | 0.000  | 0.000  | 0.000  | 0.000  | 0.000  | 0.000 | 0.000  | 0.000 | 0.000  | 0.000 | 0.000 | 0.000 | 0.000 | 0.000 | 0.000 | 0.000 | 0.000 | 0.000 | 0.000 | 0.000 | 0.000 | 0.000 | 0.000 | 0.000 |       |       |       |       |
|                               | 12 | 0.000                         | 0.000  | 0.000  | 0.000  | 0.000  | 0.000  | -0.001 | 0.000  | -0.012 | -0.001 | -0.217 | 0.008  | -0.081 | 0.000  | 0.006  | 0.000  | -0.001 | 0.000  | 0.000 | 0.000  | 0.000  | 0.000  | -0.001 | 0.000  | 0.000  | 0.000  | 0.000 | 0.000  | 0.000 | 0.000  | 0.000 | 0.000 | 0.000 | 0.000 | 0.000 | 0.000 | 0.000 | 0.000 | 0.000 | 0.000 | 0.000 | 0.000 | 0.000 | 0.000 | 0.000 | 0.000 |       |       |       |
|                               | 13 | 0.000                         | 0.000  | 0.000  | 0.000  | 0.000  | 0.000  | 0.000  | 0.000  | 0.000  | 0.000  | -0.001 | 0.000  | 0.000  | 0.000  | -0.038 | 0.000  | 0.000  | 0.000  | 0.000 | 0.000  | 0.001  | 0.000  | 0.001  | 0.000  | 0.000  | 0.000  | 0.000 | 0.000  | 0.000 | 0.000  | 0.000 | 0.000 | 0.000 | 0.000 | 0.000 | 0.000 | 0.000 | 0.000 | 0.000 | 0.000 | 0.000 | 0.000 | 0.000 | 0.000 | 0.000 | 0.000 |       |       |       |
|                               | 14 | 0.000                         | 0.000  | 0.000  | 0.000  | 0.000  | 0.000  | 0.000  | 0.000  | 0.001  | -0.002 | 0.032  | -0.002 | 0.235  | 0.004  | -0.030 | -0.004 | 0.003  | 0.001  | 0.000 | 0.000  | 0.000  | 0.000  | 0.000  | 0.000  | 0.000  | 0.000  | 0.000 | 0.000  | 0.000 | 0.000  | 0.000 | 0.000 | 0.000 | 0.000 | 0.000 | 0.000 | 0.000 | 0.000 | 0.000 | 0.000 | 0.000 | 0.000 | 0.000 | 0.000 | 0.000 | 0.000 |       |       |       |
|                               | 15 | 0.000                         | 0.000  | 0.000  | 0.000  | 0.000  | 0.000  | 0.000  | 0.000  | 0.000  | 0.000  | -0.001 | 0.001  | 0.000  | 0.008  | -0.002 | -0.087 | -0.062 | 0.018  | 0.001 | 0.001  | 0.000  | 0.000  | 0.001  | 0.000  | 0.000  | 0.000  | 0.000 | 0.000  | 0.000 | 0.000  | 0.000 | 0.000 | 0.000 | 0.000 | 0.000 | 0.000 | 0.000 | 0.000 | 0.000 | 0.000 | 0.000 | 0.000 | 0.000 | 0.000 | 0.000 | 0.000 |       |       |       |
|                               | 16 | 0.000                         | 0.000  | 0.000  | 0.000  | 0.000  | 0.000  | 0.000  | 0.000  | 0.000  | 0.000  | 0.000  | 0.002  | 0.000  | 0.025  | 0.002  | -0.293 | 0.002  | 0.055  | 0.004 | 0.004  | 0.000  | 0.000  | 0.001  | 0.000  | 0.000  | 0.000  | 0.000 | 0.000  | 0.000 | 0.000  | 0.000 | 0.000 | 0.000 | 0.000 | 0.000 | 0.000 | 0.000 | 0.000 | 0.000 | 0.000 | 0.000 | 0.000 | 0.000 | 0.000 | 0.000 | 0.000 |       |       |       |
|                               | 17 | 0.000                         | 0.000  | 0.000  | 0.000  | 0.000  | 0.000  | 0.000  | 0.000  | 0.000  | 0.000  | 0.000  | 0.000  | 0.000  | -0.001 | 0.002  | 0.014  | 0.001  | -0.058 | 0.035 | -0.007 | 0.005  | -0.001 | 0.002  | 0.000  | 0.000  | 0.000  | 0.000 | 0.000  | 0.000 | 0.000  | 0.000 | 0.000 | 0.000 | 0.000 | 0.000 | 0.000 | 0.000 | 0.000 | 0.000 | 0.000 | 0.000 | 0.000 | 0.000 | 0.000 | 0.000 | 0.000 | 0.000 |       |       |
|                               | 18 | 0.000                         | 0.000  | 0.000  | 0.000  | 0.000  | 0.000  | 0.000  | 0.000  | 0.000  | 0.000  | 0.001  | 0.000  | 0.002  | 0.004  | -0.002 | -0.061 | -0.002 | 0.240  | 0.022 | 0.028  | -0.005 | 0.002  | 0.000  | 0.000  | 0.000  | 0.000  | 0.002 | 0.000  | 0.000 | 0.000  | 0.000 | 0.000 | 0.000 | 0.000 | 0.000 | 0.000 | 0.000 | 0.000 | 0.000 | 0.000 | 0.000 | 0.000 | 0.000 | 0.000 | 0.000 | 0.000 | 0.000 |       |       |
|                               | 19 | 0.000                         | 0.000  | 0.000  | 0.000  | 0.000  | 0.000  | 0.000  | 0.000  | 0.000  | 0.000  | 0.000  | 0.000  | 0.000  | 0.000  | 0.002  | -0.001 | 0.000  | 0.005  | 0.001 | 0.041  | -0.050 | 0.005  | 0.001  | 0.000  | 0.000  | 0.000  | 0.000 | 0.000  | 0.000 | 0.000  | 0.000 | 0.000 | 0.000 | 0.000 | 0.000 | 0.000 | 0.000 | 0.000 | 0.000 | 0.000 | 0.000 | 0.000 | 0.000 | 0.000 | 0.000 | 0.000 | 0.000 |       |       |
|                               | 20 | 0.000                         | 0.000  | 0.000  | 0.000  | 0.000  | 0.000  | 0.000  | 0.000  | 0.000  | 0.000  | 0.000  | 0.000  | 0.000  | 0.000  | -0.003 | -0.004 | -0.001 | 0.026  | 0.002 | 0.245  | -0.016 | 0.030  | -0.002 | 0.002  | 0.000  | 0.000  | 0.000 | 0.000  | 0.000 | 0.000  | 0.000 | 0.000 | 0.000 | 0.000 | 0.000 | 0.000 | 0.000 | 0.000 | 0.000 | 0.000 | 0.000 | 0.000 | 0.000 | 0.000 | 0.000 | 0.000 | 0.000 | 0.000 |       |
|                               | 21 | 0.000                         | 0.000  | 0.000  | 0.000  | 0.000  | 0.000  | 0.000  | 0.000  | 0.000  | 0.000  | 0.000  | 0.000  | 0.000  | 0.000  | 0.000  | 0.000  | 0.000  | 0.000  | 0.000 | 0.000  | 0.000  | -0.003 | 0.000  | -0.017 | 0.019  | -0.003 | 0.001 | 0.000  | 0.000 | 0.000  | 0.000 | 0.000 | 0.000 | 0.000 | 0.000 | 0.000 | 0.000 | 0.000 | 0.000 | 0.000 | 0.000 | 0.000 | 0.000 | 0.000 | 0.000 | 0.000 | 0.000 |       |       |
|                               | 22 | 0.000                         | 0.000  | 0.000  | 0.000  | 0.000  | 0.000  | 0.000  | 0.000  | 0.000  | 0.000  | 0.000  | 0.000  | 0.000  | 0.000  | 0.001  | -0.001 | 0.000  | 0.004  | 0.000 | 0.047  | -0.004 | 0.137  | 0.000  | 0.017  | 0.000  | 0.001  | 0.001 | 0.000  | 0.000 | 0.000  | 0.000 | 0.000 | 0.000 | 0.000 | 0.000 | 0.000 | 0.000 | 0.000 | 0.000 | 0.000 | 0.000 | 0.000 | 0.000 | 0.000 | 0.000 | 0.000 | 0.000 | 0.000 |       |
|                               | 23 | 0.000                         | 0.000  | 0.000  | 0.000  | 0.000  | 0.000  | 0.000  | 0.000  | 0.000  | 0.000  | 0.000  | 0.000  | 0.000  | 0.000  | 0.000  | 0.000  | 0.000  | 0.000  | 0.000 | 0.000  | 0.000  | 0.003  | 0.000  | 0.026  | 0.031  | 0.003  | 0.001 | 0.000  | 0.000 | 0.000  | 0.000 | 0.000 | 0.000 | 0.000 | 0.000 | 0.000 | 0.000 | 0.000 | 0.000 | 0.000 | 0.000 | 0.000 | 0.000 | 0.000 | 0.000 | 0.000 | 0.000 | 0.000 |       |
|                               | 24 | 0.000                         | 0.000  | 0.000  | 0.000  | 0.000  | 0.000  | 0.000  | 0.000  | 0.000  | 0.000  | 0.000  | 0.000  | 0.000  | 0.000  | 0.000  | 0.000  | 0.000  | 0.000  | 0.000 | 0.004  | 0.000  | 0.023  | 0.001  | 0.178  | -0.010 | 0.022  | 0.001 | 0.001  | 0.000 | 0.000  | 0.000 | 0.000 | 0.000 | 0.000 | 0.000 | 0.000 | 0.000 | 0.000 | 0.000 | 0.000 | 0.000 | 0.000 | 0.000 | 0.000 | 0.000 | 0.000 | 0.000 | 0.000 | 0.000 |
|                               | 25 | 0.000                         | 0.000  | 0.000  | 0.000  | 0.000  | 0.000  | 0.000  | 0.000  | 0.000  | 0.000  | 0.000  | 0.000  | 0.000  | 0.000  | 0.000  | 0.000  | 0.000  | 0.000  | 0.000 | 0.000  | 0.000  | 0.000  | 0.001  | 0.000  | 0.006  | 0.000  | 0.011 | -0.007 | 0.000 | 0.000  | 0.000 | 0.000 | 0.000 | 0.000 | 0.000 | 0.000 | 0.000 | 0.000 | 0.000 | 0.000 | 0.000 | 0.000 | 0.000 | 0.000 | 0.000 | 0.000 | 0.000 | 0.000 |       |
|                               | 26 | 0.000                         | 0.000  | 0.000  | 0.000  | 0.000  | 0.000  | 0.000  | 0.000  | 0.000  | 0.000  | 0.000  | 0.000  | 0.000  | 0.000  | 0.000  | 0.000  | 0.000  | 0.000  | 0.000 | 0.000  | 0.000  | -0.001 | 0.000  | -0.003 | 0.000  | -0.031 | 0.000 | -0.079 | 0.000 | -0.007 | 0.001 | 0.000 | 0.000 | 0.006 | -0.   |       |       |       |       |       |       |       |       |       |       |       |       |       |       |

**Table S3.** CI coefficients ( $C_{ia}$ ) of the excited state for the BChl *a* 4-mer obtained using canonical Kohn–Sham orbitals.

|                                |          | virtual orbitals ( <i>a</i> ) |           |           |           |           |           |           |           |
|--------------------------------|----------|-------------------------------|-----------|-----------|-----------|-----------|-----------|-----------|-----------|
|                                |          | <b>9</b>                      | <b>10</b> | <b>11</b> | <b>12</b> | <b>13</b> | <b>14</b> | <b>15</b> | <b>16</b> |
| occupied orbitals ( <i>i</i> ) | <b>1</b> | 0.003                         | -0.001    | 0.000     | -0.004    | -0.048    | -0.015    | -0.016    | -0.022    |
|                                | <b>2</b> | -0.001                        | 0.000     | 0.004     | 0.002     | 0.006     | 0.009     | 0.066     | -0.016    |
|                                | <b>3</b> | 0.002                         | -0.001    | -0.002    | -0.002    | 0.033     | -0.044    | 0.043     | -0.009    |
|                                | <b>4</b> | 0.001                         | 0.000     | 0.000     | -0.001    | -0.017    | -0.010    | 0.018     | 0.073     |
|                                | <b>5</b> | 0.018                         | 0.070     | -0.049    | -0.245    | -0.008    | -0.001    | 0.001     | 0.001     |
|                                | <b>6</b> | -0.053                        | 0.151     | 0.189     | 0.001     | -0.002    | 0.001     | -0.001    | 0.001     |
|                                | <b>7</b> | 0.316                         | 0.160     | -0.218    | -0.010    | -0.003    | 0.001     | 0.001     | -0.001    |
|                                | <b>8</b> | 0.317                         | -0.204    | 0.160     | -0.109    | 0.002     | 0.001     | 0.000     | 0.000     |

**Table S4.** CI coefficients ( $C_{ia}$ ) of the excited state for the BChl *a* 4-mer obtained using localized Kohn–Sham orbitals.

|                                |          | virtual orbitals ( <i>a</i> ) |           |           |           |           |           |           |           |
|--------------------------------|----------|-------------------------------|-----------|-----------|-----------|-----------|-----------|-----------|-----------|
|                                |          | <b>9</b>                      | <b>10</b> | <b>11</b> | <b>12</b> | <b>13</b> | <b>14</b> | <b>15</b> | <b>16</b> |
| occupied orbitals ( <i>i</i> ) | <b>1</b> | -0.019                        | -0.085    | 0.016     | 0.004     | -0.003    | 0.000     | 0.000     | 0.000     |
|                                | <b>2</b> | 0.152                         | 0.148     | -0.034    | -0.007    | 0.005     | 0.000     | 0.000     | 0.000     |
|                                | <b>3</b> | 0.006                         | 0.007     | -0.116    | 0.070     | 0.020     | -0.002    | 0.001     | 0.000     |
|                                | <b>4</b> | 0.024                         | 0.030     | -0.406    | -0.092    | 0.085     | -0.001    | 0.006     | -0.002    |
|                                | <b>5</b> | 0.001                         | 0.001     | -0.014    | 0.000     | 0.072     | -0.045    | 0.008     | -0.004    |
|                                | <b>6</b> | -0.003                        | -0.003    | 0.058     | 0.007     | -0.288    | -0.026    | -0.040    | 0.022     |
|                                | <b>7</b> | 0.000                         | 0.000     | -0.002    | 0.000     | 0.012     | 0.000     | 0.130     | 0.028     |
|                                | <b>8</b> | 0.000                         | 0.000     | -0.005    | -0.001    | 0.039     | 0.003     | 0.324     | -0.158    |

**Table S5.** Absorption energies of BChl *a* calculated using TDDFT.

|                      | in <i>vacuo</i> |       | in acetone <sup>a</sup> |       |
|----------------------|-----------------|-------|-------------------------|-------|
|                      | nm              | eV    | nm                      | eV    |
| $\omega$ B97X/6-31G* | 732             | 1.693 | 761                     | 1.630 |
| B3LYP/6-31G*         | 655             | 1.893 | 687                     | 1.805 |
| CAM-B3LYP/6-31G*     | 710             | 1.747 | 741                     | 1.673 |
| Exp. <sup>b</sup>    | -               | -     | 772                     | 1.606 |

<sup>a</sup>The effect of acetone was included using the polarizable continuum model

(PCM)<sup>1</sup>.

<sup>b</sup>Ref. <sup>2</sup>

**Table S6.** Calculated absorption energies of BChl *a* in LH1.

| Chromophore <sup>a</sup> | in <i>vacuo</i><br>(eV) | in protein<br>(eV) |
|--------------------------|-------------------------|--------------------|
| BChl <i>a</i> (A-101)    | 1.690                   | 1.741              |
| BChl <i>a</i> (B-101)    | 1.668                   | 1.653              |
| BChl <i>a</i> (D-101)    | 1.729                   | 1.881              |
| BChl <i>a</i> (E-102)    | 1.630                   | 1.618              |
| BChl <i>a</i> (F-101)    | 1.731                   | 1.867              |
| BChl <i>a</i> (G-102)    | 1.670                   | 1.664              |
| BChl <i>a</i> (I-101)    | 1.648                   | 1.703              |
| BChl <i>a</i> (J-102)    | 1.665                   | 1.654              |
| BChl <i>a</i> (K-101)    | 1.672                   | 1.729              |
| BChl <i>a</i> (N-102)    | 1.665                   | 1.663              |
| BChl <i>a</i> (O-101)    | 1.718                   | 1.814              |
| BChl <i>a</i> (P-102)    | 1.652                   | 1.639              |
| BChl <i>a</i> (Q-101)    | 1.737                   | 1.875              |
| BChl <i>a</i> (Q-102)    | 1.689                   | 1.688              |
| BChl <i>a</i> (S-101)    | 1.671                   | 1.706              |
| BChl <i>a</i> (T-102)    | 1.689                   | 1.683              |
| BChl <i>a</i> (U-101)    | 1.720                   | 1.810              |
| BChl <i>a</i> (V-102)    | 1.686                   | 1.677              |
| BChl <i>a</i> (W-101)    | 1.711                   | 1.813              |
| BChl <i>a</i> (X-102)    | 1.658                   | 1.642              |
| BChl <i>a</i> (Y-101)    | 1.726                   | 1.825              |
| BChl <i>a</i> (Z-102)    | 1.673                   | 1.669              |
| BChl <i>a</i> (1-101)    | 1.669                   | 1.736              |
| BChl <i>a</i> (2-102)    | 1.659                   | 1.648              |
| BChl <i>a</i> (3-101)    | 1.718                   | 1.830              |
| BChl <i>a</i> (4-102)    | 1.664                   | 1.650              |
| BChl <i>a</i> (5-202)    | 1.664                   | 1.716              |
| BChl <i>a</i> (6-102)    | 1.640                   | 1.636              |
| BChl <i>a</i> (7-101)    | 1.718                   | 1.844              |
| BChl <i>a</i> (8-102)    | 1.664                   | 1.652              |
| BChl <i>a</i> (9-101)    | 1.728                   | 1.818              |
| BChl <i>a</i> (0-102)    | 1.672                   | 1.668              |

<sup>a</sup>Numbers in parentheses indicate chain ID and residue ID as

defined in the Protein Data Bank (PDB) (PDB ID: 7EQD<sup>3</sup>).

**Table S7.** HOMO–LUMO gaps of the BChl *a* monomer and dimer in LH1, B850, and B800 (eV).<sup>a</sup>

| LH1   |       |            | B850  |       |            | B800  |       |            |
|-------|-------|------------|-------|-------|------------|-------|-------|------------|
| 1-mer | 2-mer | $\Delta^b$ | 1-mer | 2-mer | $\Delta^b$ | 1-mer | 2-mer | $\Delta^b$ |
| 4.375 | 4.185 | 0.190      | 4.340 | 4.223 | 0.117      | 4.469 | 4.380 | 0.089      |

<sup>a</sup>HOMO–LUMO gaps were calculated with DFT at the  $\omega$ B97X/6-31G\* level.

<sup>b</sup>Difference in the HOMO–LUMO gap between the monomer and the dimer.

**Table S8.** Excitonic couplings ( $|V|$ ) between adjacent BChl  $a$  in LH1.

| Chromophore pair <sup>a</sup>       | $ V $               |       |
|-------------------------------------|---------------------|-------|
|                                     | (cm <sup>-1</sup> ) | (eV)  |
| BChl $a$ (A-101) - BChl $a$ (B-101) | 332.2               | 0.041 |
| BChl $a$ (B-101) - BChl $a$ (D-101) | 263.8               | 0.033 |
| BChl $a$ (D-101) - BChl $a$ (E-102) | 350.3               | 0.043 |
| BChl $a$ (E-102) - BChl $a$ (F-101) | 276.9               | 0.034 |
| BChl $a$ (F-101) - BChl $a$ (G-102) | 335.6               | 0.042 |
| BChl $a$ (G-102) - BChl $a$ (I-101) | 258.3               | 0.032 |
| BChl $a$ (I-101) - BChl $a$ (J-102) | 341.2               | 0.042 |
| BChl $a$ (J-102) - BChl $a$ (K-101) | 245.9               | 0.030 |
| BChl $a$ (K-101) - BChl $a$ (N-102) | 350.0               | 0.043 |
| BChl $a$ (N-102) - BChl $a$ (O-101) | 236.3               | 0.029 |
| BChl $a$ (O-101) - BChl $a$ (P-102) | 355.1               | 0.044 |
| BChl $a$ (P-102) - BChl $a$ (Q-101) | 270.2               | 0.033 |
| BChl $a$ (Q-101) - BChl $a$ (Q-102) | 331.7               | 0.041 |
| BChl $a$ (Q-102) - BChl $a$ (S-101) | 241.5               | 0.030 |
| BChl $a$ (S-101) - BChl $a$ (T-102) | 326.6               | 0.040 |
| BChl $a$ (T-102) - BChl $a$ (U-101) | 236.7               | 0.029 |
| BChl $a$ (U-101) - BChl $a$ (V-102) | 335.9               | 0.042 |
| BChl $a$ (V-102) - BChl $a$ (W-101) | 249.3               | 0.031 |
| BChl $a$ (W-101) - BChl $a$ (X-102) | 326.7               | 0.041 |
| BChl $a$ (X-102) - BChl $a$ (Y-101) | 249.4               | 0.031 |
| BChl $a$ (Y-101) - BChl $a$ (Z-102) | 383.1               | 0.048 |
| BChl $a$ (Z-102) - BChl $a$ (1-101) | 237.5               | 0.029 |
| BChl $a$ (1-101) - BChl $a$ (2-102) | 375.0               | 0.046 |
| BChl $a$ (2-102) - BChl $a$ (3-101) | 266.3               | 0.033 |
| BChl $a$ (3-101) - BChl $a$ (4-102) | 333.3               | 0.041 |
| BChl $a$ (4-102) - BChl $a$ (5-202) | 249.0               | 0.031 |
| BChl $a$ (5-202) - BChl $a$ (6-102) | 361.0               | 0.045 |
| BChl $a$ (6-102) - BChl $a$ (7-101) | 275.1               | 0.034 |
| BChl $a$ (7-101) - BChl $a$ (8-102) | 335.7               | 0.042 |
| BChl $a$ (8-102) - BChl $a$ (9-101) | 250.9               | 0.031 |
| BChl $a$ (9-101) - BChl $a$ (0-102) | 365.1               | 0.045 |
| BChl $a$ (0-102) - BChl $a$ (A-101) | 254.5               | 0.032 |

<sup>a</sup>Numbers in parentheses indicate chain ID and residue ID as defined in the PDB (PDB ID: 7EQD<sup>3</sup>).



**Table S9.** Excitonic couplings ( $|V|$ ) between adjacent BChl  $a$  in B850.

| Chromophore pair <sup>a</sup>           | $ V $               |       |
|-----------------------------------------|---------------------|-------|
|                                         | (cm <sup>-1</sup> ) | (eV)  |
| BChl $a$ (2-A-301) - BChl $a$ (2-B-302) | 351.7               | 0.044 |
| BChl $a$ (1-E-305) - BChl $a$ (1-F-306) | 320.8               | 0.040 |
| BChl $a$ (1-C-303) - BChl $a$ (1-D-304) | 350.5               | 0.043 |
| BChl $a$ (1-A-301) - BChl $a$ (1-B-302) | 254.5               | 0.032 |
| BChl $a$ (3-E-305) - BChl $a$ (3-F-306) | 369.2               | 0.046 |
| BChl $a$ (3-C-303) - BChl $a$ (3-D-304) | 353.0               | 0.044 |
| BChl $a$ (3-A-301) - BChl $a$ (3-B-302) | 350.6               | 0.043 |
| BChl $a$ (2-E-305) - BChl $a$ (2-F-306) | 327.2               | 0.041 |
| BChl $a$ (2-C-303) - BChl $a$ (2-D-304) | 327.4               | 0.041 |
| BChl $a$ (2-A-301) - BChl $a$ (1-F-306) | 205.0               | 0.025 |
| BChl $a$ (1-E-305) - BChl $a$ (1-D-304) | 218.6               | 0.027 |
| BChl $a$ (1-C-303) - BChl $a$ (1-B-302) | 37.0                | 0.005 |
| BChl $a$ (1-A-301) - BChl $a$ (3-F-306) | 235.2               | 0.029 |
| BChl $a$ (3-E-305) - BChl $a$ (3-D-304) | 71.0                | 0.009 |
| BChl $a$ (3-C-303) - BChl $a$ (3-B-302) | 56.1                | 0.007 |
| BChl $a$ (3-A-301) - BChl $a$ (2-F-306) | 38.6                | 0.005 |
| BChl $a$ (2-E-305) - BChl $a$ (2-D-304) | 24.2                | 0.003 |
| BChl $a$ (2-B-302) - BChl $a$ (2-C-303) | 171.2               | 0.021 |

<sup>a</sup>Numbers in parentheses indicate chain ID and residue ID as defined in the PDB (PDB ID: 1NKZ<sup>4</sup>).

**Figure S1.** Plots of canonical Kohn–Sham orbitals for the BChl *a* 16-mer considered in the CI coefficient analysis (Table S1).

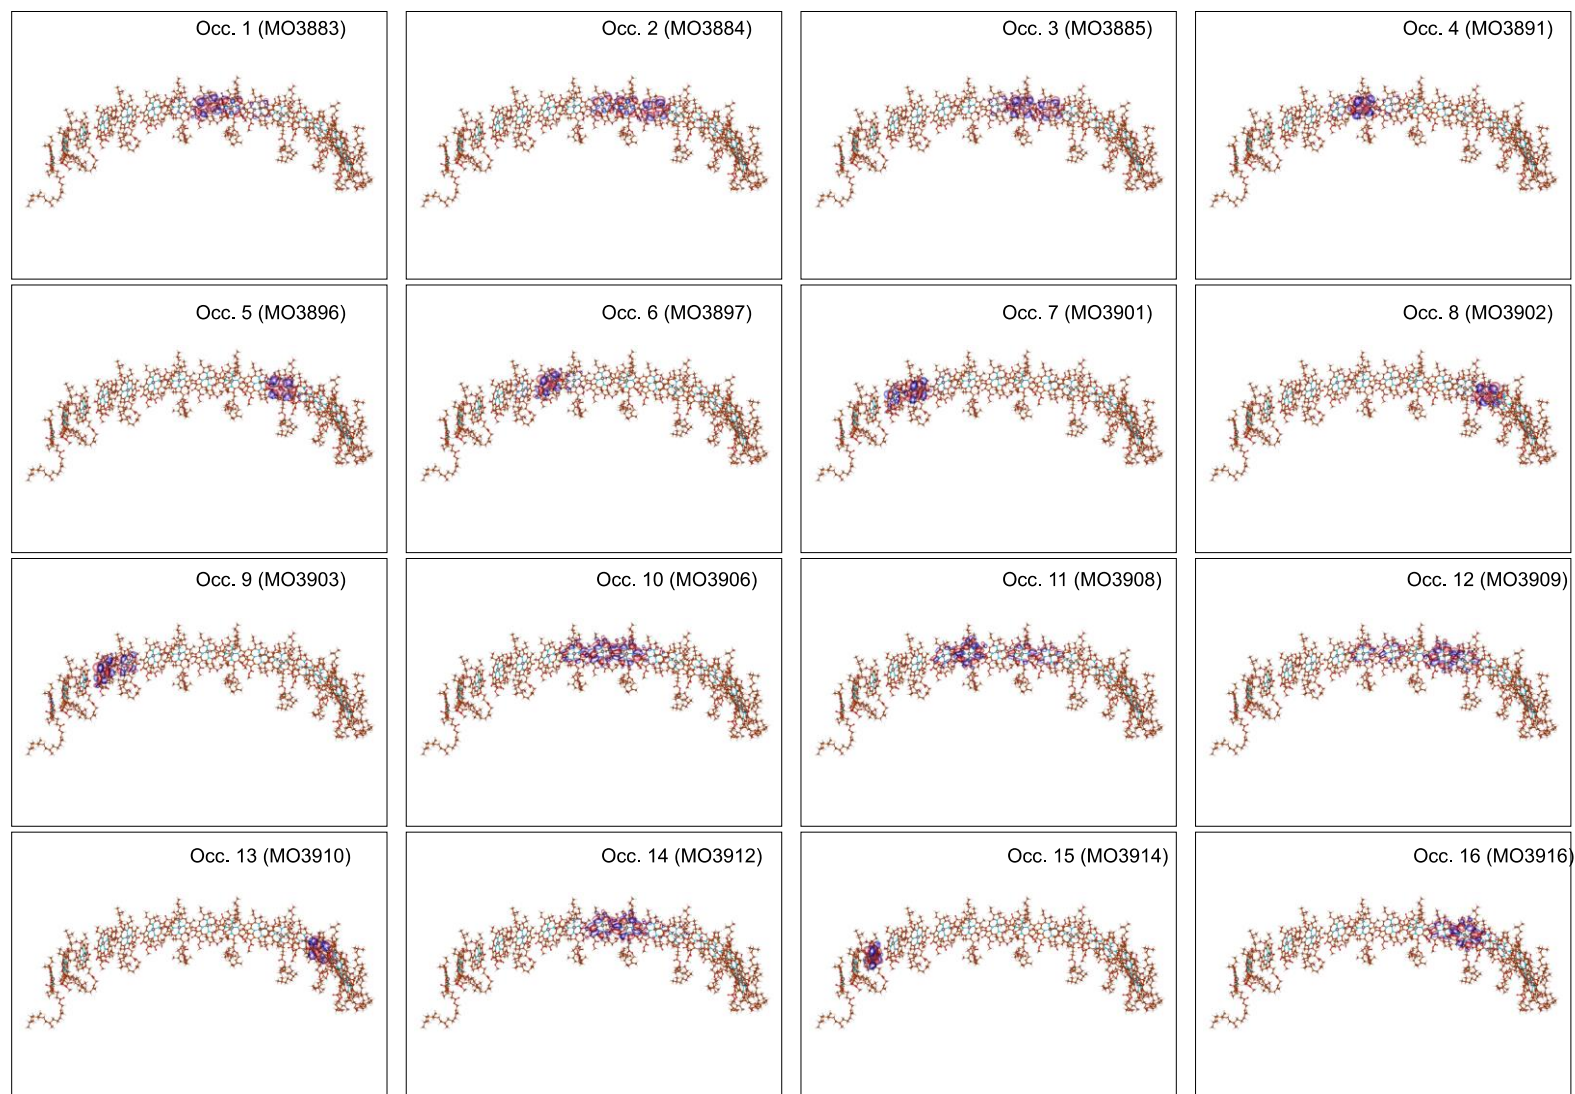

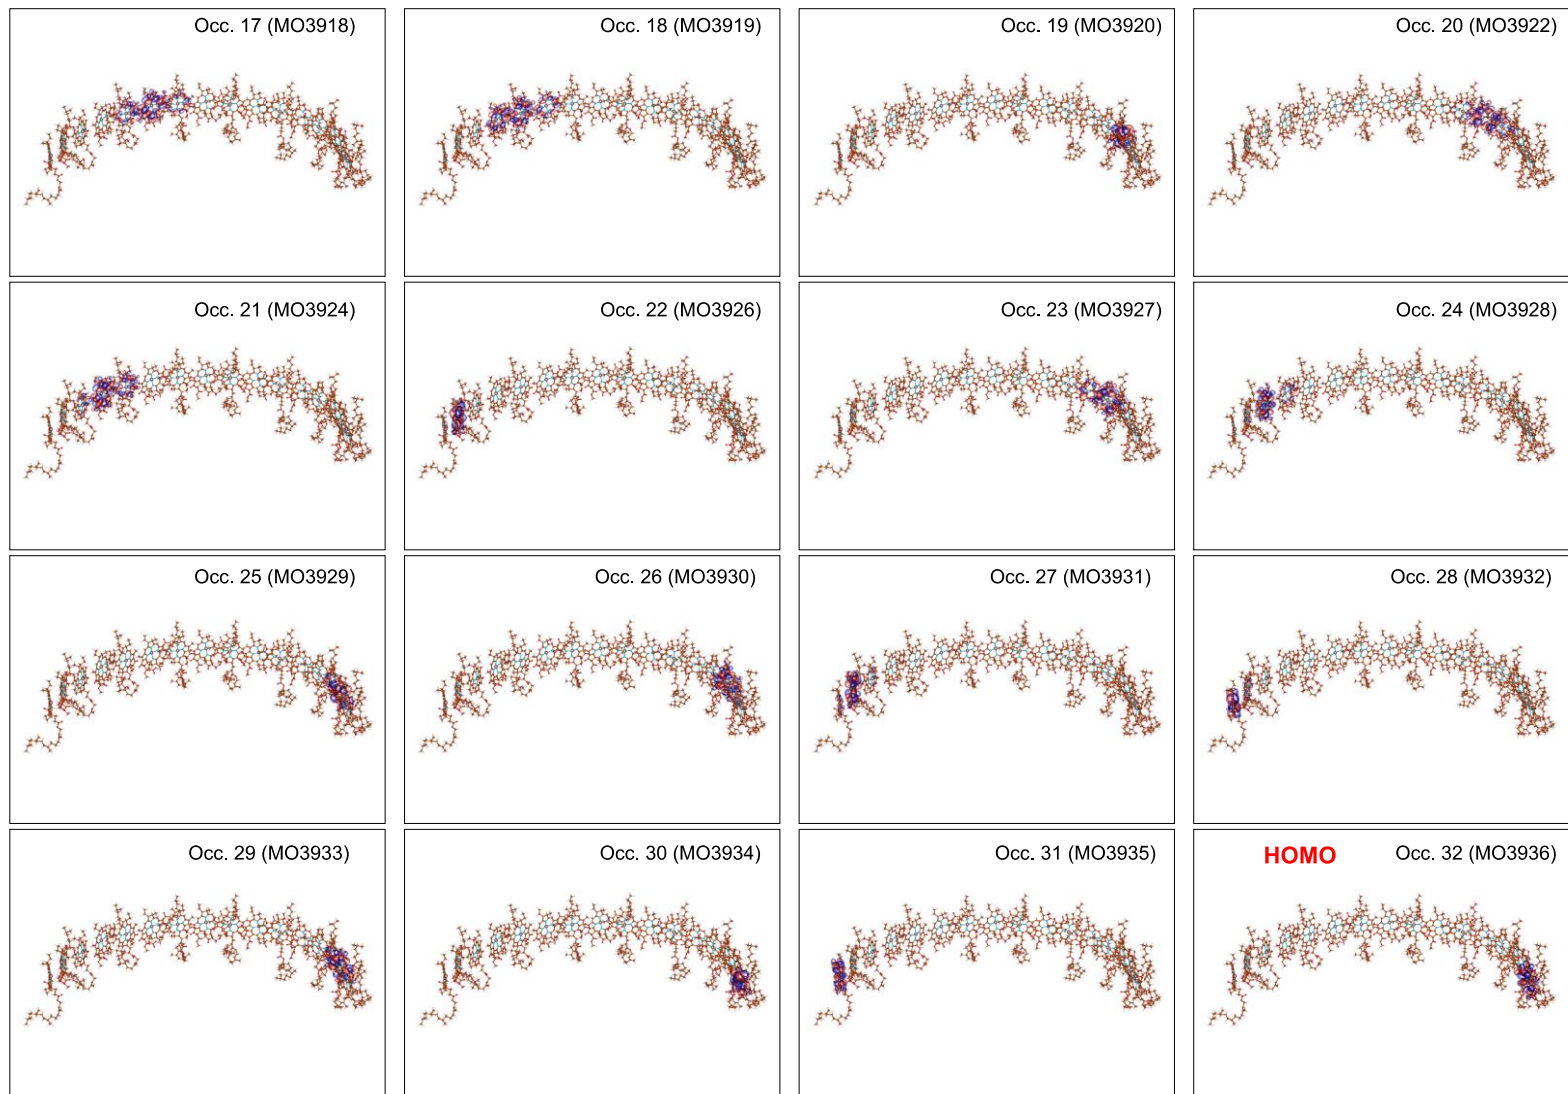

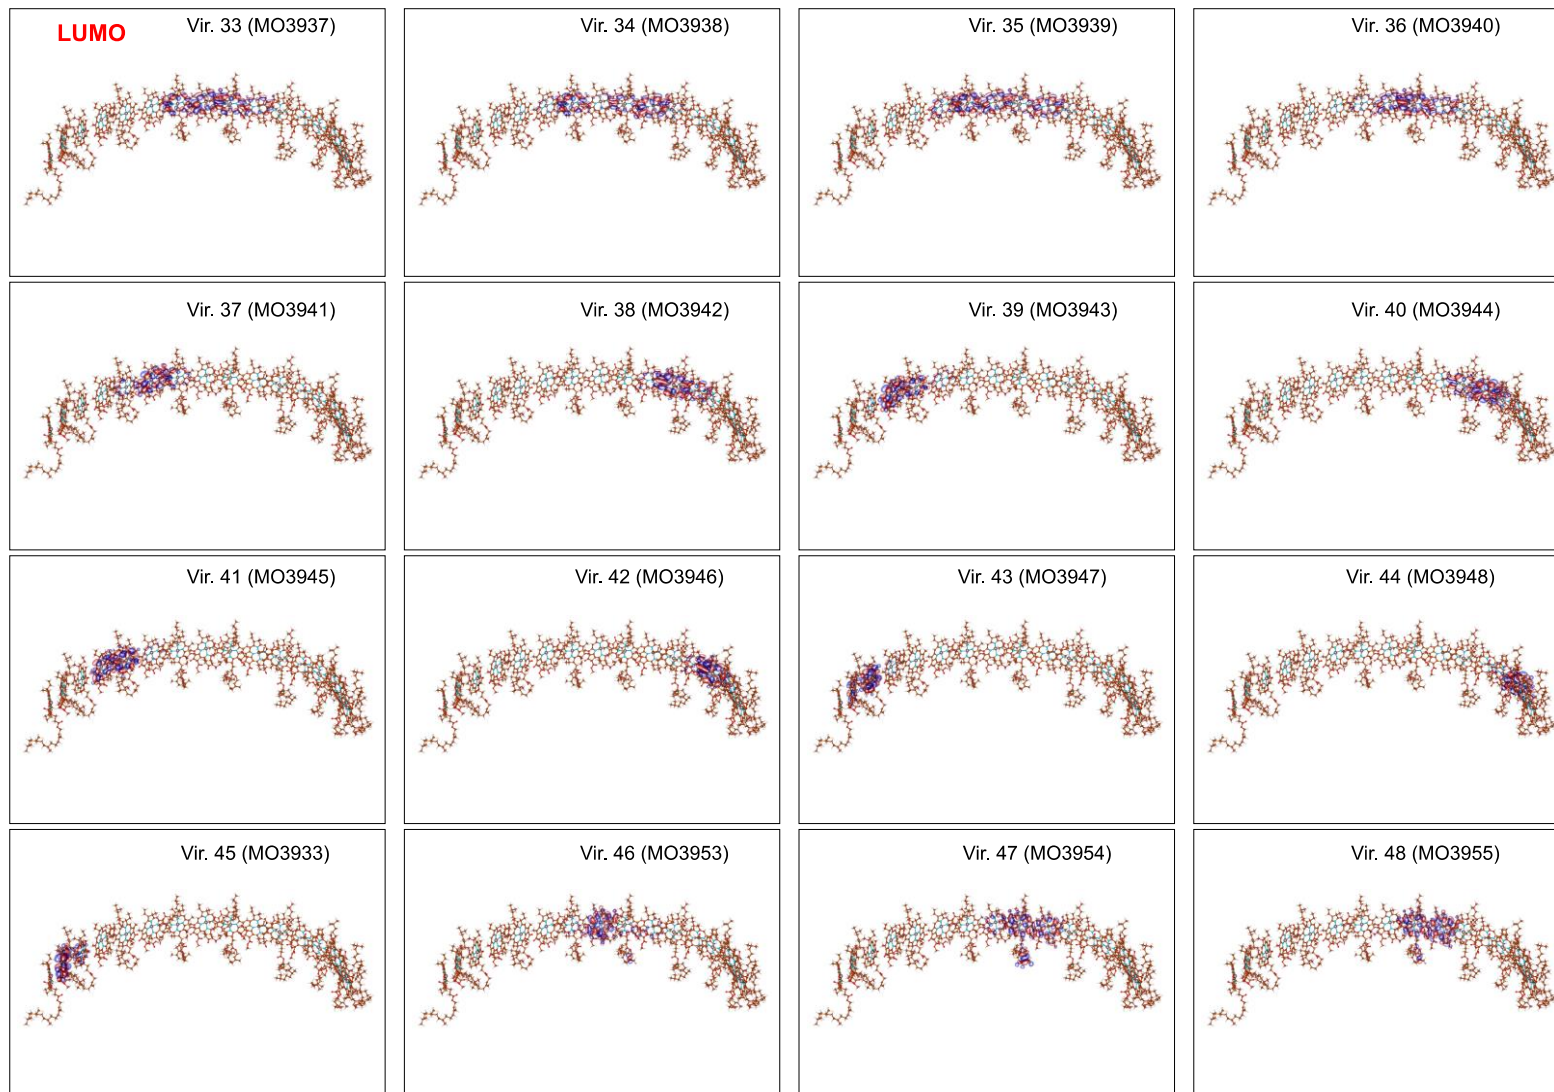

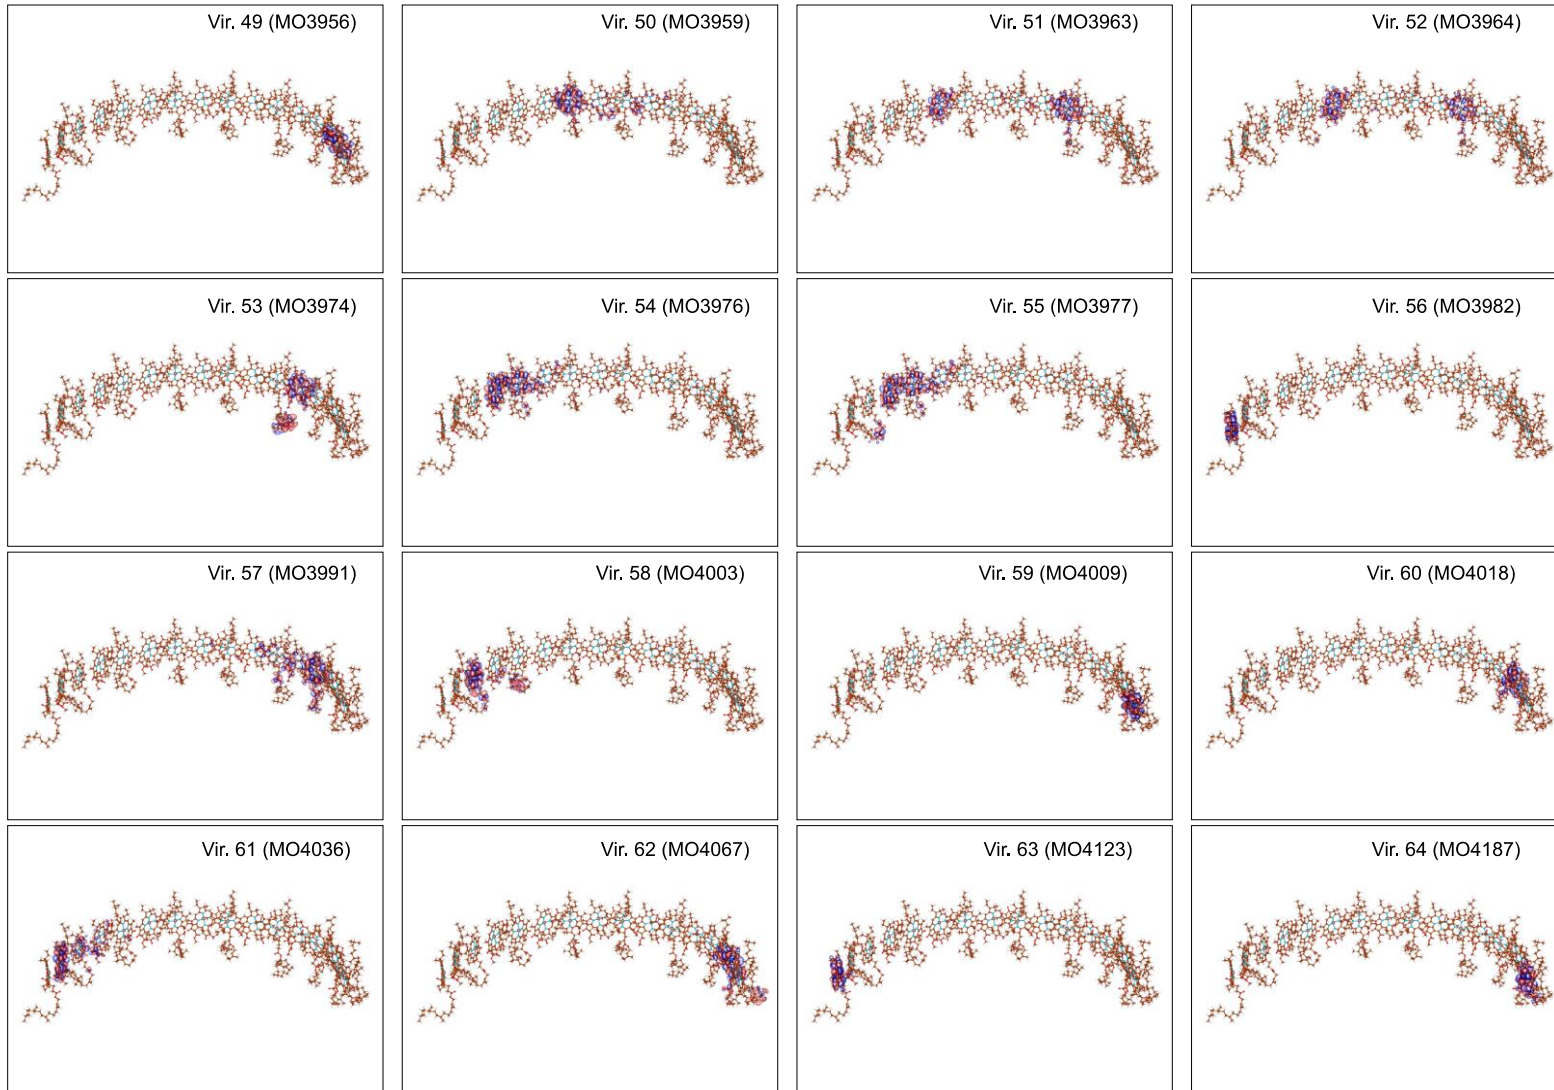

**Figure S2.** Plots of localized Kohn–Sham orbitals for the BChl *a* 16-mer considered in the CI coefficient analysis (Table S2).

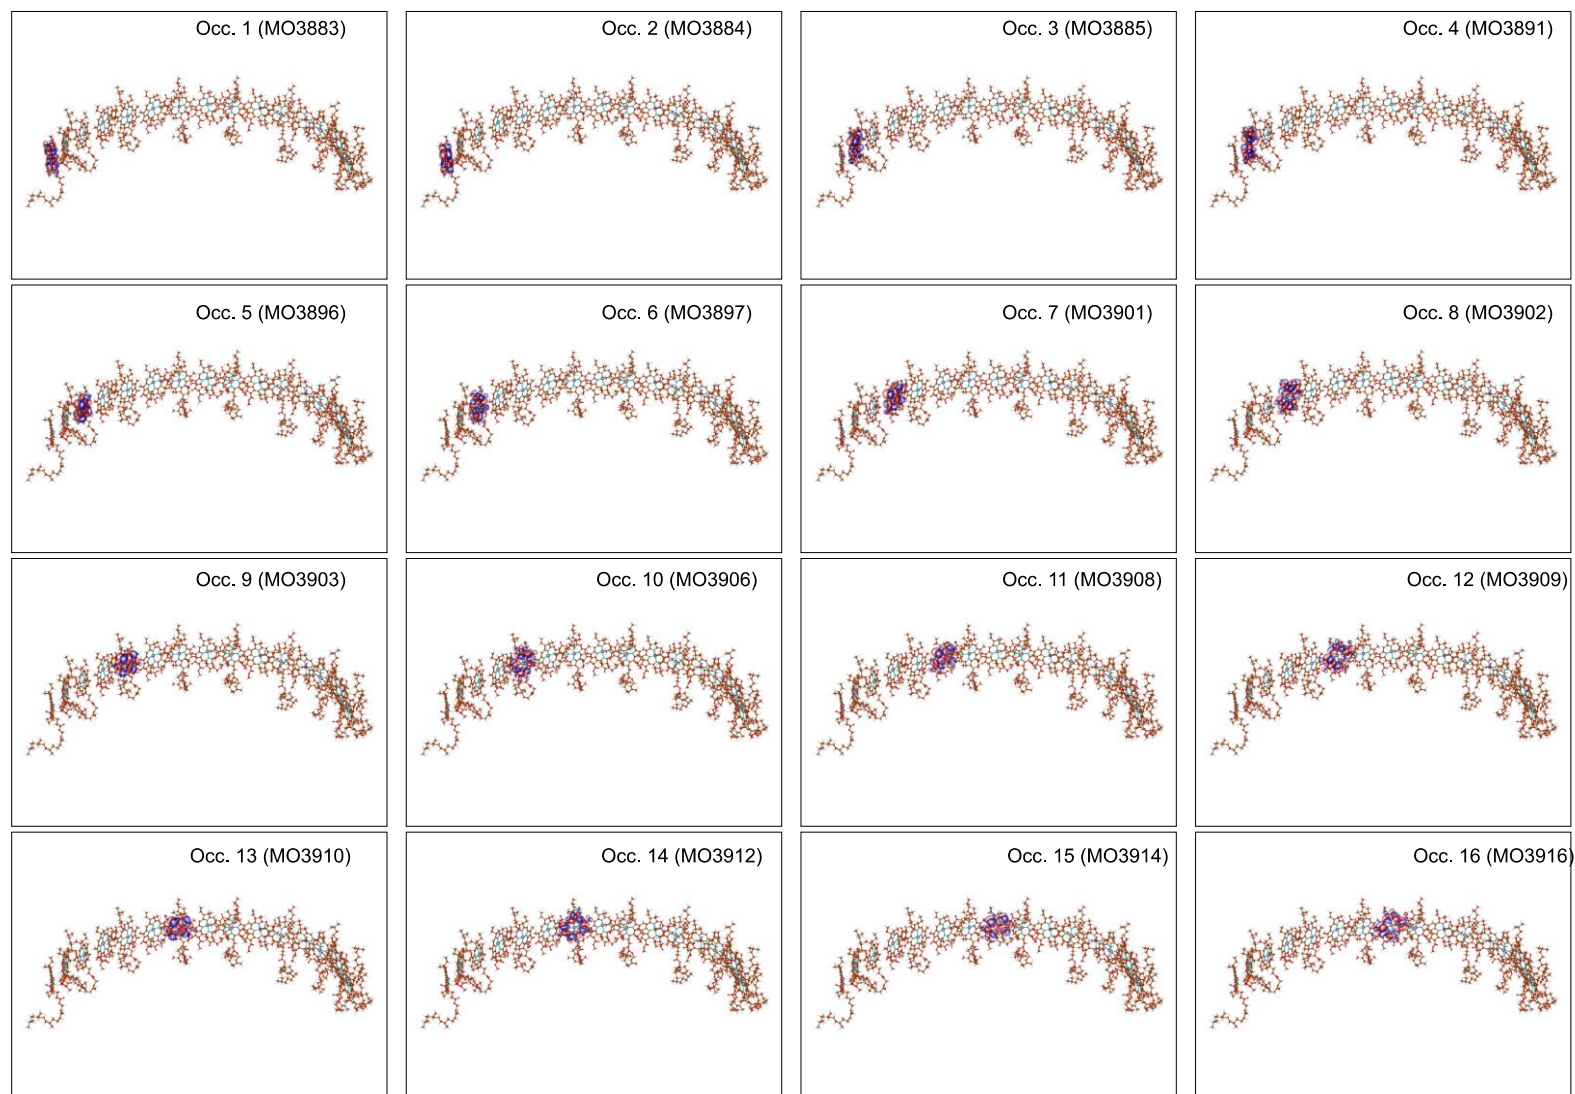



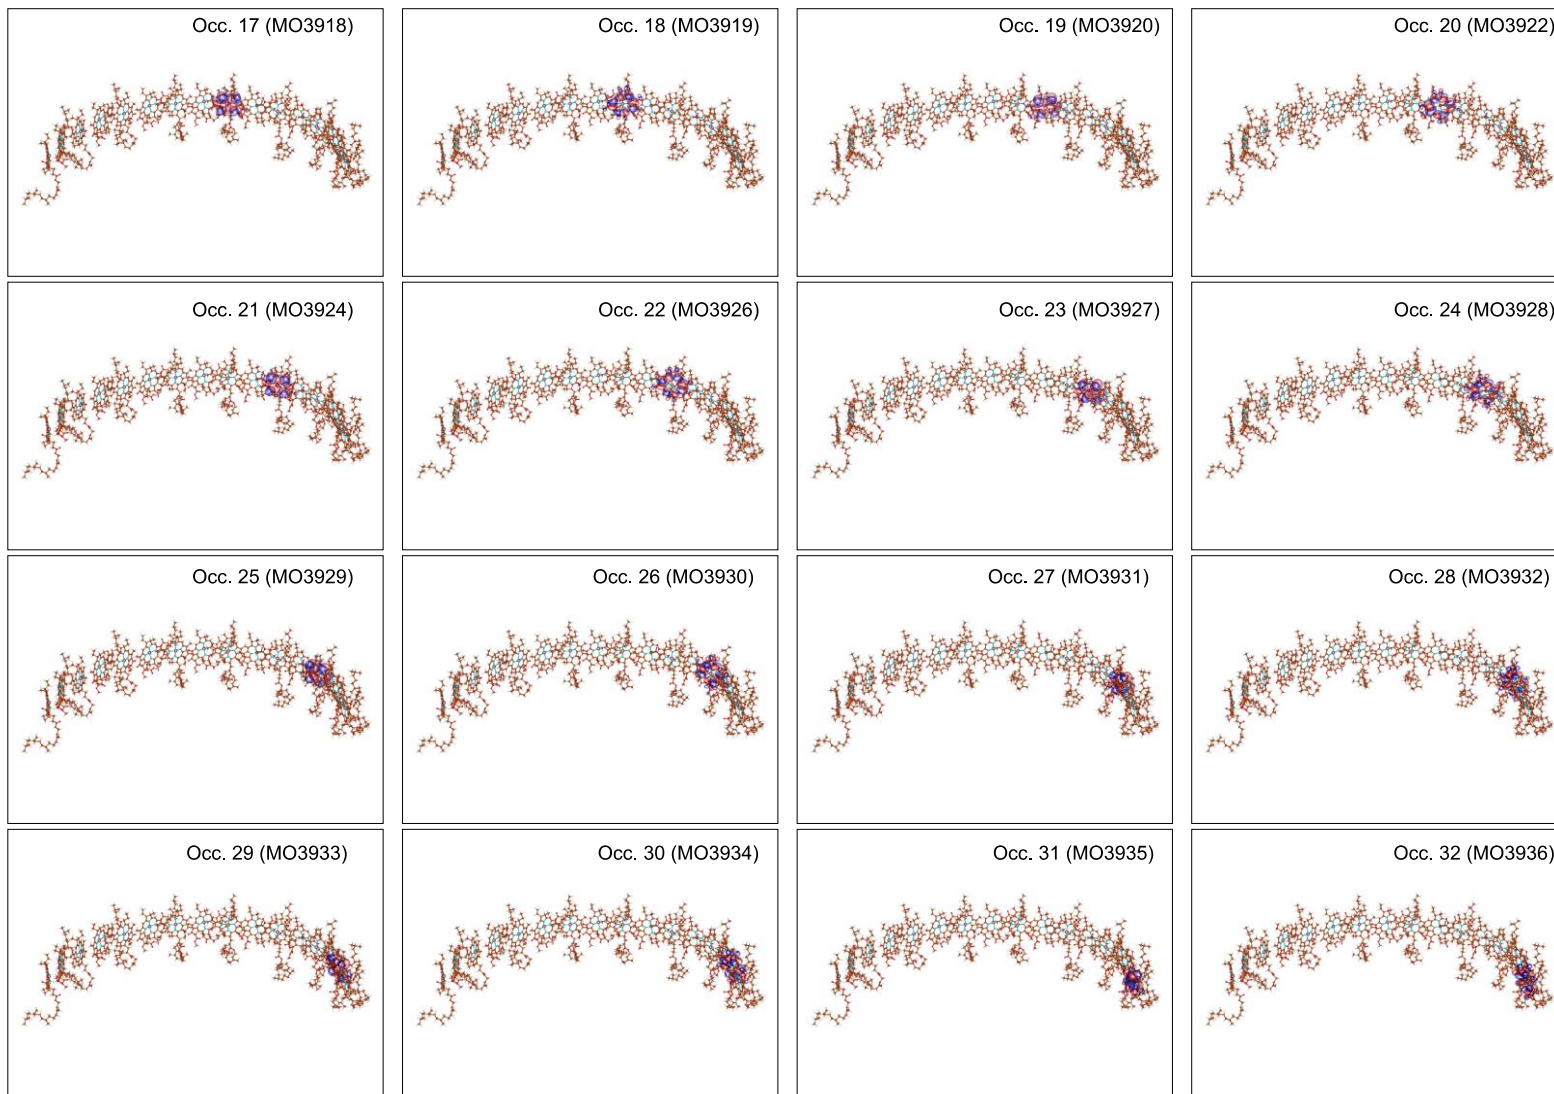

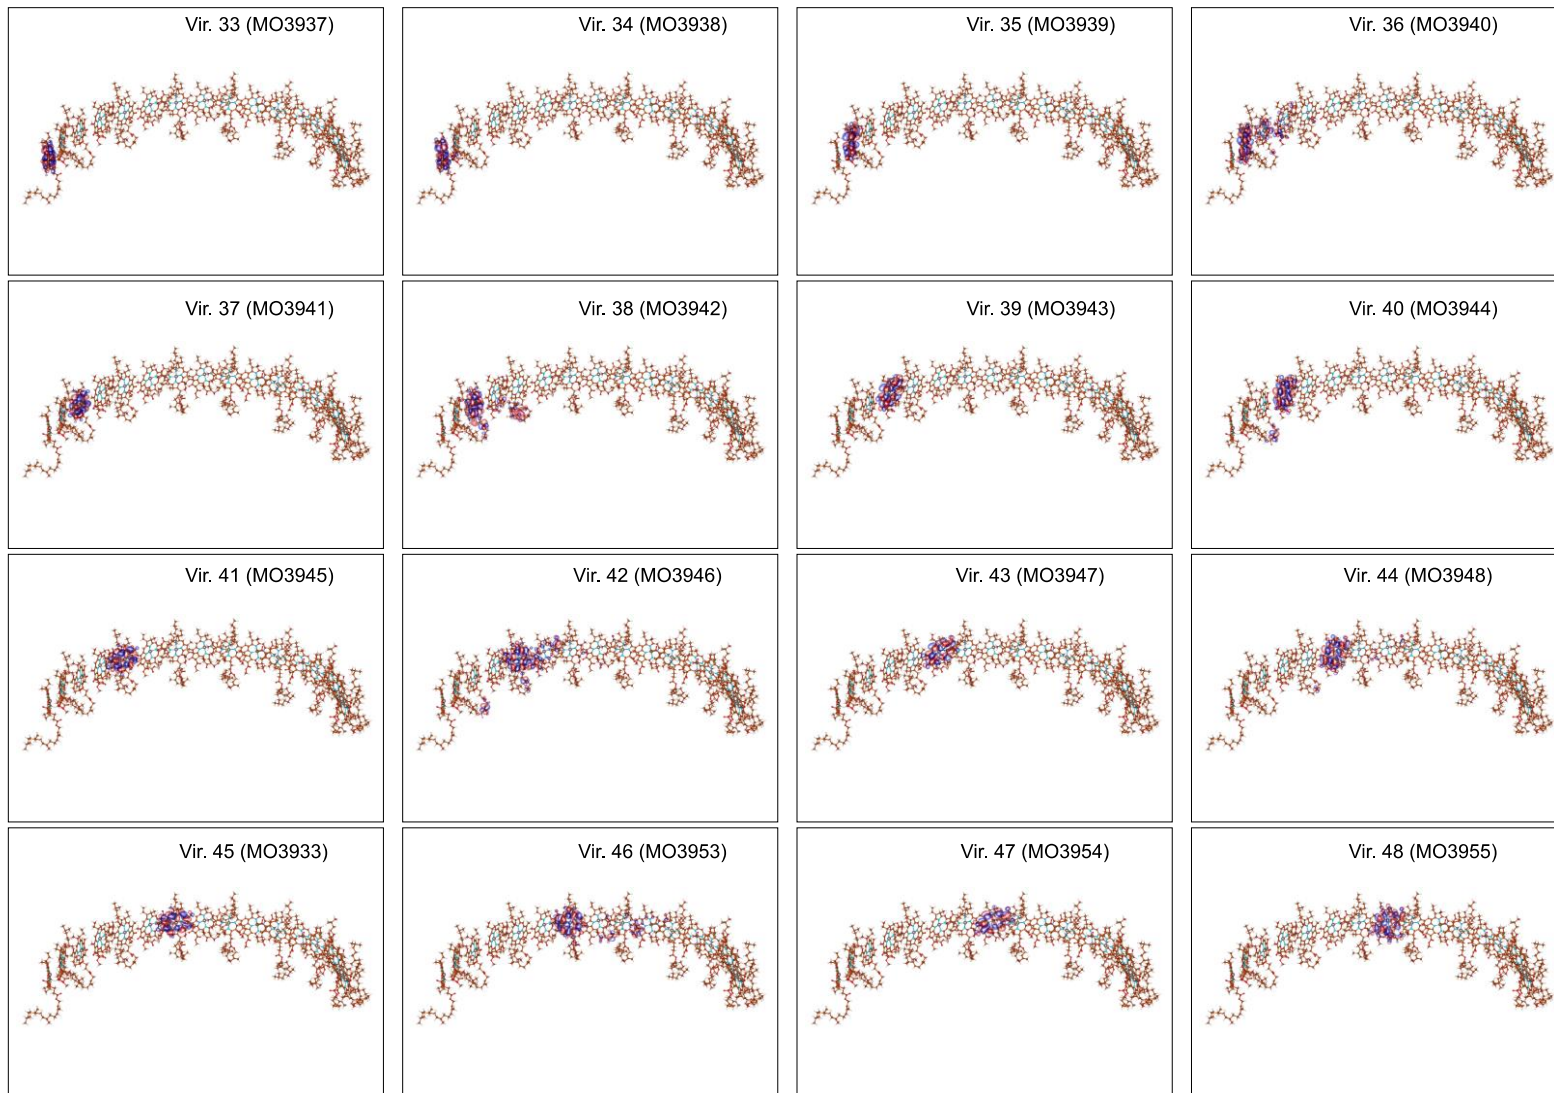



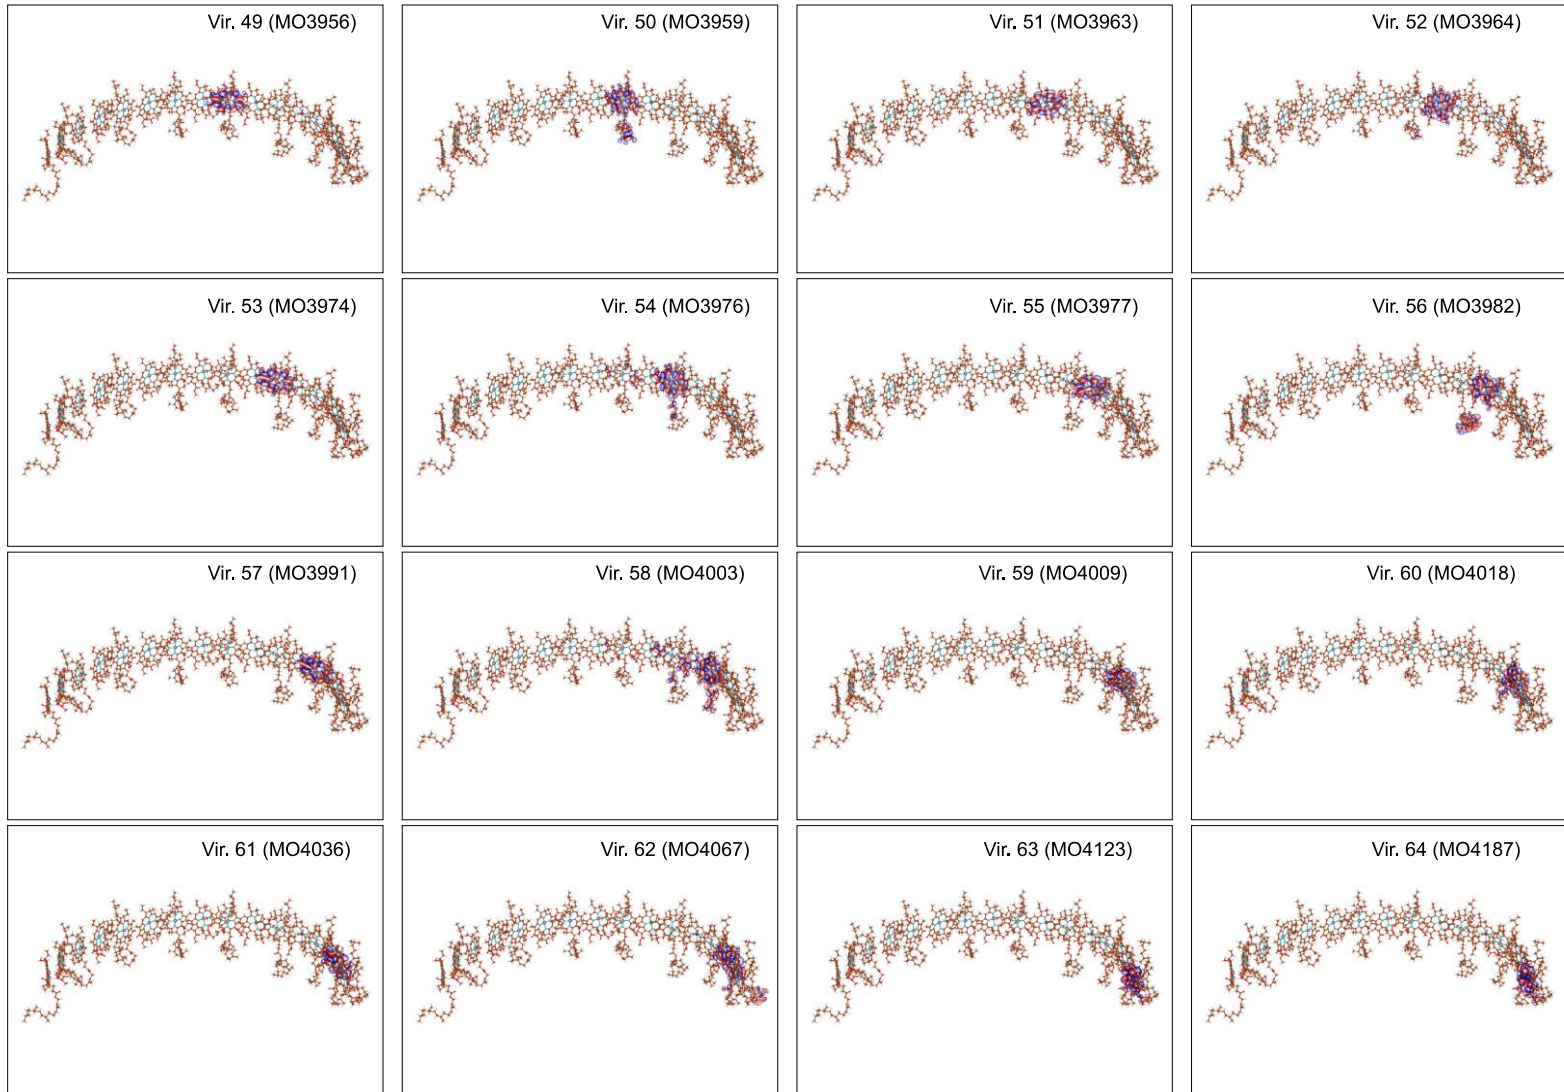

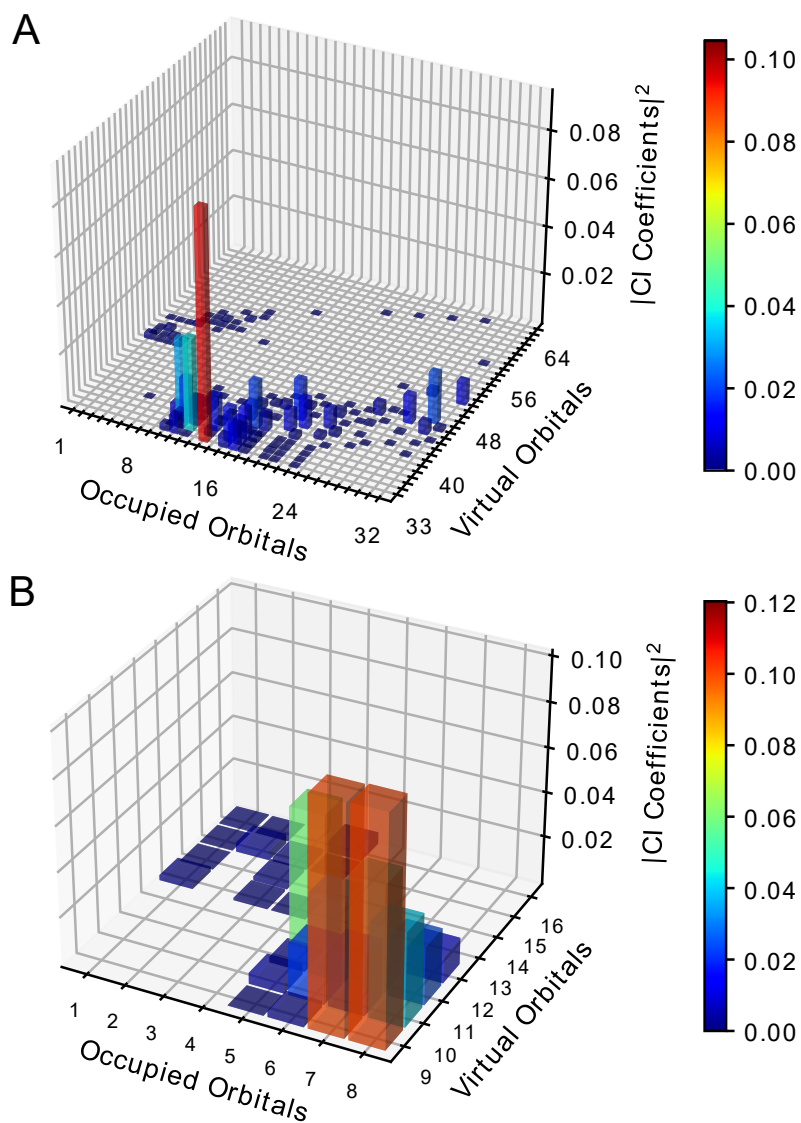

**Figure S3.** Plots of the CI coefficients of the excited states for the (A) BChl *a* 16-mer and (B) BChl *a* 4-mer obtained using canonical Kohn–Sham orbitals.

**Figure S4.** Plots of canonical Kohn–Sham orbitals for the BChl *a* 4-mer considered in the CI coefficient analysis (Table S3).

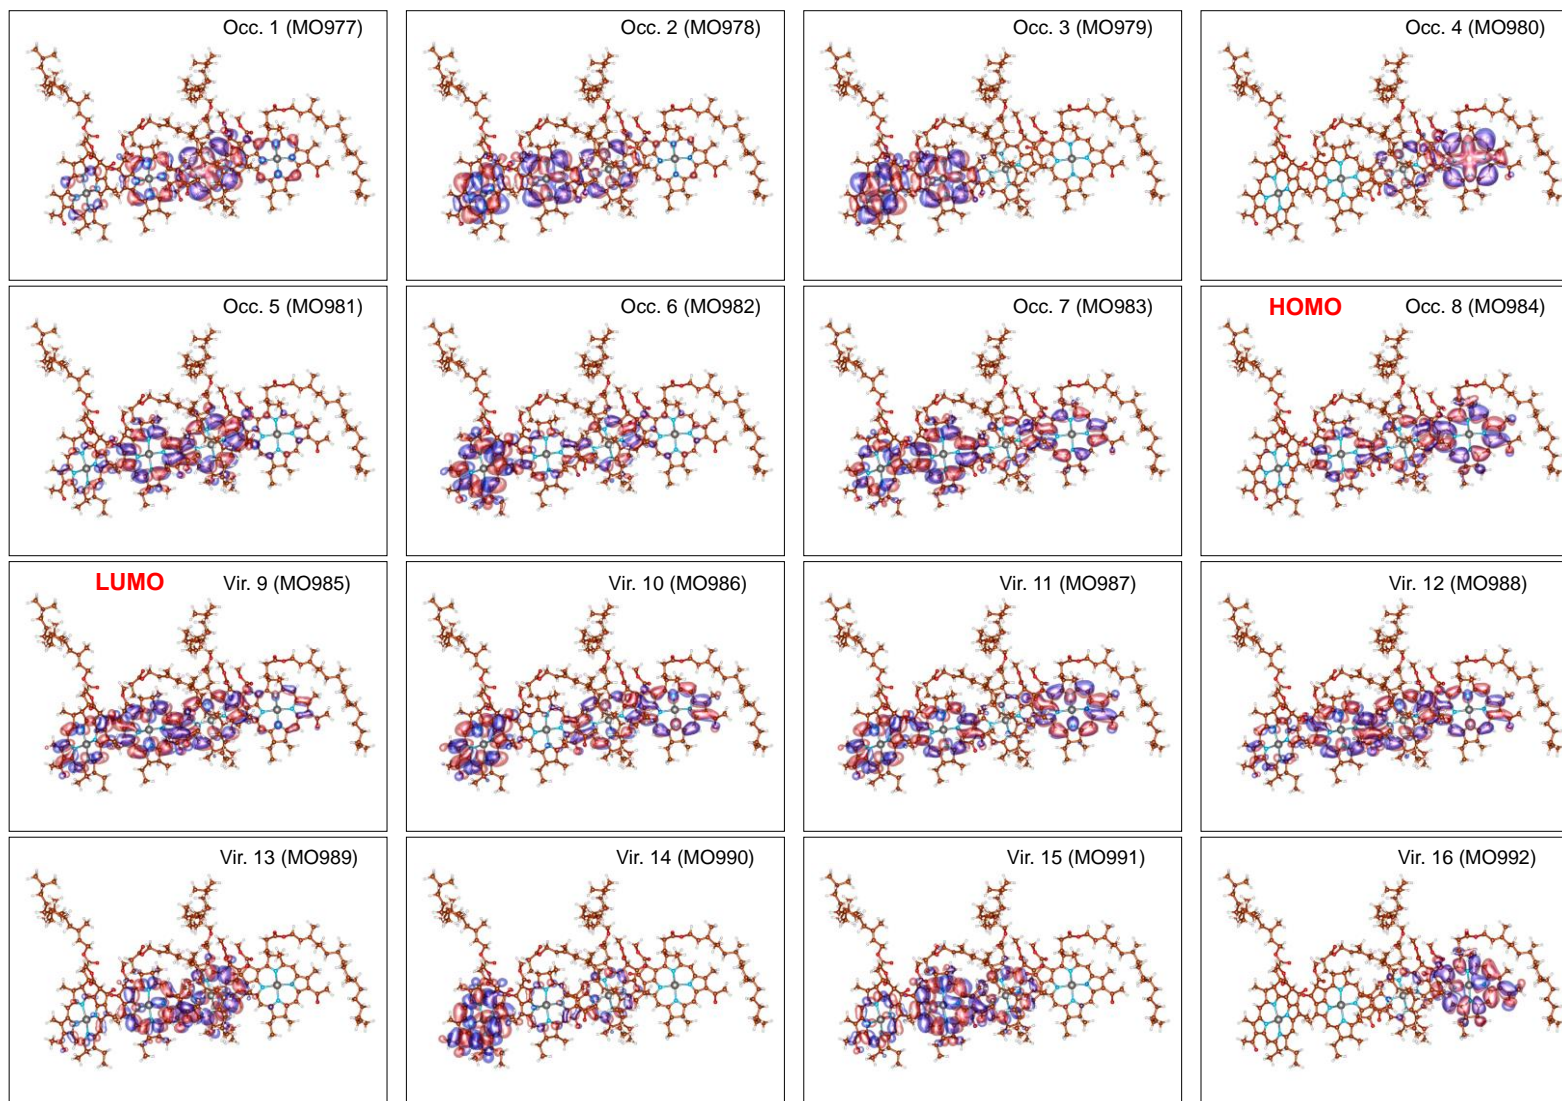

**Figure S5.** Plots of localized Kohn–Sham orbitals for the BChl *a* 4-mer considered in the CI coefficient analysis (Table S4).

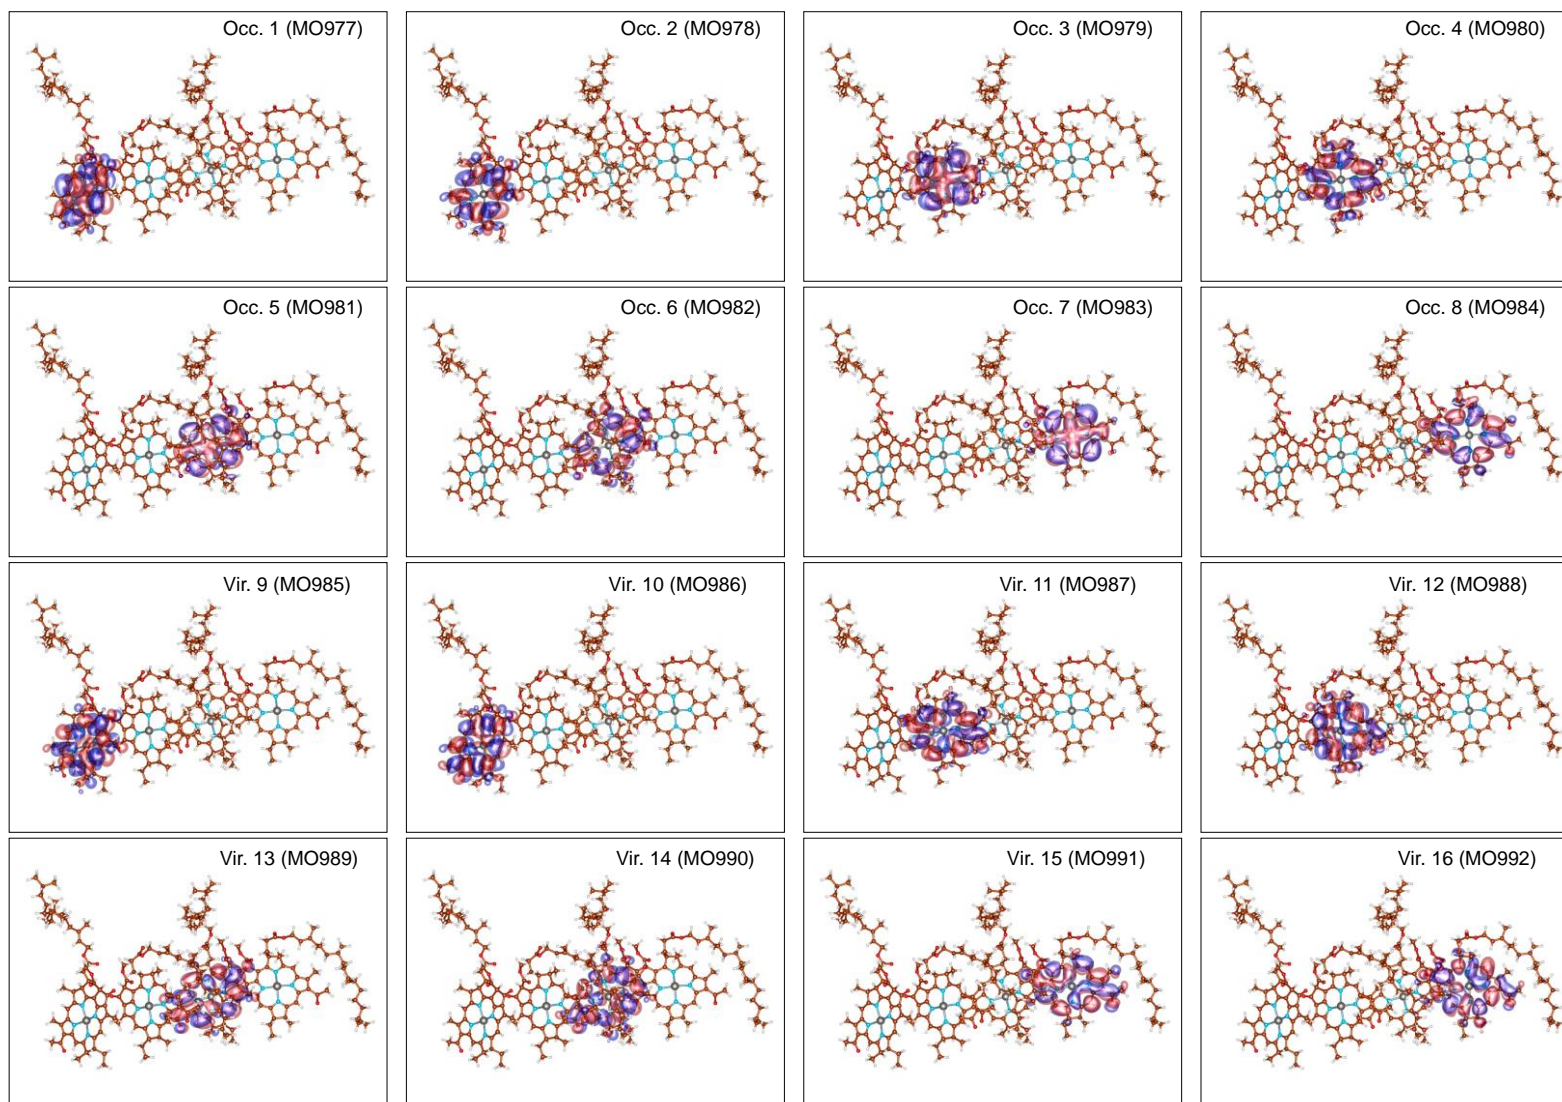

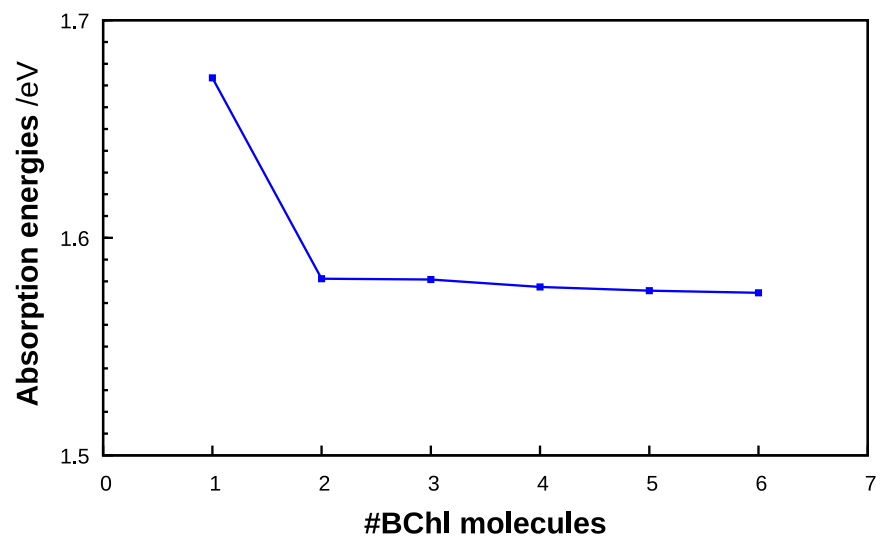

**Figure S6.** Calculated B850 BChl *a* absorption energies as a function of the number of BChl *a* molecules; TDDFT at the  $\omega$ B97X/6-31G\* level was employed. The BChl *a* arrangement considered in the multimer calculations was derived using the B850 structure as a template.

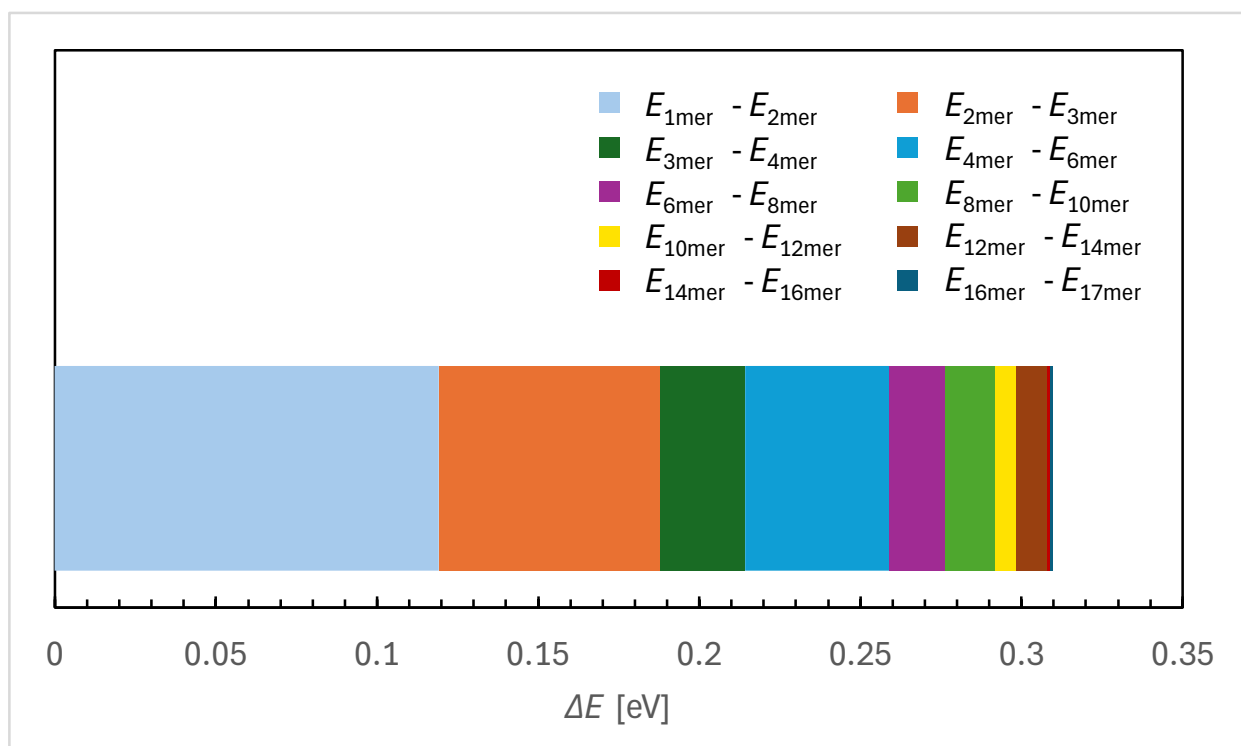

**Figure S7.** Differences in absorption energy between BChl *a* multimers shown in Figure 2 in the main text.

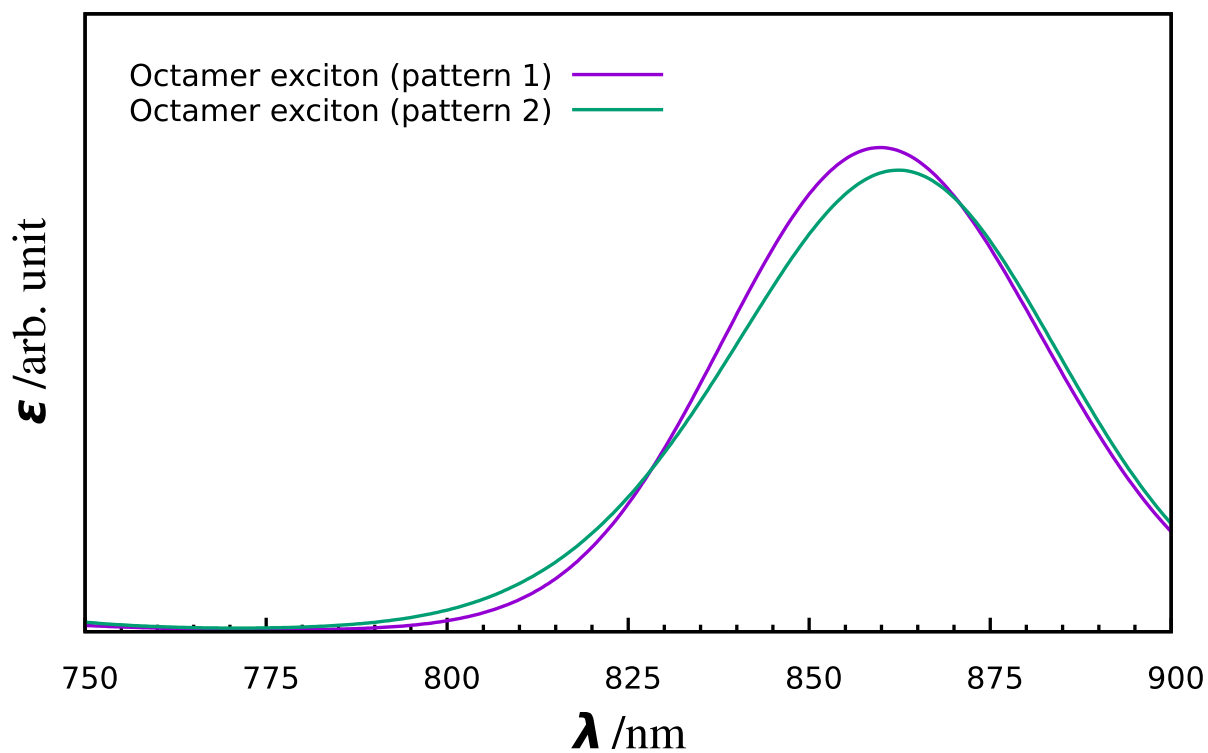

**Figure S8.** Theoretical absorption spectra of LH1 calculated with the octamer exciton model. Two patterns of building block (pattern 1: BChl *a* 1-to-8, 9-to-16, 17-to-24, and 25-to-32; and pattern 2: 5-to-12, 13-to-20, 21-to-28, and 29-to-4) were employed for the octamer exciton model calculations.

### Atomic coordinates of optimized BChl *a* molecules (Å)

| <b>BChl a</b> | <b>(chain:A,resid:101)</b> |         |         |
|---------------|----------------------------|---------|---------|
| MG            | 178.510                    | 124.489 | 123.276 |
| N             | 179.163                    | 126.363 | 122.339 |
| C             | 178.884                    | 126.800 | 121.064 |
| C             | 178.290                    | 125.991 | 120.127 |
| C             | 177.913                    | 126.295 | 118.677 |
| C             | 177.253                    | 124.960 | 118.147 |
| C             | 177.372                    | 123.995 | 119.212 |
| C             | 177.129                    | 122.669 | 119.595 |
| C             | 176.569                    | 121.555 | 118.769 |
| H             | 176.499                    | 121.859 | 117.723 |
| H             | 177.191                    | 120.655 | 118.834 |
| H             | 175.558                    | 121.278 | 119.090 |
| O             | 176.758                    | 124.895 | 117.028 |
| C             | 179.097                    | 126.592 | 117.783 |
| O             | 179.844                    | 125.770 | 117.305 |
| O             | 179.242                    | 127.930 | 117.544 |
| C             | 180.353                    | 128.255 | 116.704 |
| H             | 180.415                    | 129.343 | 116.701 |
| H             | 180.190                    | 127.884 | 115.688 |
| H             | 181.274                    | 127.820 | 117.101 |
| H             | 177.199                    | 127.118 | 118.601 |
| C             | 177.934                    | 124.647 | 120.342 |
| N             | 178.035                    | 123.832 | 121.400 |
| C             | 177.558                    | 122.601 | 120.968 |
| C             | 177.519                    | 121.483 | 121.825 |
| H             | 177.135                    | 120.571 | 121.396 |
| C             | 177.917                    | 121.404 | 123.144 |
| C             | 177.870                    | 120.116 | 123.951 |
| C             | 178.419                    | 120.544 | 125.334 |
| C             | 179.596                    | 119.702 | 125.842 |
| H             | 179.255                    | 118.694 | 126.095 |



|   |         |         |         |
|---|---------|---------|---------|
| H | 180.044 | 120.135 | 126.739 |
| H | 180.379 | 119.610 | 125.082 |
| H | 177.615 | 120.482 | 126.073 |
| C | 176.469 | 119.492 | 124.043 |
| C | 176.491 | 118.193 | 124.843 |
| H | 175.482 | 117.798 | 124.985 |
| H | 176.913 | 118.344 | 125.839 |
| H | 177.113 | 117.442 | 124.342 |
| H | 176.078 | 119.304 | 123.034 |
| H | 175.793 | 120.216 | 124.515 |
| H | 178.544 | 119.379 | 123.490 |
| N | 178.411 | 122.441 | 123.890 |
| C | 178.726 | 122.017 | 125.133 |
| C | 179.271 | 122.811 | 126.141 |
| H | 179.406 | 122.342 | 127.104 |
| C | 179.721 | 124.132 | 126.054 |
| C | 180.383 | 124.882 | 127.117 |
| C | 180.791 | 126.084 | 126.558 |
| C | 181.534 | 127.216 | 127.195 |
| H | 182.471 | 126.883 | 127.647 |
| H | 181.781 | 127.976 | 126.454 |
| H | 180.949 | 127.703 | 127.983 |
| C | 180.498 | 124.429 | 128.518 |
| O | 179.982 | 123.375 | 128.883 |
| C | 181.233 | 125.277 | 129.536 |
| H | 181.174 | 124.776 | 130.503 |
| H | 182.286 | 125.395 | 129.263 |
| H | 180.794 | 126.276 | 129.620 |
| N | 179.685 | 124.897 | 124.915 |
| C | 180.319 | 126.078 | 125.185 |
| C | 180.451 | 127.139 | 124.273 |
| H | 181.028 | 127.988 | 124.618 |
| C | 179.922 | 127.270 | 122.997 |
| C | 180.166 | 128.513 | 122.143 |

|   |         |         |         |
|---|---------|---------|---------|
| C | 181.648 | 128.819 | 121.945 |
| H | 182.164 | 128.991 | 122.893 |
| H | 182.125 | 127.968 | 121.451 |
| H | 181.784 | 129.709 | 121.318 |
| H | 179.688 | 129.372 | 122.624 |
| C | 179.434 | 128.192 | 120.816 |
| H | 180.165 | 128.133 | 119.997 |
| C | 178.394 | 129.256 | 120.416 |
| H | 177.723 | 129.459 | 121.257 |
| H | 177.769 | 128.904 | 119.595 |
| C | 179.127 | 130.527 | 119.989 |
| H | 179.859 | 130.284 | 119.207 |
| H | 179.720 | 130.937 | 120.818 |
| C | 178.274 | 131.651 | 119.455 |
| O | 177.070 | 131.725 | 119.402 |
| O | 179.097 | 132.654 | 118.999 |
| C | 178.458 | 133.845 | 118.507 |
| H | 177.579 | 134.058 | 119.128 |
| H | 178.099 | 133.674 | 117.486 |
| C | 179.482 | 134.933 | 118.610 |
| H | 180.071 | 134.864 | 119.523 |
| C | 179.716 | 135.967 | 117.792 |
| C | 178.965 | 136.221 | 116.511 |
| H | 179.655 | 136.363 | 115.669 |
| H | 178.292 | 135.400 | 116.256 |
| H | 178.364 | 137.139 | 116.580 |
| C | 180.713 | 137.023 | 118.233 |
| H | 181.321 | 136.607 | 119.045 |
| H | 180.154 | 137.862 | 118.677 |
| C | 181.654 | 137.634 | 117.178 |
| H | 182.315 | 138.322 | 117.723 |
| H | 181.078 | 138.263 | 116.487 |
| C | 182.516 | 136.647 | 116.369 |
| H | 181.949 | 136.287 | 115.497 |

|   |         |         |         |
|---|---------|---------|---------|
| H | 182.723 | 135.757 | 116.976 |
| C | 183.857 | 137.249 | 115.892 |
| C | 183.688 | 138.649 | 115.285 |
| H | 184.644 | 139.027 | 114.900 |
| H | 182.980 | 138.611 | 114.449 |
| H | 183.307 | 139.374 | 116.008 |
| H | 184.501 | 137.346 | 116.780 |
| C | 184.596 | 136.356 | 114.877 |
| H | 185.576 | 136.816 | 114.673 |
| H | 184.048 | 136.381 | 113.922 |
| C | 184.812 | 134.899 | 115.304 |
| H | 183.871 | 134.343 | 115.216 |
| H | 185.076 | 134.869 | 116.369 |
| C | 185.927 | 134.183 | 114.527 |
| H | 185.984 | 133.143 | 114.876 |
| H | 186.889 | 134.644 | 114.796 |
| C | 185.822 | 134.170 | 112.988 |
| C | 184.475 | 133.609 | 112.511 |
| H | 184.407 | 133.566 | 111.418 |
| H | 184.324 | 132.591 | 112.888 |
| H | 183.636 | 134.218 | 112.863 |
| H | 185.906 | 135.210 | 112.629 |
| C | 187.009 | 133.358 | 112.425 |
| H | 186.856 | 132.308 | 112.701 |
| H | 187.930 | 133.666 | 112.942 |
| C | 187.243 | 133.459 | 110.908 |
| H | 186.281 | 133.409 | 110.384 |
| H | 187.822 | 132.591 | 110.568 |
| C | 187.992 | 134.730 | 110.498 |
| H | 188.982 | 134.718 | 110.977 |
| H | 187.466 | 135.597 | 110.917 |
| C | 188.182 | 134.909 | 108.981 |
| C | 186.858 | 135.092 | 108.226 |
| H | 187.039 | 135.200 | 107.149 |

|   |         |         |         |
|---|---------|---------|---------|
| H | 186.188 | 134.239 | 108.355 |
| H | 186.322 | 135.989 | 108.564 |
| H | 188.656 | 133.992 | 108.603 |
| C | 189.140 | 136.070 | 108.672 |
| H | 190.104 | 135.933 | 109.177 |
| H | 189.332 | 136.150 | 107.594 |
| H | 188.718 | 137.030 | 109.006 |

|               |         |         |                            |
|---------------|---------|---------|----------------------------|
| <b>BChl a</b> |         |         | <b>(chain:B,resid:101)</b> |
| MG            | 171.935 | 122.805 | 117.015                    |
| N             | 171.984 | 124.757 | 116.108                    |
| C             | 172.745 | 125.810 | 116.532                    |
| C             | 173.366 | 125.850 | 117.757                    |
| C             | 174.264 | 126.928 | 118.337                    |
| C             | 174.621 | 126.407 | 119.794                    |
| C             | 174.027 | 125.090 | 119.908                    |
| C             | 173.917 | 123.934 | 120.691                    |
| C             | 174.378 | 123.691 | 122.087                    |
| H             | 173.945 | 124.430 | 122.771                    |
| H             | 174.085 | 122.702 | 122.445                    |
| H             | 175.463 | 123.779 | 122.178                    |
| O             | 175.323 | 127.053 | 120.558                    |
| C             | 173.645 | 128.304 | 118.385                    |
| O             | 172.635 | 128.618 | 118.971                    |
| O             | 174.374 | 129.191 | 117.656                    |
| C             | 173.885 | 130.535 | 117.734                    |
| H             | 174.665 | 131.154 | 117.291                    |
| H             | 173.718 | 130.815 | 118.771                    |
| H             | 172.945 | 130.633 | 117.180                    |
| H             | 175.202 | 127.006 | 117.778                    |
| C             | 173.328 | 124.818 | 118.699                    |
| N             | 172.800 | 123.592 | 118.674                    |
| C             | 173.167 | 123.009 | 119.870                    |
| C             | 172.784 | 121.701 | 120.195                    |

|   |         |         |         |
|---|---------|---------|---------|
| H | 173.169 | 121.333 | 121.134 |
| C | 171.932 | 120.868 | 119.489 |
| C | 171.365 | 119.585 | 120.073 |
| C | 170.403 | 119.086 | 118.976 |
| C | 168.986 | 118.764 | 119.465 |
| H | 169.003 | 117.896 | 120.129 |
| H | 168.318 | 118.538 | 118.629 |
| H | 168.560 | 119.598 | 120.029 |
| H | 170.823 | 118.181 | 118.542 |
| C | 172.414 | 118.539 | 120.474 |
| C | 171.809 | 117.399 | 121.294 |
| H | 172.549 | 116.626 | 121.522 |
| H | 170.990 | 116.919 | 120.756 |
| H | 171.399 | 117.761 | 122.242 |
| H | 173.220 | 119.020 | 121.045 |
| H | 172.875 | 118.151 | 119.556 |
| H | 170.783 | 119.855 | 120.961 |
| N | 171.407 | 121.128 | 118.253 |
| C | 170.508 | 120.168 | 117.916 |
| C | 169.763 | 120.143 | 116.747 |
| H | 169.102 | 119.298 | 116.616 |
| C | 169.710 | 121.103 | 115.728 |
| C | 168.790 | 121.077 | 114.605 |
| C | 168.981 | 122.267 | 113.908 |
| C | 168.304 | 122.762 | 112.668 |
| H | 167.222 | 122.849 | 112.795 |
| H | 168.678 | 123.748 | 112.380 |
| H | 168.484 | 122.089 | 111.827 |
| C | 167.860 | 119.976 | 114.297 |
| O | 168.018 | 118.836 | 114.734 |
| C | 166.686 | 120.267 | 113.396 |
| H | 166.045 | 119.388 | 113.349 |
| H | 166.113 | 121.128 | 113.752 |
| H | 167.040 | 120.502 | 112.392 |

|   |         |         |         |
|---|---------|---------|---------|
| N | 170.443 | 122.263 | 115.693 |
| C | 170.022 | 122.981 | 114.598 |
| C | 170.517 | 124.245 | 114.228 |
| H | 170.124 | 124.672 | 113.311 |
| C | 171.396 | 125.052 | 114.923 |
| C | 171.719 | 126.479 | 114.495 |
| C | 170.505 | 127.385 | 114.699 |
| H | 169.666 | 127.055 | 114.077 |
| H | 170.180 | 127.366 | 115.746 |
| H | 170.764 | 128.416 | 114.440 |
| H | 172.024 | 126.510 | 113.444 |
| C | 172.872 | 126.857 | 115.451 |
| H | 172.738 | 127.868 | 115.854 |
| C | 174.272 | 126.758 | 114.824 |
| H | 174.312 | 125.895 | 114.150 |
| H | 175.008 | 126.593 | 115.616 |
| C | 174.672 | 128.035 | 114.086 |
| H | 175.744 | 128.006 | 113.853 |
| H | 174.479 | 128.880 | 114.750 |
| C | 173.937 | 128.296 | 112.796 |
| O | 173.331 | 129.324 | 112.548 |
| O | 174.078 | 127.271 | 111.932 |
| C | 173.507 | 127.440 | 110.600 |
| H | 174.330 | 127.205 | 109.922 |
| H | 173.239 | 128.486 | 110.489 |
| C | 172.341 | 126.545 | 110.330 |
| H | 172.584 | 125.539 | 110.001 |
| C | 171.052 | 126.907 | 110.410 |
| C | 170.572 | 128.250 | 110.903 |
| H | 169.798 | 128.107 | 111.669 |
| H | 171.358 | 128.865 | 111.342 |
| H | 170.094 | 128.812 | 110.087 |
| C | 169.938 | 125.958 | 110.030 |
| H | 169.102 | 126.553 | 109.633 |

|   |         |         |         |
|---|---------|---------|---------|
| H | 169.555 | 125.502 | 110.955 |
| C | 170.256 | 124.839 | 109.036 |
| H | 170.997 | 124.155 | 109.468 |
| H | 170.714 | 125.268 | 108.134 |
| C | 168.995 | 124.038 | 108.695 |
| H | 168.265 | 124.684 | 108.183 |
| H | 168.528 | 123.752 | 109.642 |
| C | 169.232 | 122.776 | 107.846 |
| C | 169.571 | 123.125 | 106.394 |
| H | 169.766 | 122.220 | 105.806 |
| H | 168.739 | 123.659 | 105.921 |
| H | 170.460 | 123.765 | 106.327 |
| H | 170.103 | 122.255 | 108.275 |
| C | 168.048 | 121.792 | 107.944 |
| H | 168.264 | 120.920 | 107.312 |
| H | 167.136 | 122.253 | 107.539 |
| C | 167.839 | 121.337 | 109.394 |
| H | 167.350 | 122.135 | 109.958 |
| H | 168.836 | 121.229 | 109.839 |
| C | 167.082 | 120.028 | 109.631 |
| H | 167.311 | 119.708 | 110.649 |
| H | 167.468 | 119.259 | 108.947 |
| C | 165.558 | 120.083 | 109.515 |
| C | 164.942 | 120.996 | 110.581 |
| H | 164.908 | 120.518 | 111.560 |
| H | 165.487 | 121.938 | 110.694 |
| H | 163.921 | 121.268 | 110.329 |
| H | 165.343 | 120.504 | 108.525 |
| C | 164.954 | 118.659 | 109.535 |
| H | 165.354 | 118.117 | 108.665 |
| H | 163.869 | 118.715 | 109.385 |
| C | 165.178 | 117.785 | 110.783 |
| H | 164.595 | 118.178 | 111.625 |
| H | 166.227 | 117.810 | 111.099 |

|   |         |         |         |
|---|---------|---------|---------|
| C | 164.785 | 116.333 | 110.477 |
| H | 165.386 | 116.017 | 109.613 |
| H | 163.735 | 116.304 | 110.149 |
| C | 164.991 | 115.293 | 111.592 |
| C | 163.999 | 115.463 | 112.743 |
| H | 164.257 | 114.823 | 113.594 |
| H | 163.985 | 116.498 | 113.089 |
| H | 162.988 | 115.186 | 112.422 |
| H | 166.001 | 115.438 | 111.999 |
| C | 164.888 | 113.873 | 111.024 |
| H | 165.612 | 113.709 | 110.218 |
| H | 165.067 | 113.121 | 111.799 |
| H | 163.886 | 113.686 | 110.615 |

**BChI a** (chain:D,resid:101)

|    |         |         |         |
|----|---------|---------|---------|
| MG | 163.722 | 123.100 | 114.026 |
| N  | 164.409 | 124.909 | 113.003 |
| C  | 163.835 | 125.513 | 111.904 |
| C  | 162.884 | 124.888 | 111.144 |
| C  | 162.195 | 125.366 | 109.868 |
| C  | 161.218 | 124.179 | 109.476 |
| C  | 161.453 | 123.127 | 110.428 |
| C  | 161.106 | 121.818 | 110.811 |
| C  | 160.165 | 120.875 | 110.132 |
| H  | 159.973 | 121.207 | 109.111 |
| H  | 160.572 | 119.858 | 110.092 |
| H  | 159.192 | 120.826 | 110.636 |
| O  | 160.441 | 124.272 | 108.529 |
| C  | 163.153 | 125.593 | 108.717 |
| O  | 163.724 | 124.738 | 108.079 |
| O  | 163.313 | 126.931 | 108.465 |
| C  | 164.196 | 127.256 | 107.389 |
| H  | 163.633 | 127.308 | 106.451 |
| H  | 164.989 | 126.510 | 107.301 |



|   |         |         |         |
|---|---------|---------|---------|
| H | 164.613 | 128.239 | 107.621 |
| H | 161.623 | 126.284 | 110.024 |
| C | 162.389 | 123.590 | 111.387 |
| N | 162.636 | 122.680 | 112.338 |
| C | 161.863 | 121.573 | 112.001 |
| C | 161.867 | 120.404 | 112.797 |
| H | 161.232 | 119.598 | 112.461 |
| C | 162.572 | 120.165 | 113.954 |
| C | 162.508 | 118.848 | 114.708 |
| C | 163.523 | 119.046 | 115.859 |
| C | 164.623 | 117.979 | 115.932 |
| H | 164.191 | 117.010 | 116.196 |
| H | 165.371 | 118.221 | 116.691 |
| H | 165.138 | 117.872 | 114.973 |
| H | 162.993 | 119.049 | 116.815 |
| C | 161.101 | 118.496 | 115.212 |
| C | 161.071 | 117.126 | 115.882 |
| H | 160.086 | 116.914 | 116.307 |
| H | 161.787 | 117.063 | 116.705 |
| H | 161.334 | 116.342 | 115.161 |
| H | 160.393 | 118.519 | 114.372 |
| H | 160.780 | 119.270 | 115.919 |
| H | 162.844 | 118.042 | 114.044 |
| N | 163.436 | 121.045 | 114.563 |
| C | 164.027 | 120.456 | 115.619 |
| C | 165.030 | 121.030 | 116.407 |
| H | 165.389 | 120.442 | 117.238 |
| C | 165.696 | 122.236 | 116.206 |
| C | 166.822 | 122.737 | 116.996 |
| C | 167.232 | 123.913 | 116.398 |
| C | 168.291 | 124.876 | 116.834 |
| H | 169.252 | 124.388 | 117.001 |
| H | 168.443 | 125.651 | 116.083 |
| H | 168.002 | 125.376 | 117.766 |

|   |         |         |         |
|---|---------|---------|---------|
| C | 167.356 | 122.078 | 118.211 |
| O | 166.879 | 121.017 | 118.602 |
| C | 168.490 | 122.710 | 118.987 |
| H | 168.652 | 122.127 | 119.893 |
| H | 169.412 | 122.696 | 118.396 |
| H | 168.268 | 123.747 | 119.256 |
| N | 165.428 | 123.117 | 115.183 |
| C | 166.347 | 124.125 | 115.258 |
| C | 166.406 | 125.218 | 114.381 |
| H | 167.253 | 125.880 | 114.510 |
| C | 165.516 | 125.581 | 113.378 |
| C | 165.754 | 126.802 | 112.491 |
| C | 167.029 | 126.647 | 111.671 |
| H | 167.912 | 126.534 | 112.307 |
| H | 166.943 | 125.755 | 111.038 |
| H | 167.185 | 127.517 | 111.018 |
| H | 165.826 | 127.706 | 113.103 |
| C | 164.494 | 126.841 | 111.594 |
| H | 164.784 | 126.862 | 110.537 |
| C | 163.616 | 128.082 | 111.851 |
| H | 163.570 | 128.291 | 112.924 |
| H | 162.591 | 127.915 | 111.506 |
| C | 164.230 | 129.281 | 111.105 |
| H | 164.077 | 129.163 | 110.029 |
| H | 165.315 | 129.288 | 111.287 |
| C | 163.752 | 130.641 | 111.548 |
| O | 163.731 | 131.052 | 112.687 |
| O | 163.405 | 131.416 | 110.473 |
| C | 163.090 | 132.802 | 110.774 |
| H | 162.567 | 132.837 | 111.731 |
| H | 162.425 | 133.115 | 109.970 |
| C | 164.362 | 133.592 | 110.817 |
| H | 165.002 | 133.342 | 111.660 |
| C | 164.809 | 134.482 | 109.918 |

|   |         |         |         |
|---|---------|---------|---------|
| C | 164.015 | 134.966 | 108.729 |
| H | 164.049 | 136.062 | 108.673 |
| H | 164.436 | 134.597 | 107.785 |
| H | 162.967 | 134.661 | 108.761 |
| C | 166.212 | 135.040 | 110.034 |
| H | 166.593 | 134.870 | 111.047 |
| H | 166.195 | 136.128 | 109.879 |
| C | 167.201 | 134.408 | 109.021 |
| H | 168.148 | 134.962 | 109.074 |
| H | 166.821 | 134.570 | 108.004 |
| C | 167.455 | 132.904 | 109.270 |
| H | 166.761 | 132.551 | 110.040 |
| H | 168.464 | 132.762 | 109.677 |
| C | 167.277 | 131.971 | 108.058 |
| C | 165.841 | 132.047 | 107.532 |
| H | 165.674 | 131.339 | 106.717 |
| H | 165.131 | 131.827 | 108.336 |
| H | 165.604 | 133.041 | 107.143 |
| H | 167.961 | 132.300 | 107.262 |
| C | 167.657 | 130.533 | 108.466 |
| H | 167.034 | 130.245 | 109.324 |
| H | 168.692 | 130.546 | 108.831 |
| C | 167.508 | 129.458 | 107.379 |
| H | 166.485 | 129.481 | 106.986 |
| H | 167.610 | 128.469 | 107.842 |
| C | 168.502 | 129.551 | 106.206 |
| H | 169.456 | 129.097 | 106.498 |
| H | 168.731 | 130.603 | 105.984 |
| C | 167.966 | 128.865 | 104.930 |
| C | 169.083 | 128.259 | 104.071 |
| H | 168.683 | 127.813 | 103.152 |
| H | 169.828 | 129.012 | 103.784 |
| H | 169.607 | 127.473 | 104.624 |
| H | 167.327 | 128.034 | 105.257 |

|   |         |         |         |
|---|---------|---------|---------|
| C | 167.071 | 129.839 | 104.131 |
| H | 166.416 | 130.355 | 104.843 |
| H | 166.407 | 129.275 | 103.464 |
| C | 167.849 | 130.876 | 103.304 |
| H | 168.273 | 130.383 | 102.421 |
| H | 168.712 | 131.234 | 103.878 |
| C | 167.012 | 132.079 | 102.847 |
| H | 166.103 | 131.720 | 102.344 |
| H | 167.577 | 132.647 | 102.087 |
| C | 166.607 | 133.054 | 103.968 |
| C | 167.816 | 133.677 | 104.676 |
| H | 167.495 | 134.376 | 105.457 |
| H | 168.447 | 132.926 | 105.157 |
| H | 168.438 | 134.232 | 103.957 |
| H | 166.029 | 132.499 | 104.716 |
| C | 165.708 | 134.164 | 103.419 |
| H | 164.878 | 133.751 | 102.837 |
| H | 165.294 | 134.775 | 104.230 |
| H | 166.289 | 134.831 | 102.764 |

| <b>BChl a</b> | <b>(chain:E,resid:102)</b> |         |         |
|---------------|----------------------------|---------|---------|
| MG            | 155.411                    | 122.833 | 110.131 |
| N             | 155.407                    | 124.872 | 109.486 |
| C             | 156.429                    | 125.762 | 109.661 |
| C             | 157.463                    | 125.579 | 110.537 |
| C             | 158.668                    | 126.453 | 110.784 |
| C             | 159.382                    | 125.781 | 112.042 |
| C             | 158.710                    | 124.507 | 112.243 |
| C             | 158.714                    | 123.281 | 112.919 |
| C             | 159.591                    | 122.811 | 114.026 |
| H             | 159.443                    | 123.417 | 114.928 |
| H             | 159.391                    | 121.770 | 114.288 |
| H             | 160.646                    | 122.897 | 113.761 |
| O             | 160.325                    | 126.312 | 112.601 |

|   |         |         |         |
|---|---------|---------|---------|
| C | 158.410 | 127.924 | 110.990 |
| O | 157.406 | 128.430 | 111.445 |
| O | 159.474 | 128.641 | 110.559 |
| C | 159.356 | 130.059 | 110.714 |
| H | 160.377 | 130.443 | 110.723 |
| H | 158.846 | 130.302 | 111.644 |
| H | 158.787 | 130.477 | 109.875 |
| H | 159.383 | 126.371 | 109.958 |
| C | 157.613 | 124.453 | 111.342 |
| N | 156.935 | 123.306 | 111.408 |
| C | 157.597 | 122.551 | 112.352 |
| C | 157.130 | 121.286 | 112.718 |
| H | 157.754 | 120.733 | 113.401 |
| C | 155.918 | 120.711 | 112.367 |
| C | 155.345 | 119.524 | 113.116 |
| C | 154.008 | 119.256 | 112.397 |
| C | 152.803 | 119.112 | 113.329 |
| H | 152.900 | 118.207 | 113.935 |
| H | 151.867 | 119.049 | 112.767 |
| H | 152.733 | 119.962 | 114.013 |
| H | 154.106 | 118.332 | 111.824 |
| C | 156.269 | 118.309 | 113.148 |
| C | 155.772 | 117.194 | 114.061 |
| H | 156.411 | 116.310 | 113.979 |
| H | 154.755 | 116.892 | 113.803 |
| H | 155.759 | 117.508 | 115.108 |
| H | 157.275 | 118.614 | 113.466 |
| H | 156.350 | 117.946 | 112.115 |
| H | 155.146 | 119.853 | 114.141 |
| N | 155.053 | 121.165 | 111.416 |
| C | 153.934 | 120.392 | 111.392 |
| C | 152.858 | 120.562 | 110.537 |
| H | 152.061 | 119.837 | 110.619 |
| C | 152.625 | 121.598 | 109.620 |

|   |         |         |         |
|---|---------|---------|---------|
| C | 151.398 | 121.793 | 108.868 |
| C | 151.515 | 123.031 | 108.232 |
| C | 150.535 | 123.745 | 107.352 |
| H | 149.568 | 123.882 | 107.842 |
| H | 150.899 | 124.739 | 107.084 |
| H | 150.356 | 123.201 | 106.416 |
| C | 150.286 | 120.839 | 108.802 |
| O | 150.381 | 119.679 | 109.206 |
| C | 148.971 | 121.277 | 108.205 |
| H | 148.284 | 120.433 | 108.262 |
| H | 148.551 | 122.131 | 108.746 |
| H | 149.087 | 121.570 | 107.158 |
| N | 153.467 | 122.660 | 109.408 |
| C | 152.807 | 123.547 | 108.590 |
| C | 153.298 | 124.823 | 108.247 |
| H | 152.646 | 125.448 | 107.646 |
| C | 154.455 | 125.428 | 108.693 |
| C | 154.800 | 126.875 | 108.396 |
| C | 154.058 | 127.870 | 109.290 |
| H | 152.981 | 127.829 | 109.094 |
| H | 154.244 | 127.660 | 110.348 |
| H | 154.422 | 128.881 | 109.082 |
| H | 154.559 | 127.086 | 107.364 |
| C | 156.310 | 126.913 | 108.705 |
| H | 156.593 | 127.863 | 109.162 |
| C | 157.231 | 126.622 | 107.508 |
| H | 156.828 | 125.788 | 106.932 |
| H | 158.221 | 126.322 | 107.866 |
| C | 157.389 | 127.854 | 106.618 |
| H | 157.945 | 127.616 | 105.705 |
| H | 157.923 | 128.614 | 107.187 |
| C | 156.050 | 128.449 | 106.286 |
| O | 155.646 | 129.506 | 106.721 |
| O | 155.324 | 127.661 | 105.453 |

|   |         |         |         |
|---|---------|---------|---------|
| C | 153.971 | 128.120 | 105.178 |
| H | 154.009 | 128.804 | 104.325 |
| H | 153.631 | 128.695 | 106.045 |
| C | 153.115 | 126.923 | 104.941 |
| H | 153.249 | 126.128 | 105.672 |
| C | 152.182 | 126.766 | 103.993 |
| C | 151.868 | 127.776 | 102.918 |
| H | 150.881 | 128.228 | 103.093 |
| H | 152.601 | 128.584 | 102.856 |
| H | 151.819 | 127.286 | 101.937 |
| C | 151.348 | 125.509 | 103.978 |
| H | 150.291 | 125.767 | 103.835 |
| H | 151.417 | 125.026 | 104.956 |
| C | 151.776 | 124.474 | 102.918 |
| H | 152.855 | 124.317 | 103.029 |
| H | 151.631 | 124.869 | 101.903 |
| C | 151.036 | 123.134 | 103.089 |
| H | 150.822 | 123.000 | 104.157 |
| H | 151.709 | 122.311 | 102.821 |
| C | 149.736 | 122.934 | 102.280 |
| C | 148.832 | 124.174 | 102.200 |
| H | 147.923 | 123.947 | 101.629 |
| H | 148.516 | 124.520 | 103.188 |
| H | 149.338 | 125.008 | 101.699 |
| H | 150.040 | 122.699 | 101.248 |
| C | 148.969 | 121.709 | 102.825 |
| H | 149.681 | 120.888 | 102.992 |
| H | 148.267 | 121.351 | 102.058 |
| C | 148.172 | 121.970 | 104.110 |
| H | 147.382 | 122.697 | 103.887 |
| H | 148.807 | 122.446 | 104.867 |
| C | 147.519 | 120.702 | 104.688 |
| H | 148.186 | 120.230 | 105.419 |
| H | 147.384 | 119.967 | 103.882 |

|   |         |         |         |
|---|---------|---------|---------|
| C | 146.139 | 120.987 | 105.302 |
| C | 146.174 | 121.946 | 106.493 |
| H | 145.161 | 122.117 | 106.863 |
| H | 146.738 | 121.533 | 107.327 |
| H | 146.607 | 122.919 | 106.242 |
| H | 145.574 | 121.479 | 104.496 |
| C | 145.371 | 119.705 | 105.639 |
| H | 145.381 | 119.065 | 104.749 |
| H | 144.317 | 119.958 | 105.815 |
| C | 145.873 | 118.866 | 106.824 |
| H | 145.613 | 119.353 | 107.773 |
| H | 146.967 | 118.779 | 106.807 |
| C | 145.252 | 117.473 | 106.729 |
| H | 145.595 | 117.033 | 105.781 |
| H | 144.159 | 117.578 | 106.637 |
| C | 145.525 | 116.460 | 107.844 |
| C | 144.755 | 116.778 | 109.129 |
| H | 144.976 | 116.053 | 109.919 |
| H | 145.006 | 117.770 | 109.510 |
| H | 143.673 | 116.744 | 108.948 |
| H | 146.600 | 116.466 | 108.077 |
| C | 145.135 | 115.076 | 107.317 |
| H | 145.892 | 114.673 | 106.638 |
| H | 144.996 | 114.364 | 108.131 |
| H | 144.192 | 115.138 | 106.760 |

| <b>BChl a</b> | <b>(chain:F,resid:101)</b> |         |         |
|---------------|----------------------------|---------|---------|
| MG            | 146.954                    | 124.696 | 110.202 |
| N             | 147.644                    | 126.378 | 109.011 |
| C             | 146.894                    | 127.162 | 108.160 |
| C             | 145.615                    | 126.843 | 107.793 |
| C             | 144.661                    | 127.577 | 106.866 |
| C             | 143.372                    | 126.617 | 106.778 |
| C             | 143.670                    | 125.488 | 107.614 |



|   |         |         |         |
|---|---------|---------|---------|
| C | 143.185 | 124.258 | 108.099 |
| C | 141.912 | 123.562 | 107.741 |
| H | 141.377 | 124.131 | 106.981 |
| H | 142.102 | 122.558 | 107.345 |
| H | 141.238 | 123.456 | 108.601 |
| O | 142.379 | 126.912 | 106.120 |
| C | 145.181 | 127.844 | 105.475 |
| O | 146.057 | 127.241 | 104.889 |
| O | 144.512 | 128.884 | 104.902 |
| C | 144.887 | 129.162 | 103.552 |
| H | 144.207 | 129.939 | 103.203 |
| H | 144.795 | 128.267 | 102.932 |
| H | 145.926 | 129.509 | 103.504 |
| H | 144.314 | 128.529 | 107.282 |
| C | 144.945 | 125.676 | 108.206 |
| N | 145.278 | 124.672 | 109.024 |
| C | 144.214 | 123.781 | 108.972 |
| C | 144.238 | 122.568 | 109.693 |
| H | 143.349 | 121.962 | 109.635 |
| C | 145.256 | 122.046 | 110.454 |
| C | 145.202 | 120.652 | 111.062 |
| C | 146.582 | 120.516 | 111.747 |
| C | 147.385 | 119.282 | 111.316 |
| H | 146.907 | 118.372 | 111.691 |
| H | 148.405 | 119.305 | 111.707 |
| H | 147.436 | 119.209 | 110.224 |
| H | 146.443 | 120.472 | 112.829 |
| C | 144.028 | 120.434 | 112.029 |
| C | 143.971 | 118.996 | 112.542 |
| H | 143.205 | 118.882 | 113.313 |
| H | 144.918 | 118.698 | 112.999 |
| H | 143.764 | 118.294 | 111.726 |
| H | 143.084 | 120.688 | 111.527 |
| H | 144.136 | 121.129 | 112.871 |

|   |         |         |         |
|---|---------|---------|---------|
| H | 145.115 | 119.916 | 110.248 |
| N | 146.452 | 122.668 | 110.727 |
| C | 147.247 | 121.845 | 111.438 |
| C | 148.544 | 122.141 | 111.867 |
| H | 149.034 | 121.398 | 112.478 |
| C | 149.320 | 123.253 | 111.549 |
| C | 150.718 | 123.462 | 111.932 |
| C | 151.140 | 124.605 | 111.282 |
| C | 152.490 | 125.245 | 111.284 |
| H | 153.267 | 124.546 | 110.969 |
| H | 152.512 | 126.088 | 110.597 |
| H | 152.774 | 125.619 | 112.272 |
| C | 151.472 | 122.613 | 112.878 |
| O | 150.954 | 121.612 | 113.361 |
| C | 152.881 | 122.986 | 113.288 |
| H | 153.201 | 122.298 | 114.071 |
| H | 153.573 | 122.902 | 112.443 |
| H | 152.934 | 124.011 | 113.665 |
| N | 148.909 | 124.290 | 110.745 |
| C | 149.986 | 125.110 | 110.551 |
| C | 149.978 | 126.253 | 109.744 |
| H | 150.921 | 126.775 | 109.645 |
| C | 148.922 | 126.803 | 109.029 |
| C | 149.135 | 127.950 | 108.050 |
| C | 149.934 | 127.464 | 106.839 |
| H | 150.886 | 127.031 | 107.160 |
| H | 149.373 | 126.690 | 106.303 |
| H | 150.130 | 128.289 | 106.140 |
| H | 149.673 | 128.772 | 108.534 |
| C | 147.694 | 128.341 | 107.655 |
| H | 147.605 | 128.409 | 106.563 |
| C | 147.228 | 129.678 | 108.250 |
| H | 147.397 | 129.694 | 109.332 |
| H | 146.153 | 129.808 | 108.089 |

|   |         |         |         |
|---|---------|---------|---------|
| C | 148.006 | 130.821 | 107.576 |
| H | 147.912 | 130.726 | 106.489 |
| H | 149.065 | 130.742 | 107.839 |
| C | 147.536 | 132.189 | 107.981 |
| O | 147.838 | 132.785 | 108.994 |
| O | 146.715 | 132.712 | 107.026 |
| C | 146.350 | 134.099 | 107.213 |
| H | 146.147 | 134.267 | 108.273 |
| H | 145.438 | 134.226 | 106.627 |
| C | 147.487 | 134.950 | 106.733 |
| H | 148.318 | 135.002 | 107.433 |
| C | 147.638 | 135.507 | 105.523 |
| C | 146.592 | 135.509 | 104.437 |
| H | 146.913 | 134.904 | 103.578 |
| H | 145.628 | 135.120 | 104.767 |
| H | 146.433 | 136.530 | 104.060 |
| C | 148.965 | 136.133 | 105.158 |
| H | 149.590 | 136.175 | 106.057 |
| H | 148.820 | 137.172 | 104.823 |
| C | 149.743 | 135.365 | 104.059 |
| H | 150.759 | 135.782 | 104.026 |
| H | 149.301 | 135.570 | 103.074 |
| C | 149.812 | 133.845 | 104.294 |
| H | 148.937 | 133.364 | 103.845 |
| H | 149.721 | 133.646 | 105.368 |
| C | 151.115 | 133.170 | 103.816 |
| C | 151.478 | 133.460 | 102.351 |
| H | 152.427 | 132.977 | 102.088 |
| H | 150.720 | 133.094 | 101.651 |
| H | 151.593 | 134.537 | 102.180 |
| H | 151.907 | 133.647 | 104.407 |
| C | 151.153 | 131.659 | 104.171 |
| H | 150.628 | 131.518 | 105.124 |
| H | 152.195 | 131.379 | 104.366 |

|   |         |         |         |
|---|---------|---------|---------|
| C | 150.600 | 130.660 | 103.137 |
| H | 150.649 | 129.661 | 103.588 |
| H | 151.274 | 130.630 | 102.271 |
| C | 149.175 | 130.935 | 102.651 |
| H | 149.159 | 131.903 | 102.143 |
| H | 148.510 | 131.052 | 103.518 |
| C | 148.542 | 129.876 | 101.714 |
| C | 149.537 | 129.160 | 100.788 |
| H | 149.016 | 128.450 | 100.135 |
| H | 150.094 | 129.854 | 100.146 |
| H | 150.265 | 128.586 | 101.367 |
| H | 148.119 | 129.097 | 102.361 |
| C | 147.350 | 130.510 | 100.946 |
| H | 146.931 | 131.299 | 101.579 |
| H | 146.556 | 129.763 | 100.847 |
| C | 147.604 | 131.053 | 99.523  |
| H | 146.642 | 131.409 | 99.132  |
| H | 147.871 | 130.201 | 98.890  |
| C | 148.682 | 132.144 | 99.304  |
| H | 149.155 | 131.960 | 98.328  |
| H | 149.482 | 132.028 | 100.041 |
| C | 148.232 | 133.623 | 99.304  |
| C | 147.262 | 133.940 | 98.156  |
| H | 147.045 | 135.015 | 98.108  |
| H | 147.672 | 133.628 | 97.187  |
| H | 146.302 | 133.431 | 98.292  |
| H | 149.147 | 134.214 | 99.132  |
| C | 147.636 | 134.078 | 100.639 |
| H | 148.309 | 133.877 | 101.477 |
| H | 147.414 | 135.153 | 100.631 |
| H | 146.698 | 133.554 | 100.827 |

**BChl a** (chain:G,resid:102)

|    |         |         |         |
|----|---------|---------|---------|
| MG | 137.823 | 126.276 | 109.476 |
|----|---------|---------|---------|

|   |         |         |         |
|---|---------|---------|---------|
| N | 137.994 | 128.308 | 108.800 |
| C | 139.174 | 128.956 | 108.571 |
| C | 140.384 | 128.501 | 109.025 |
| C | 141.741 | 129.144 | 108.868 |
| C | 142.695 | 128.271 | 109.788 |
| C | 141.893 | 127.164 | 110.278 |
| C | 141.875 | 125.974 | 111.022 |
| C | 142.955 | 125.344 | 111.833 |
| H | 143.302 | 126.026 | 112.617 |
| H | 142.611 | 124.430 | 112.323 |
| H | 143.827 | 125.096 | 111.223 |
| O | 143.868 | 128.571 | 109.938 |
| C | 141.790 | 130.591 | 109.282 |
| O | 141.191 | 131.077 | 110.215 |
| O | 142.586 | 131.318 | 108.464 |
| C | 142.632 | 132.710 | 108.809 |
| H | 143.438 | 133.140 | 108.213 |
| H | 142.830 | 132.840 | 109.872 |
| H | 141.669 | 133.171 | 108.574 |
| H | 142.120 | 129.074 | 107.844 |
| C | 140.574 | 127.336 | 109.778 |
| N | 139.751 | 126.347 | 110.134 |
| C | 140.521 | 125.483 | 110.894 |
| C | 139.964 | 124.327 | 111.467 |
| H | 140.629 | 123.696 | 112.047 |
| C | 138.637 | 123.937 | 111.428 |
| C | 138.135 | 122.695 | 112.135 |
| C | 136.608 | 122.780 | 111.977 |
| C | 135.839 | 122.735 | 113.299 |
| H | 135.975 | 121.760 | 113.778 |
| H | 134.769 | 122.896 | 113.146 |
| H | 136.207 | 123.493 | 113.996 |
| H | 136.278 | 121.940 | 111.372 |
| C | 138.730 | 121.395 | 111.579 |

|   |         |         |         |
|---|---------|---------|---------|
| C | 138.433 | 120.208 | 112.498 |
| H | 138.713 | 119.251 | 112.050 |
| H | 137.370 | 120.171 | 112.731 |
| H | 138.952 | 120.292 | 113.458 |
| H | 139.812 | 121.525 | 111.454 |
| H | 138.318 | 121.222 | 110.577 |
| H | 138.384 | 122.741 | 113.194 |
| N | 137.612 | 124.606 | 110.814 |
| C | 136.426 | 124.025 | 111.127 |
| C | 135.177 | 124.467 | 110.712 |
| H | 134.331 | 123.885 | 111.046 |
| C | 134.860 | 125.607 | 109.964 |
| C | 133.514 | 126.071 | 109.679 |
| C | 133.643 | 127.308 | 109.050 |
| C | 132.588 | 128.231 | 108.526 |
| H | 131.933 | 128.604 | 109.320 |
| H | 133.030 | 129.099 | 108.032 |
| H | 131.957 | 127.730 | 107.786 |
| C | 132.279 | 125.342 | 109.998 |
| O | 132.258 | 124.138 | 110.251 |
| C | 130.984 | 126.105 | 109.994 |
| H | 130.190 | 125.452 | 110.351 |
| H | 131.044 | 127.000 | 110.618 |
| H | 130.741 | 126.424 | 108.980 |
| N | 135.768 | 126.517 | 109.487 |
| C | 135.055 | 127.560 | 108.942 |
| C | 135.625 | 128.730 | 108.410 |
| H | 134.939 | 129.479 | 108.029 |
| C | 136.961 | 129.073 | 108.373 |
| C | 137.456 | 130.436 | 107.913 |
| C | 137.231 | 131.493 | 109.000 |
| H | 136.162 | 131.627 | 109.202 |
| H | 137.725 | 131.190 | 109.930 |
| H | 137.663 | 132.449 | 108.686 |

|   |         |         |         |
|---|---------|---------|---------|
| H | 136.949 | 130.734 | 106.995 |
| C | 138.959 | 130.165 | 107.692 |
| H | 139.574 | 131.017 | 107.995 |
| C | 139.291 | 129.759 | 106.242 |
| H | 138.457 | 129.172 | 105.844 |
| H | 140.174 | 129.115 | 106.256 |
| C | 139.617 | 130.945 | 105.319 |
| H | 139.597 | 130.627 | 104.272 |
| H | 140.619 | 131.297 | 105.568 |
| C | 138.673 | 132.100 | 105.526 |
| O | 138.955 | 133.097 | 106.165 |
| O | 137.467 | 131.880 | 104.965 |
| C | 136.394 | 132.822 | 105.280 |
| H | 136.310 | 133.498 | 104.426 |
| H | 136.696 | 133.405 | 106.150 |
| C | 135.132 | 132.054 | 105.529 |
| H | 134.840 | 131.948 | 106.570 |
| C | 134.403 | 131.437 | 104.588 |
| C | 134.754 | 131.481 | 103.121 |
| H | 134.016 | 132.068 | 102.557 |
| H | 135.744 | 131.899 | 102.936 |
| H | 134.735 | 130.469 | 102.696 |
| C | 133.229 | 130.566 | 104.971 |
| H | 133.028 | 130.663 | 106.044 |
| H | 133.545 | 129.527 | 104.820 |
| C | 131.931 | 130.788 | 104.176 |
| H | 132.138 | 130.671 | 103.105 |
| H | 131.597 | 131.826 | 104.312 |
| C | 130.792 | 129.835 | 104.584 |
| H | 129.924 | 130.029 | 103.938 |
| H | 130.473 | 130.084 | 105.604 |
| C | 131.136 | 128.333 | 104.524 |
| C | 131.680 | 127.915 | 103.153 |
| H | 131.867 | 126.836 | 103.123 |

|   |         |         |         |
|---|---------|---------|---------|
| H | 130.957 | 128.148 | 102.360 |
| H | 132.621 | 128.419 | 102.905 |
| H | 131.914 | 128.149 | 105.275 |
| C | 129.949 | 127.438 | 104.924 |
| H | 130.290 | 126.394 | 104.901 |
| H | 129.155 | 127.508 | 104.165 |
| C | 129.372 | 127.759 | 106.308 |
| H | 128.651 | 128.582 | 106.222 |
| H | 130.175 | 128.141 | 106.948 |
| C | 128.696 | 126.574 | 107.015 |
| H | 129.460 | 125.885 | 107.389 |
| H | 128.098 | 126.005 | 106.288 |
| C | 127.764 | 127.060 | 108.137 |
| C | 128.464 | 127.854 | 109.250 |
| H | 127.781 | 128.563 | 109.714 |
| H | 128.823 | 127.209 | 110.051 |
| H | 129.312 | 128.440 | 108.888 |
| H | 127.108 | 127.754 | 107.602 |
| C | 126.835 | 125.974 | 108.707 |
| H | 126.206 | 125.612 | 107.888 |
| H | 126.139 | 126.446 | 109.414 |
| C | 127.457 | 124.742 | 109.393 |
| H | 127.778 | 124.995 | 110.411 |
| H | 128.356 | 124.408 | 108.859 |
| C | 126.423 | 123.608 | 109.398 |
| H | 126.219 | 123.376 | 108.345 |
| H | 125.477 | 123.989 | 109.813 |
| C | 126.759 | 122.283 | 110.096 |
| C | 126.974 | 122.427 | 111.604 |
| H | 127.195 | 121.459 | 112.068 |
| H | 127.802 | 123.100 | 111.827 |
| H | 126.072 | 122.819 | 112.091 |
| H | 127.687 | 121.889 | 109.654 |
| C | 125.625 | 121.285 | 109.836 |



|   |         |         |         |
|---|---------|---------|---------|
| H | 125.415 | 121.164 | 108.768 |
| H | 125.857 | 120.301 | 110.255 |
| H | 124.697 | 121.641 | 110.300 |

|               |         |                            |         |
|---------------|---------|----------------------------|---------|
| <b>BChl a</b> |         | <b>(chain:I,resid:101)</b> |         |
| MG            | 130.415 | 129.498                    | 112.543 |
| N             | 130.999 | 131.190                    | 111.294 |
| C             | 130.166 | 132.165                    | 110.803 |
| C             | 128.802 | 132.074                    | 110.871 |
| C             | 127.763 | 133.052                    | 110.357 |
| C             | 126.362 | 132.335                    | 110.657 |
| C             | 126.685 | 131.067                    | 111.251 |
| C             | 126.154 | 129.876                    | 111.774 |
| C             | 124.724 | 129.441                    | 111.811 |
| H             | 124.087 | 130.201                    | 111.356 |
| H             | 124.580 | 128.497                    | 111.270 |
| H             | 124.367 | 129.287                    | 112.837 |
| O             | 125.289 | 132.873                    | 110.413 |
| C             | 127.859 | 133.347                    | 108.880 |
| O             | 128.099 | 132.554                    | 107.995 |
| O             | 127.614 | 134.666                    | 108.629 |
| C             | 127.602 | 135.016                    | 107.244 |
| H             | 127.282 | 136.057                    | 107.201 |
| H             | 126.902 | 134.387                    | 106.694 |
| H             | 128.597 | 134.894                    | 106.802 |
| H             | 127.781 | 134.006                    | 110.892 |
| C             | 128.093 | 130.980                    | 111.399 |
| N             | 128.472 | 129.841                    | 111.989 |
| C             | 127.296 | 129.135                    | 112.223 |
| C             | 127.318 | 127.852                    | 112.814 |
| H             | 126.359 | 127.363                    | 112.950 |
| C             | 128.427 | 127.124                    | 113.191 |
| C             | 128.330 | 125.709                    | 113.728 |
| C             | 129.808 | 125.295                    | 113.910 |

|   |         |         |         |
|---|---------|---------|---------|
| C | 130.207 | 123.994 | 113.203 |
| H | 129.702 | 123.143 | 113.669 |
| H | 131.283 | 123.813 | 113.266 |
| H | 129.924 | 124.014 | 112.145 |
| H | 130.016 | 125.177 | 114.974 |
| C | 127.512 | 125.592 | 115.022 |
| C | 127.342 | 124.136 | 115.445 |
| H | 126.835 | 124.058 | 116.411 |
| H | 128.306 | 123.633 | 115.554 |
| H | 126.775 | 123.587 | 114.684 |
| H | 126.526 | 126.056 | 114.877 |
| H | 128.016 | 126.162 | 115.812 |
| H | 127.851 | 125.079 | 112.966 |
| N | 129.737 | 127.533 | 113.091 |
| C | 130.564 | 126.529 | 113.452 |
| C | 131.961 | 126.569 | 113.418 |
| H | 132.477 | 125.693 | 113.782 |
| C | 132.786 | 127.571 | 112.909 |
| C | 134.246 | 127.519 | 112.811 |
| C | 134.638 | 128.662 | 112.140 |
| C | 136.017 | 129.118 | 111.783 |
| H | 136.563 | 128.363 | 111.214 |
| H | 135.978 | 130.021 | 111.175 |
| H | 136.609 | 129.351 | 112.675 |
| C | 135.101 | 126.455 | 113.376 |
| O | 134.602 | 125.471 | 113.913 |
| C | 136.610 | 126.571 | 113.318 |
| H | 137.037 | 125.748 | 113.892 |
| H | 136.966 | 126.498 | 112.285 |
| H | 136.964 | 127.520 | 113.729 |
| N | 132.335 | 128.745 | 112.352 |
| C | 133.425 | 129.412 | 111.863 |
| C | 133.375 | 130.636 | 111.185 |
| H | 134.317 | 131.012 | 110.807 |

|   |         |         |         |
|---|---------|---------|---------|
| C | 132.271 | 131.431 | 110.917 |
| C | 132.363 | 132.668 | 110.026 |
| C | 132.696 | 132.252 | 108.590 |
| H | 133.656 | 131.728 | 108.551 |
| H | 131.928 | 131.567 | 108.215 |
| H | 132.745 | 133.121 | 107.922 |
| H | 133.135 | 133.352 | 110.392 |
| C | 130.948 | 133.285 | 110.147 |
| H | 130.536 | 133.495 | 109.150 |
| C | 130.896 | 134.581 | 110.974 |
| H | 131.462 | 134.446 | 111.903 |
| H | 129.869 | 134.804 | 111.275 |
| C | 131.456 | 135.761 | 110.182 |
| H | 130.927 | 135.846 | 109.220 |
| H | 132.513 | 135.620 | 109.926 |
| C | 131.297 | 137.084 | 110.889 |
| O | 130.634 | 137.309 | 111.872 |
| O | 131.996 | 138.074 | 110.251 |
| C | 131.878 | 139.376 | 110.870 |
| H | 132.173 | 139.298 | 111.921 |
| H | 130.831 | 139.687 | 110.857 |
| C | 132.782 | 140.279 | 110.101 |
| H | 133.842 | 140.052 | 110.208 |
| C | 132.426 | 141.258 | 109.260 |
| C | 131.008 | 141.703 | 109.009 |
| H | 130.796 | 141.765 | 107.935 |
| H | 130.263 | 141.040 | 109.453 |
| H | 130.844 | 142.710 | 109.415 |
| C | 133.489 | 141.980 | 108.467 |
| H | 134.467 | 141.808 | 108.931 |
| H | 133.306 | 143.064 | 108.498 |
| C | 133.570 | 141.559 | 106.984 |
| H | 134.366 | 142.161 | 106.522 |
| H | 132.647 | 141.853 | 106.472 |

|   |         |         |         |
|---|---------|---------|---------|
| C | 133.869 | 140.067 | 106.731 |
| H | 134.545 | 139.703 | 107.515 |
| H | 134.443 | 139.988 | 105.797 |
| C | 132.676 | 139.084 | 106.645 |
| C | 133.178 | 137.727 | 106.133 |
| H | 132.377 | 136.979 | 106.142 |
| H | 133.556 | 137.802 | 105.104 |
| H | 133.991 | 137.343 | 106.758 |
| H | 132.290 | 138.929 | 107.658 |
| C | 131.493 | 139.609 | 105.798 |
| H | 130.986 | 140.400 | 106.361 |
| H | 130.757 | 138.801 | 105.705 |
| C | 131.860 | 140.151 | 104.397 |
| H | 131.718 | 139.374 | 103.638 |
| H | 132.929 | 140.384 | 104.378 |
| C | 131.065 | 141.413 | 104.006 |
| H | 130.917 | 142.029 | 104.904 |
| H | 130.060 | 141.126 | 103.669 |
| C | 131.726 | 142.303 | 102.927 |
| C | 131.939 | 141.524 | 101.621 |
| H | 132.185 | 142.188 | 100.785 |
| H | 132.747 | 140.791 | 101.718 |
| H | 131.029 | 140.977 | 101.351 |
| H | 131.015 | 143.117 | 102.706 |
| C | 133.000 | 142.961 | 103.499 |
| H | 133.702 | 142.183 | 103.819 |
| H | 132.704 | 143.479 | 104.420 |
| C | 133.772 | 143.960 | 102.618 |
| H | 134.367 | 144.595 | 103.288 |
| H | 133.065 | 144.640 | 102.116 |
| C | 134.720 | 143.338 | 101.580 |
| H | 134.141 | 142.914 | 100.752 |
| H | 135.248 | 142.489 | 102.037 |
| C | 135.769 | 144.316 | 101.012 |

|   |         |         |         |
|---|---------|---------|---------|
| C | 136.908 | 144.579 | 102.008 |
| H | 137.628 | 145.306 | 101.614 |
| H | 136.533 | 144.959 | 102.964 |
| H | 137.454 | 143.650 | 102.214 |
| H | 135.262 | 145.276 | 100.818 |
| C | 136.334 | 143.797 | 99.682  |
| H | 135.539 | 143.678 | 98.933  |
| H | 137.097 | 144.470 | 99.273  |
| H | 136.802 | 142.815 | 99.822  |

**BChl a** (chain:J,resid:102)

|    |         |         |         |
|----|---------|---------|---------|
| MG | 121.922 | 132.715 | 114.632 |
| N  | 122.220 | 134.748 | 113.992 |
| C  | 123.379 | 135.255 | 113.467 |
| C  | 124.584 | 134.606 | 113.560 |
| C  | 125.951 | 135.117 | 113.164 |
| C  | 126.959 | 133.976 | 113.659 |
| C  | 126.133 | 132.954 | 114.267 |
| C  | 126.122 | 131.699 | 114.887 |
| C  | 127.266 | 130.831 | 115.281 |
| H  | 127.943 | 131.359 | 115.961 |
| H  | 126.933 | 129.924 | 115.789 |
| H  | 127.861 | 130.533 | 114.414 |
| O  | 128.163 | 134.038 | 113.472 |
| C  | 126.257 | 136.437 | 113.834 |
| O  | 125.785 | 136.820 | 114.885 |
| O  | 127.118 | 137.177 | 113.109 |
| C  | 127.465 | 138.418 | 113.738 |
| H  | 128.215 | 138.871 | 113.094 |
| H  | 127.880 | 138.243 | 114.730 |
| H  | 126.576 | 139.047 | 113.841 |
| H  | 126.097 | 135.229 | 112.084 |
| C  | 124.777 | 133.370 | 114.184 |
| N  | 123.934 | 132.480 | 114.713 |

|   |         |         |         |
|---|---------|---------|---------|
| C | 124.722 | 131.429 | 115.135 |
| C | 124.172 | 130.292 | 115.743 |
| H | 124.879 | 129.514 | 115.989 |
| C | 122.850 | 130.085 | 116.100 |
| C | 122.388 | 128.889 | 116.919 |
| C | 120.898 | 129.184 | 117.177 |
| C | 120.498 | 129.154 | 118.656 |
| H | 120.561 | 128.133 | 119.043 |
| H | 119.474 | 129.511 | 118.800 |
| H | 121.168 | 129.777 | 119.255 |
| H | 120.302 | 128.442 | 116.651 |
| C | 122.613 | 127.534 | 116.229 |
| C | 122.377 | 126.358 | 117.178 |
| H | 122.377 | 125.399 | 116.654 |
| H | 121.416 | 126.456 | 117.687 |
| H | 123.144 | 126.309 | 117.955 |
| H | 123.628 | 127.483 | 115.815 |
| H | 121.927 | 127.481 | 115.373 |
| H | 122.909 | 128.902 | 117.884 |
| N | 121.815 | 130.944 | 115.852 |
| C | 120.689 | 130.509 | 116.471 |
| C | 119.478 | 131.179 | 116.496 |
| H | 118.672 | 130.692 | 117.024 |
| C | 119.179 | 132.454 | 116.005 |
| C | 117.934 | 133.156 | 116.250 |
| C | 118.094 | 134.445 | 115.742 |
| C | 117.130 | 135.591 | 115.727 |
| H | 116.857 | 135.906 | 116.739 |
| H | 117.560 | 136.457 | 115.220 |
| H | 116.203 | 135.338 | 115.200 |
| C | 116.749 | 132.558 | 116.877 |
| O | 116.606 | 131.340 | 117.003 |
| C | 115.658 | 133.471 | 117.364 |
| H | 114.893 | 132.868 | 117.850 |

|   |         |         |         |
|---|---------|---------|---------|
| H | 116.040 | 134.223 | 118.060 |
| H | 115.208 | 134.000 | 116.522 |
| N | 120.049 | 133.276 | 115.336 |
| C | 119.417 | 134.490 | 115.173 |
| C | 119.989 | 135.600 | 114.525 |
| H | 119.383 | 136.497 | 114.464 |
| C | 121.260 | 135.706 | 113.993 |
| C | 121.830 | 137.023 | 113.489 |
| C | 122.195 | 137.898 | 114.693 |
| H | 121.293 | 138.215 | 115.226 |
| H | 122.838 | 137.344 | 115.385 |
| H | 122.765 | 138.769 | 114.361 |
| H | 121.117 | 137.539 | 112.844 |
| C | 123.112 | 136.572 | 112.761 |
| H | 123.921 | 137.296 | 112.884 |
| C | 122.950 | 136.208 | 111.272 |
| H | 122.150 | 135.470 | 111.210 |
| H | 123.877 | 135.706 | 110.991 |
| C | 122.664 | 137.325 | 110.221 |
| H | 121.847 | 137.018 | 109.563 |
| H | 123.558 | 137.482 | 109.613 |
| C | 122.332 | 138.647 | 110.847 |
| O | 123.168 | 139.417 | 111.275 |
| O | 121.005 | 138.862 | 110.926 |
| C | 120.581 | 140.041 | 111.658 |
| H | 120.621 | 140.887 | 110.959 |
| H | 121.304 | 140.236 | 112.450 |
| C | 119.210 | 139.818 | 112.223 |
| H | 119.109 | 139.996 | 113.291 |
| C | 118.142 | 139.403 | 111.528 |
| C | 118.198 | 139.106 | 110.048 |
| H | 117.270 | 139.426 | 109.557 |
| H | 119.046 | 139.586 | 109.555 |
| H | 118.300 | 138.029 | 109.872 |

|   |         |         |         |
|---|---------|---------|---------|
| C | 116.811 | 139.170 | 112.199 |
| H | 116.038 | 139.730 | 111.648 |
| H | 116.822 | 139.573 | 113.217 |
| C | 116.389 | 137.688 | 112.234 |
| H | 117.057 | 137.136 | 112.907 |
| H | 116.533 | 137.258 | 111.237 |
| C | 114.927 | 137.512 | 112.656 |
| H | 114.298 | 138.119 | 111.985 |
| H | 114.785 | 137.930 | 113.663 |
| C | 114.397 | 136.067 | 112.627 |
| C | 114.582 | 135.413 | 111.251 |
| H | 114.169 | 134.399 | 111.246 |
| H | 114.057 | 135.989 | 110.476 |
| H | 115.634 | 135.338 | 110.959 |
| H | 114.964 | 135.489 | 113.368 |
| C | 112.910 | 136.033 | 113.032 |
| H | 112.445 | 135.126 | 112.622 |
| H | 112.404 | 136.877 | 112.539 |
| C | 112.621 | 136.072 | 114.541 |
| H | 111.610 | 136.478 | 114.683 |
| H | 113.294 | 136.778 | 115.046 |
| C | 112.671 | 134.695 | 115.231 |
| H | 113.703 | 134.337 | 115.304 |
| H | 112.141 | 133.976 | 114.591 |
| C | 111.980 | 134.729 | 116.610 |
| C | 112.856 | 135.231 | 117.758 |
| H | 112.259 | 135.281 | 118.675 |
| H | 113.685 | 134.564 | 117.974 |
| H | 113.269 | 136.226 | 117.563 |
| H | 111.188 | 135.468 | 116.468 |
| C | 111.214 | 133.453 | 116.993 |
| H | 110.665 | 133.108 | 116.111 |
| H | 110.451 | 133.748 | 117.727 |
| C | 111.939 | 132.232 | 117.574 |



|   |         |         |         |
|---|---------|---------|---------|
| H | 112.480 | 132.505 | 118.488 |
| H | 112.684 | 131.837 | 116.871 |
| C | 110.863 | 131.182 | 117.875 |
| H | 110.317 | 130.986 | 116.941 |
| H | 110.127 | 131.640 | 118.555 |
| C | 111.260 | 129.827 | 118.469 |
| C | 111.951 | 129.944 | 119.828 |
| H | 112.186 | 128.956 | 120.240 |
| H | 112.885 | 130.504 | 119.751 |
| H | 111.301 | 130.448 | 120.555 |
| H | 111.956 | 129.333 | 117.776 |
| C | 109.988 | 128.985 | 118.592 |
| H | 109.567 | 128.733 | 117.612 |
| H | 110.167 | 128.058 | 119.142 |
| H | 109.222 | 129.553 | 119.135 |

**BChl a** (chain:K,resid:101)

|    |         |         |         |
|----|---------|---------|---------|
| MG | 116.496 | 136.432 | 119.936 |
| N  | 116.993 | 138.203 | 118.759 |
| C  | 116.280 | 139.366 | 118.660 |
| C  | 115.010 | 139.497 | 119.185 |
| C  | 114.079 | 140.702 | 119.149 |
| C  | 112.725 | 140.183 | 119.828 |
| C  | 112.984 | 138.801 | 120.210 |
| C  | 112.434 | 137.662 | 120.798 |
| C  | 111.057 | 137.465 | 121.345 |
| H  | 110.453 | 138.363 | 121.205 |
| H  | 110.545 | 136.621 | 120.866 |
| H  | 111.077 | 137.252 | 122.423 |
| O  | 111.738 | 140.881 | 119.961 |
| C  | 113.781 | 141.243 | 117.768 |
| O  | 113.871 | 140.628 | 116.724 |
| O  | 113.362 | 142.522 | 117.841 |
| C  | 112.995 | 143.112 | 116.585 |

|   |         |         |         |
|---|---------|---------|---------|
| H | 112.611 | 144.104 | 116.828 |
| H | 112.228 | 142.512 | 116.094 |
| H | 113.868 | 143.186 | 115.931 |
| H | 114.453 | 141.524 | 119.770 |
| C | 114.312 | 138.468 | 119.832 |
| N | 114.617 | 137.198 | 120.139 |
| C | 113.491 | 136.674 | 120.754 |
| C | 113.458 | 135.357 | 121.243 |
| H | 112.542 | 135.040 | 121.723 |
| C | 114.476 | 134.419 | 121.203 |
| C | 114.314 | 133.006 | 121.739 |
| C | 115.682 | 132.352 | 121.419 |
| C | 115.622 | 131.092 | 120.549 |
| H | 115.061 | 130.301 | 121.061 |
| H | 116.629 | 130.705 | 120.364 |
| H | 115.158 | 131.289 | 119.580 |
| H | 116.176 | 132.088 | 122.360 |
| C | 113.964 | 132.942 | 123.236 |
| C | 113.579 | 131.528 | 123.673 |
| H | 113.451 | 131.459 | 124.760 |
| H | 114.362 | 130.808 | 123.405 |
| H | 112.657 | 131.198 | 123.186 |
| H | 113.149 | 133.637 | 123.467 |
| H | 114.840 | 133.276 | 123.810 |
| H | 113.515 | 132.499 | 121.187 |
| N | 115.717 | 134.606 | 120.666 |
| C | 116.470 | 133.481 | 120.778 |
| C | 117.774 | 133.322 | 120.329 |
| H | 118.241 | 132.369 | 120.533 |
| C | 118.572 | 134.229 | 119.614 |
| C | 119.924 | 134.001 | 119.120 |
| C | 120.284 | 135.139 | 118.403 |
| C | 121.582 | 135.468 | 117.732 |
| H | 121.848 | 134.730 | 116.966 |

|   |         |         |         |
|---|---------|---------|---------|
| H | 121.547 | 136.441 | 117.248 |
| H | 122.408 | 135.490 | 118.453 |
| C | 120.734 | 132.804 | 119.400 |
| O | 120.318 | 131.909 | 120.130 |
| C | 122.119 | 132.661 | 118.791 |
| H | 122.550 | 131.717 | 119.128 |
| H | 122.070 | 132.657 | 117.695 |
| H | 122.782 | 133.480 | 119.083 |
| N | 118.151 | 135.473 | 119.213 |
| C | 119.163 | 136.039 | 118.478 |
| C | 119.102 | 137.312 | 117.889 |
| H | 119.942 | 137.586 | 117.263 |
| C | 118.123 | 138.279 | 118.012 |
| C | 118.190 | 139.587 | 117.238 |
| C | 118.034 | 139.367 | 115.728 |
| H | 118.840 | 138.735 | 115.342 |
| H | 117.082 | 138.869 | 115.526 |
| H | 118.055 | 140.324 | 115.196 |
| H | 119.158 | 140.062 | 117.433 |
| C | 117.028 | 140.407 | 117.849 |
| H | 116.372 | 140.793 | 117.064 |
| C | 117.530 | 141.589 | 118.697 |
| H | 118.234 | 141.223 | 119.457 |
| H | 116.695 | 142.048 | 119.239 |
| C | 118.220 | 142.621 | 117.790 |
| H | 117.536 | 142.921 | 116.993 |
| H | 119.102 | 142.158 | 117.334 |
| C | 118.687 | 143.831 | 118.554 |
| O | 119.635 | 143.864 | 119.309 |
| O | 117.902 | 144.898 | 118.283 |
| C | 118.256 | 146.133 | 118.969 |
| H | 118.540 | 145.871 | 119.993 |
| H | 117.325 | 146.694 | 118.969 |
| C | 119.361 | 146.825 | 118.241 |

|   |         |         |         |
|---|---------|---------|---------|
| H | 120.323 | 146.321 | 118.309 |
| C | 119.254 | 147.919 | 117.473 |
| C | 117.998 | 148.740 | 117.319 |
| H | 117.828 | 149.005 | 116.271 |
| H | 117.105 | 148.222 | 117.676 |
| H | 118.095 | 149.681 | 117.876 |
| C | 120.422 | 148.371 | 116.629 |
| H | 121.351 | 147.937 | 117.021 |
| H | 120.524 | 149.462 | 116.679 |
| C | 120.247 | 147.948 | 115.149 |
| H | 121.049 | 148.410 | 114.562 |
| H | 119.311 | 148.373 | 114.768 |
| C | 120.254 | 146.417 | 114.936 |
| H | 120.248 | 145.908 | 115.908 |
| H | 121.191 | 146.123 | 114.448 |
| C | 119.074 | 145.865 | 114.113 |
| C | 117.744 | 146.019 | 114.863 |
| H | 116.911 | 145.590 | 114.297 |
| H | 117.795 | 145.503 | 115.829 |
| H | 117.500 | 147.066 | 115.062 |
| H | 119.016 | 146.449 | 113.189 |
| C | 119.329 | 144.387 | 113.757 |
| H | 119.271 | 143.807 | 114.693 |
| H | 120.362 | 144.267 | 113.407 |
| C | 118.405 | 143.729 | 112.715 |
| H | 117.357 | 143.989 | 112.908 |
| H | 118.461 | 142.641 | 112.867 |
| C | 118.769 | 143.990 | 111.242 |
| H | 118.133 | 143.341 | 110.624 |
| H | 119.799 | 143.635 | 111.086 |
| C | 118.666 | 145.441 | 110.734 |
| C | 117.251 | 146.007 | 110.908 |
| H | 117.162 | 147.011 | 110.484 |
| H | 116.509 | 145.363 | 110.421 |

|   |         |         |         |
|---|---------|---------|---------|
| H | 116.976 | 146.067 | 111.967 |
| H | 119.348 | 146.045 | 111.344 |
| C | 119.197 | 145.568 | 109.290 |
| H | 120.194 | 145.109 | 109.290 |
| H | 119.351 | 146.631 | 109.061 |
| C | 118.343 | 144.929 | 108.177 |
| H | 117.828 | 144.046 | 108.577 |
| H | 119.006 | 144.549 | 107.389 |
| C | 117.326 | 145.873 | 107.522 |
| H | 117.848 | 146.791 | 107.220 |
| H | 116.567 | 146.176 | 108.256 |
| C | 116.615 | 145.277 | 106.295 |
| C | 115.789 | 144.036 | 106.657 |
| H | 115.257 | 143.641 | 105.783 |
| H | 116.412 | 143.224 | 107.049 |
| H | 115.037 | 144.269 | 107.424 |
| H | 117.390 | 144.962 | 105.578 |
| C | 115.730 | 146.331 | 105.616 |
| H | 116.309 | 147.210 | 105.319 |
| H | 115.246 | 145.913 | 104.725 |
| H | 114.936 | 146.657 | 106.301 |

| <b>BChI a</b> | <b>(chain:N,resid:102)</b> |         |         |
|---------------|----------------------------|---------|---------|
| MG            | 109.654                    | 140.615 | 125.079 |
| N             | 110.014                    | 142.661 | 124.512 |
| C             | 111.015                    | 143.095 | 123.686 |
| C             | 112.068                    | 142.291 | 123.311 |
| C             | 113.307                    | 142.666 | 122.526 |
| C             | 114.239                    | 141.358 | 122.579 |
| C             | 113.484                    | 140.380 | 123.322 |
| C             | 113.475                    | 139.065 | 123.800 |
| C             | 114.545                    | 138.031 | 123.744 |
| H             | 114.803                    | 137.770 | 122.715 |
| H             | 115.461                    | 138.393 | 124.224 |

|   |         |         |         |
|---|---------|---------|---------|
| H | 114.251 | 137.112 | 124.256 |
| O | 115.336 | 141.298 | 122.045 |
| C | 114.028 | 143.825 | 123.157 |
| O | 113.938 | 144.166 | 124.319 |
| O | 114.811 | 144.468 | 122.270 |
| C | 115.585 | 145.504 | 122.879 |
| H | 116.125 | 145.986 | 122.066 |
| H | 116.285 | 145.080 | 123.597 |
| H | 114.932 | 146.197 | 123.415 |
| H | 113.133 | 142.886 | 121.467 |
| C | 112.254 | 140.966 | 123.727 |
| N | 111.500 | 140.119 | 124.430 |
| C | 112.200 | 138.931 | 124.457 |
| C | 111.688 | 137.785 | 125.081 |
| H | 112.280 | 136.892 | 124.963 |
| C | 110.547 | 137.690 | 125.851 |
| C | 110.221 | 136.466 | 126.690 |
| C | 108.926 | 136.874 | 127.421 |
| C | 108.966 | 136.652 | 128.935 |
| H | 109.015 | 135.583 | 129.161 |
| H | 108.081 | 137.065 | 129.426 |
| H | 109.851 | 137.127 | 129.368 |
| H | 108.098 | 136.296 | 127.008 |
| C | 110.093 | 135.155 | 125.903 |
| C | 109.878 | 133.946 | 126.816 |
| H | 109.779 | 133.017 | 126.247 |
| H | 108.972 | 134.063 | 127.413 |
| H | 110.710 | 133.817 | 127.514 |
| H | 110.991 | 135.001 | 125.291 |
| H | 109.250 | 135.258 | 125.207 |
| H | 111.026 | 136.350 | 127.425 |
| N | 109.643 | 138.697 | 126.060 |
| C | 108.721 | 138.312 | 126.974 |
| C | 107.682 | 139.098 | 127.448 |

|   |         |         |         |
|---|---------|---------|---------|
| H | 107.020 | 138.640 | 128.167 |
| C | 107.412 | 140.444 | 127.172 |
| C | 106.394 | 141.241 | 127.835 |
| C | 106.560 | 142.552 | 127.390 |
| C | 105.842 | 143.801 | 127.802 |
| H | 105.915 | 143.965 | 128.881 |
| H | 106.266 | 144.682 | 127.317 |
| H | 104.776 | 143.769 | 127.547 |
| C | 105.389 | 140.710 | 128.764 |
| O | 105.244 | 139.508 | 128.980 |
| C | 104.468 | 141.671 | 129.462 |
| H | 103.791 | 141.098 | 130.096 |
| H | 105.030 | 142.381 | 130.075 |
| H | 103.881 | 142.241 | 128.740 |
| N | 108.129 | 141.241 | 126.315 |
| C | 107.635 | 142.520 | 126.429 |
| C | 108.134 | 143.635 | 125.732 |
| H | 107.648 | 144.585 | 125.928 |
| C | 109.222 | 143.695 | 124.878 |
| C | 109.735 | 145.008 | 124.307 |
| C | 110.346 | 145.904 | 125.387 |
| H | 109.655 | 146.064 | 126.217 |
| H | 111.261 | 145.448 | 125.783 |
| H | 110.591 | 146.877 | 124.950 |
| H | 108.915 | 145.551 | 123.830 |
| C | 110.809 | 144.546 | 123.293 |
| H | 111.734 | 145.114 | 123.438 |
| C | 110.394 | 144.670 | 121.820 |
| H | 109.407 | 144.220 | 121.667 |
| H | 111.104 | 144.108 | 121.204 |
| C | 110.387 | 146.125 | 121.319 |
| H | 110.298 | 146.117 | 120.226 |
| H | 111.323 | 146.617 | 121.598 |
| C | 109.268 | 146.988 | 121.855 |

|   |         |         |         |
|---|---------|---------|---------|
| O | 109.410 | 147.979 | 122.539 |
| O | 108.071 | 146.519 | 121.429 |
| C | 106.898 | 147.245 | 121.852 |
| H | 106.209 | 147.146 | 121.005 |
| H | 107.160 | 148.299 | 121.970 |
| C | 106.317 | 146.651 | 123.104 |
| H | 106.603 | 145.621 | 123.301 |
| C | 105.451 | 147.263 | 123.921 |
| C | 104.987 | 148.685 | 123.695 |
| H | 105.766 | 149.307 | 123.243 |
| H | 104.112 | 148.726 | 123.031 |
| H | 104.685 | 149.147 | 124.641 |
| C | 104.825 | 146.546 | 125.094 |
| H | 104.978 | 147.148 | 126.002 |
| H | 105.325 | 145.586 | 125.262 |
| C | 103.311 | 146.312 | 124.918 |
| H | 103.159 | 145.578 | 124.115 |
| H | 102.839 | 147.243 | 124.579 |
| C | 102.633 | 145.832 | 126.206 |
| H | 102.712 | 146.619 | 126.971 |
| H | 103.200 | 144.978 | 126.595 |
| C | 101.153 | 145.428 | 126.060 |
| C | 100.276 | 146.597 | 125.596 |
| H | 99.237  | 146.273 | 125.463 |
| H | 100.277 | 147.398 | 126.345 |
| H | 100.616 | 147.021 | 124.646 |
| H | 101.096 | 144.640 | 125.292 |
| C | 100.613 | 144.841 | 127.380 |
| H | 99.515  | 144.820 | 127.350 |
| H | 100.883 | 145.517 | 128.203 |
| C | 101.124 | 143.424 | 127.650 |
| H | 102.219 | 143.428 | 127.626 |
| H | 100.794 | 142.787 | 126.819 |
| C | 100.677 | 142.784 | 128.965 |



|   |         |         |         |
|---|---------|---------|---------|
| H | 101.102 | 141.780 | 129.030 |
| H | 99.586  | 142.648 | 128.955 |
| C | 101.040 | 143.572 | 130.230 |
| C | 102.516 | 143.968 | 130.364 |
| H | 102.651 | 144.781 | 131.082 |
| H | 103.113 | 143.138 | 130.734 |
| H | 102.955 | 144.311 | 129.423 |
| H | 100.463 | 144.498 | 130.147 |
| C | 100.558 | 142.831 | 131.490 |
| H | 99.461  | 142.840 | 131.498 |
| H | 100.866 | 143.411 | 132.367 |
| C | 101.025 | 141.359 | 131.661 |
| H | 101.676 | 141.272 | 132.536 |
| H | 101.635 | 141.030 | 130.812 |
| C | 99.807  | 140.441 | 131.808 |
| H | 99.184  | 140.576 | 130.912 |
| H | 99.202  | 140.809 | 132.649 |
| C | 100.013 | 138.933 | 132.008 |
| C | 100.875 | 138.575 | 133.222 |
| H | 101.033 | 137.495 | 133.284 |
| H | 101.860 | 139.052 | 133.191 |
| H | 100.373 | 138.872 | 134.150 |
| H | 100.510 | 138.523 | 131.119 |
| C | 98.629  | 138.290 | 132.145 |
| H | 97.987  | 138.495 | 131.284 |
| H | 98.692  | 137.206 | 132.257 |
| H | 98.116  | 138.697 | 133.025 |

|               |         |                            |         |
|---------------|---------|----------------------------|---------|
| <b>BChl a</b> |         | <b>(chain:O,resid:101)</b> |         |
| MG            | 106.744 | 144.360                    | 132.141 |
| N             | 107.209 | 146.201                    | 131.065 |
| C             | 106.636 | 147.438                    | 131.261 |
| C             | 105.544 | 147.625                    | 132.063 |
| C             | 104.757 | 148.904                    | 132.312 |

|   |         |         |         |
|---|---------|---------|---------|
| C | 103.614 | 148.469 | 133.320 |
| C | 103.752 | 147.050 | 133.511 |
| C | 103.217 | 145.911 | 134.137 |
| C | 102.010 | 145.814 | 135.014 |
| H | 101.311 | 146.619 | 134.783 |
| H | 101.486 | 144.862 | 134.880 |
| H | 102.263 | 145.916 | 136.077 |
| O | 102.829 | 149.286 | 133.790 |
| C | 104.103 | 149.435 | 131.056 |
| O | 103.237 | 148.880 | 130.419 |
| O | 104.618 | 150.650 | 130.696 |
| C | 104.036 | 151.221 | 129.520 |
| H | 104.715 | 152.015 | 129.204 |
| H | 103.052 | 151.643 | 129.749 |
| H | 103.934 | 150.467 | 128.736 |
| H | 105.364 | 149.698 | 132.753 |
| C | 104.885 | 146.612 | 132.780 |
| N | 105.097 | 145.299 | 132.908 |
| C | 104.079 | 144.838 | 133.734 |
| C | 103.973 | 143.471 | 134.068 |
| H | 103.169 | 143.204 | 134.739 |
| C | 104.767 | 142.433 | 133.635 |
| C | 104.524 | 140.991 | 134.033 |
| C | 105.616 | 140.218 | 133.259 |
| C | 105.087 | 139.084 | 132.373 |
| H | 104.751 | 138.248 | 132.992 |
| H | 105.853 | 138.706 | 131.692 |
| H | 104.233 | 139.417 | 131.775 |
| H | 106.317 | 139.789 | 133.978 |
| C | 104.597 | 140.757 | 135.549 |
| C | 104.277 | 139.308 | 135.893 |
| H | 104.388 | 139.115 | 136.964 |
| H | 104.942 | 138.613 | 135.376 |
| H | 103.256 | 139.066 | 135.575 |

|   |         |         |         |
|---|---------|---------|---------|
| H | 103.895 | 141.429 | 136.061 |
| H | 105.603 | 141.021 | 135.899 |
| H | 103.527 | 140.684 | 133.686 |
| N | 105.849 | 142.542 | 132.796 |
| C | 106.359 | 141.322 | 132.529 |
| C | 107.438 | 141.064 | 131.680 |
| H | 107.739 | 140.032 | 131.587 |
| C | 108.158 | 141.959 | 130.886 |
| C | 109.230 | 141.609 | 129.952 |
| C | 109.587 | 142.780 | 129.305 |
| C | 110.601 | 142.990 | 128.226 |
| H | 110.444 | 142.313 | 127.383 |
| H | 110.553 | 144.009 | 127.839 |
| H | 111.621 | 142.820 | 128.587 |
| C | 109.807 | 140.257 | 129.793 |
| O | 109.395 | 139.315 | 130.465 |
| C | 110.928 | 140.012 | 128.804 |
| H | 111.266 | 138.982 | 128.923 |
| H | 110.572 | 140.143 | 127.778 |
| H | 111.770 | 140.692 | 128.962 |
| N | 107.922 | 143.310 | 130.818 |
| C | 108.763 | 143.834 | 129.875 |
| C | 108.810 | 145.189 | 129.513 |
| H | 109.489 | 145.448 | 128.709 |
| C | 108.092 | 146.252 | 130.044 |
| C | 108.150 | 147.652 | 129.437 |
| C | 107.584 | 147.664 | 128.022 |
| H | 108.111 | 146.959 | 127.378 |
| H | 106.527 | 147.373 | 128.056 |
| H | 107.648 | 148.664 | 127.574 |
| H | 109.182 | 148.016 | 129.419 |
| C | 107.272 | 148.495 | 130.387 |
| H | 106.483 | 148.998 | 129.813 |
| C | 108.058 | 149.599 | 131.117 |

|   |         |         |         |
|---|---------|---------|---------|
| H | 109.015 | 149.208 | 131.475 |
| H | 107.511 | 149.969 | 131.989 |
| C | 108.287 | 150.738 | 130.109 |
| H | 107.328 | 151.203 | 129.868 |
| H | 108.689 | 150.308 | 129.181 |
| C | 109.273 | 151.800 | 130.513 |
| O | 110.441 | 151.629 | 130.788 |
| O | 108.693 | 153.036 | 130.459 |
| C | 109.567 | 154.171 | 130.636 |
| H | 110.384 | 153.887 | 131.305 |
| H | 108.946 | 154.933 | 131.107 |
| C | 110.090 | 154.611 | 129.303 |
| H | 110.698 | 153.859 | 128.800 |
| C | 109.879 | 155.781 | 128.684 |
| C | 109.103 | 156.933 | 129.276 |
| H | 108.436 | 157.384 | 128.531 |
| H | 108.494 | 156.641 | 130.132 |
| H | 109.785 | 157.730 | 129.605 |
| C | 110.450 | 156.005 | 127.295 |
| H | 111.425 | 155.510 | 127.219 |
| H | 110.632 | 157.079 | 127.134 |
| C | 109.556 | 155.469 | 126.157 |
| H | 109.406 | 154.392 | 126.312 |
| H | 110.106 | 155.576 | 125.212 |
| C | 108.188 | 156.151 | 126.035 |
| H | 108.339 | 157.230 | 125.868 |
| H | 107.654 | 156.054 | 126.988 |
| C | 107.288 | 155.578 | 124.926 |
| C | 107.936 | 155.665 | 123.534 |
| H | 107.223 | 155.387 | 122.749 |
| H | 108.307 | 156.673 | 123.312 |
| H | 108.787 | 154.982 | 123.456 |
| H | 107.166 | 154.506 | 125.140 |
| C | 105.856 | 156.160 | 124.986 |

|   |         |         |         |
|---|---------|---------|---------|
| H | 105.395 | 155.807 | 125.918 |
| H | 105.267 | 155.713 | 124.173 |
| C | 105.664 | 157.687 | 124.937 |
| H | 106.159 | 158.158 | 125.797 |
| H | 104.591 | 157.879 | 125.073 |
| C | 106.141 | 158.372 | 123.647 |
| H | 105.957 | 157.709 | 122.792 |
| H | 107.229 | 158.507 | 123.695 |
| C | 105.476 | 159.736 | 123.370 |
| C | 104.043 | 159.575 | 122.845 |
| H | 103.554 | 160.549 | 122.722 |
| H | 104.033 | 159.054 | 121.879 |
| H | 103.431 | 158.987 | 123.536 |
| H | 105.416 | 160.274 | 124.327 |
| C | 106.331 | 160.606 | 122.426 |
| H | 107.256 | 160.900 | 122.937 |
| H | 105.792 | 161.545 | 122.210 |
| C | 106.750 | 159.947 | 121.110 |
| H | 105.866 | 159.650 | 120.532 |
| H | 107.293 | 159.022 | 121.331 |
| C | 107.641 | 160.873 | 120.277 |
| H | 108.427 | 161.279 | 120.927 |
| H | 107.048 | 161.750 | 119.973 |
| C | 108.311 | 160.228 | 119.045 |
| C | 109.547 | 159.412 | 119.448 |
| H | 110.041 | 158.992 | 118.568 |
| H | 110.282 | 160.034 | 119.970 |
| H | 109.279 | 158.580 | 120.109 |
| H | 108.654 | 161.044 | 118.392 |
| C | 107.336 | 159.355 | 118.242 |
| H | 106.396 | 159.887 | 118.020 |
| H | 107.786 | 159.027 | 117.298 |
| H | 107.058 | 158.454 | 118.798 |

| <b>BChI a</b> | <b>(chain:P,resid:102)</b> |         |         |
|---------------|----------------------------|---------|---------|
| MG            | 102.565                    | 148.707 | 139.277 |
| N             | 103.174                    | 150.707 | 138.774 |
| C             | 103.906                    | 151.070 | 137.675 |
| C             | 104.623                    | 150.167 | 136.929 |
| C             | 105.568                    | 150.422 | 135.774 |
| C             | 106.268                    | 149.006 | 135.515 |
| C             | 105.586                    | 148.071 | 136.375 |
| C             | 105.468                    | 146.727 | 136.740 |
| C             | 106.262                    | 145.554 | 136.276 |
| H             | 107.332                    | 145.714 | 136.451 |
| H             | 105.976                    | 144.638 | 136.797 |
| H             | 106.142                    | 145.386 | 135.204 |
| O             | 107.176                    | 148.847 | 134.716 |
| C             | 106.592                    | 151.481 | 136.070 |
| O             | 107.014                    | 151.775 | 137.168 |
| O             | 106.993                    | 152.103 | 134.939 |
| C             | 107.978                    | 153.116 | 135.171 |
| H             | 108.333                    | 153.416 | 134.186 |
| H             | 108.796                    | 152.718 | 135.768 |
| H             | 107.527                    | 153.954 | 135.713 |
| H             | 105.049                    | 150.694 | 134.848 |
| C             | 104.659                    | 148.791 | 137.174 |
| N             | 103.983                    | 147.999 | 138.010 |
| C             | 104.436                    | 146.720 | 137.750 |
| C             | 103.956                    | 145.616 | 138.463 |
| H             | 104.299                    | 144.654 | 138.117 |
| C             | 103.157                    | 145.634 | 139.591 |
| C             | 102.934                    | 144.401 | 140.447 |
| C             | 102.045                    | 144.925 | 141.592 |
| C             | 102.539                    | 144.569 | 142.996 |
| H             | 102.461                    | 143.490 | 143.156 |
| H             | 101.951                    | 145.072 | 143.768 |
| H             | 103.587                    | 144.855 | 143.124 |

|   |         |         |         |
|---|---------|---------|---------|
| H | 101.046 | 144.510 | 141.463 |
| C | 102.326 | 143.213 | 139.693 |
| C | 102.257 | 141.939 | 140.534 |
| H | 101.771 | 141.127 | 139.987 |
| H | 101.689 | 142.103 | 141.452 |
| H | 103.253 | 141.594 | 140.826 |
| H | 102.907 | 143.016 | 138.782 |
| H | 101.320 | 143.509 | 139.370 |
| H | 103.908 | 144.102 | 140.852 |
| N | 102.568 | 146.740 | 140.137 |
| C | 101.943 | 146.411 | 141.295 |
| C | 101.262 | 147.293 | 142.122 |
| H | 100.800 | 146.868 | 143.000 |
| C | 101.151 | 148.685 | 142.010 |
| C | 100.554 | 149.562 | 143.004 |
| C | 100.800 | 150.869 | 142.582 |
| C | 100.442 | 152.167 | 143.239 |
| H | 100.886 | 152.257 | 144.234 |
| H | 100.789 | 153.019 | 142.651 |
| H | 99.358  | 152.272 | 143.354 |
| C | 99.822  | 149.113 | 144.196 |
| O | 99.451  | 147.948 | 144.350 |
| C | 99.502  | 150.118 | 145.273 |
| H | 99.007  | 149.599 | 146.093 |
| H | 100.409 | 150.609 | 145.636 |
| H | 98.834  | 150.897 | 144.898 |
| N | 101.698 | 149.442 | 141.005 |
| C | 101.508 | 150.764 | 141.334 |
| C | 101.993 | 151.850 | 140.584 |
| H | 101.789 | 152.840 | 140.976 |
| C | 102.764 | 151.816 | 139.437 |
| C | 103.358 | 153.065 | 138.804 |
| C | 104.581 | 153.550 | 139.587 |
| H | 104.295 | 153.836 | 140.605 |

|   |         |         |         |
|---|---------|---------|---------|
| H | 105.337 | 152.759 | 139.642 |
| H | 105.033 | 154.410 | 139.081 |
| H | 102.608 | 153.853 | 138.759 |
| C | 103.745 | 152.551 | 137.403 |
| H | 104.660 | 153.019 | 137.031 |
| C | 102.601 | 152.705 | 136.381 |
| H | 101.661 | 152.450 | 136.880 |
| H | 102.760 | 151.969 | 135.591 |
| C | 102.483 | 154.090 | 135.704 |
| H | 101.482 | 154.208 | 135.278 |
| H | 103.217 | 154.147 | 134.899 |
| C | 102.779 | 155.231 | 136.644 |
| O | 103.859 | 155.790 | 136.705 |
| O | 101.733 | 155.527 | 137.442 |
| C | 101.983 | 156.457 | 138.541 |
| H | 101.724 | 157.458 | 138.190 |
| H | 103.052 | 156.440 | 138.759 |
| C | 101.168 | 156.021 | 139.715 |
| H | 101.569 | 155.167 | 140.256 |
| C | 100.000 | 156.534 | 140.129 |
| C | 99.294  | 157.687 | 139.462 |
| H | 98.948  | 158.409 | 140.211 |
| H | 99.922  | 158.212 | 138.739 |
| H | 98.403  | 157.330 | 138.929 |
| C | 99.271  | 155.914 | 141.299 |
| H | 99.117  | 156.667 | 142.083 |
| H | 99.897  | 155.127 | 141.736 |
| C | 97.918  | 155.293 | 140.886 |
| H | 98.088  | 154.737 | 139.957 |
| H | 97.196  | 156.085 | 140.640 |
| C | 97.309  | 154.334 | 141.926 |
| H | 98.126  | 153.821 | 142.446 |
| H | 96.757  | 153.553 | 141.390 |
| C | 96.331  | 154.930 | 142.955 |



|   |        |         |         |
|---|--------|---------|---------|
| C | 96.879 | 156.165 | 143.684 |
| H | 96.179 | 156.502 | 144.459 |
| H | 97.836 | 155.960 | 144.176 |
| H | 97.033 | 157.000 | 142.991 |
| H | 95.442 | 155.255 | 142.392 |
| C | 95.864 | 153.832 | 143.941 |
| H | 95.584 | 152.936 | 143.368 |
| H | 94.947 | 154.171 | 144.444 |
| C | 96.892 | 153.462 | 145.015 |
| H | 97.070 | 154.345 | 145.642 |
| H | 97.857 | 153.235 | 144.550 |
| C | 96.475 | 152.297 | 145.932 |
| H | 96.738 | 151.337 | 145.473 |
| H | 95.381 | 152.291 | 146.044 |
| C | 97.097 | 152.452 | 147.332 |
| C | 98.628 | 152.503 | 147.339 |
| H | 98.983 | 152.938 | 148.273 |
| H | 99.073 | 151.511 | 147.265 |
| H | 99.036 | 153.116 | 146.531 |
| H | 96.741 | 153.440 | 147.654 |
| C | 96.553 | 151.464 | 148.376 |
| H | 95.470 | 151.615 | 148.440 |
| H | 96.945 | 151.750 | 149.362 |
| C | 96.797 | 149.955 | 148.180 |
| H | 97.831 | 149.696 | 148.442 |
| H | 96.660 | 149.670 | 147.129 |
| C | 95.788 | 149.195 | 149.050 |
| H | 94.795 | 149.492 | 148.692 |
| H | 95.864 | 149.568 | 150.083 |
| C | 95.801 | 147.661 | 149.097 |
| C | 97.046 | 147.089 | 149.778 |
| H | 97.042 | 145.995 | 149.762 |
| H | 97.962 | 147.423 | 149.285 |
| H | 97.086 | 147.391 | 150.832 |

|   |        |         |         |
|---|--------|---------|---------|
| H | 95.771 | 147.280 | 148.065 |
| C | 94.531 | 147.204 | 149.829 |
| H | 93.627 | 147.495 | 149.282 |
| H | 94.507 | 146.122 | 149.970 |
| H | 94.476 | 147.664 | 150.824 |

**BChI a** (chain:Q,resid:101)

|    |         |         |         |
|----|---------|---------|---------|
| MG | 102.893 | 152.195 | 147.293 |
| N  | 103.023 | 154.052 | 146.142 |
| C  | 102.845 | 155.334 | 146.621 |
| C  | 102.193 | 155.589 | 147.795 |
| C  | 101.900 | 156.914 | 148.475 |
| C  | 101.094 | 156.510 | 149.808 |
| C  | 101.032 | 155.074 | 149.806 |
| C  | 100.627 | 153.943 | 150.543 |
| C  | 99.864  | 153.901 | 151.828 |
| H  | 99.173  | 154.744 | 151.887 |
| H  | 99.276  | 152.983 | 151.921 |
| H  | 100.520 | 153.974 | 152.705 |
| O  | 100.697 | 157.340 | 150.619 |
| C  | 101.125 | 157.936 | 147.679 |
| O  | 100.523 | 157.759 | 146.640 |
| O  | 101.166 | 159.144 | 148.298 |
| C  | 100.346 | 160.151 | 147.701 |
| H  | 100.513 | 161.058 | 148.281 |
| H  | 99.294  | 159.862 | 147.748 |
| H  | 100.622 | 160.305 | 146.653 |
| H  | 102.817 | 157.412 | 148.809 |
| C  | 101.701 | 154.585 | 148.656 |
| N  | 101.757 | 153.248 | 148.634 |
| C  | 101.095 | 152.826 | 149.782 |
| C  | 100.922 | 151.452 | 150.071 |
| H  | 100.396 | 151.228 | 150.987 |
| C  | 101.307 | 150.367 | 149.320 |

|   |         |         |         |
|---|---------|---------|---------|
| C | 100.942 | 148.933 | 149.678 |
| C | 101.537 | 148.114 | 148.506 |
| C | 100.526 | 147.214 | 147.783 |
| H | 100.183 | 146.420 | 148.453 |
| H | 100.968 | 146.740 | 146.903 |
| H | 99.650  | 147.786 | 147.460 |
| H | 102.350 | 147.482 | 148.876 |
| C | 101.468 | 148.487 | 151.052 |
| C | 101.002 | 147.081 | 151.425 |
| H | 101.458 | 146.757 | 152.364 |
| H | 101.286 | 146.349 | 150.664 |
| H | 99.910  | 147.042 | 151.530 |
| H | 101.142 | 149.202 | 151.820 |
| H | 102.564 | 148.524 | 151.032 |
| H | 99.846  | 148.836 | 149.683 |
| N | 102.022 | 150.420 | 148.144 |
| C | 102.162 | 149.185 | 147.628 |
| C | 102.802 | 148.872 | 146.424 |
| H | 102.890 | 147.824 | 146.177 |
| C | 103.288 | 149.751 | 145.458 |
| C | 103.892 | 149.379 | 144.177 |
| C | 104.138 | 150.558 | 143.499 |
| C | 104.814 | 150.770 | 142.181 |
| H | 104.306 | 150.255 | 141.363 |
| H | 104.852 | 151.831 | 141.934 |
| H | 105.847 | 150.409 | 142.208 |
| C | 104.178 | 147.990 | 143.743 |
| O | 103.839 | 147.038 | 144.438 |
| C | 104.883 | 147.732 | 142.429 |
| H | 105.043 | 146.657 | 142.336 |
| H | 104.268 | 148.066 | 141.588 |
| H | 105.846 | 148.248 | 142.382 |
| N | 103.212 | 151.124 | 145.546 |
| C | 103.676 | 151.635 | 144.366 |

|   |         |         |         |
|---|---------|---------|---------|
| C | 103.738 | 153.000 | 144.055 |
| H | 104.072 | 153.242 | 143.054 |
| C | 103.484 | 154.092 | 144.877 |
| C | 103.765 | 155.523 | 144.425 |
| C | 102.971 | 155.977 | 143.201 |
| H | 102.965 | 155.206 | 142.425 |
| H | 101.941 | 156.199 | 143.479 |
| H | 103.406 | 156.887 | 142.774 |
| H | 104.820 | 155.579 | 144.163 |
| C | 103.518 | 156.345 | 145.714 |
| H | 102.893 | 157.225 | 145.535 |
| C | 104.847 | 156.750 | 146.388 |
| H | 105.413 | 155.831 | 146.573 |
| H | 104.662 | 157.195 | 147.371 |
| C | 105.756 | 157.671 | 145.551 |
| H | 105.750 | 157.333 | 144.510 |
| H | 106.781 | 157.618 | 145.924 |
| C | 105.335 | 159.111 | 145.526 |
| O | 104.338 | 159.564 | 144.997 |
| O | 106.255 | 159.890 | 146.164 |
| C | 106.130 | 161.306 | 145.995 |
| H | 106.378 | 161.748 | 146.962 |
| H | 105.093 | 161.548 | 145.754 |
| C | 107.066 | 161.741 | 144.901 |
| H | 107.642 | 160.925 | 144.469 |
| C | 107.226 | 162.978 | 144.422 |
| C | 106.501 | 164.168 | 144.994 |
| H | 105.829 | 164.619 | 144.252 |
| H | 105.893 | 163.907 | 145.865 |
| H | 107.210 | 164.952 | 145.294 |
| C | 108.185 | 163.212 | 143.262 |
| H | 109.198 | 162.985 | 143.614 |
| H | 108.190 | 164.274 | 142.994 |
| C | 107.896 | 162.346 | 142.003 |

|   |         |         |         |
|---|---------|---------|---------|
| H | 107.213 | 161.542 | 142.292 |
| H | 108.823 | 161.850 | 141.691 |
| C | 107.337 | 163.051 | 140.754 |
| H | 107.230 | 162.274 | 139.986 |
| H | 108.094 | 163.746 | 140.364 |
| C | 105.987 | 163.807 | 140.858 |
| C | 106.159 | 165.271 | 141.299 |
| H | 105.205 | 165.811 | 141.223 |
| H | 106.497 | 165.353 | 142.335 |
| H | 106.894 | 165.791 | 140.670 |
| H | 105.585 | 163.846 | 139.833 |
| C | 104.936 | 163.094 | 141.724 |
| H | 104.065 | 163.760 | 141.830 |
| H | 105.328 | 162.947 | 142.736 |
| C | 104.439 | 161.749 | 141.186 |
| H | 105.270 | 161.037 | 141.106 |
| H | 104.058 | 161.893 | 140.166 |
| C | 103.347 | 161.159 | 142.085 |
| H | 102.552 | 161.912 | 142.193 |
| H | 103.761 | 160.997 | 143.088 |
| C | 102.729 | 159.839 | 141.598 |
| C | 102.120 | 159.958 | 140.190 |
| H | 101.597 | 159.035 | 139.926 |
| H | 101.401 | 160.783 | 140.120 |
| H | 102.895 | 160.123 | 139.432 |
| H | 103.545 | 159.106 | 141.518 |
| C | 101.745 | 159.255 | 142.643 |
| H | 102.341 | 158.822 | 143.451 |
| H | 101.200 | 158.423 | 142.181 |
| C | 100.737 | 160.202 | 143.314 |
| H | 101.285 | 160.926 | 143.930 |
| H | 100.153 | 159.597 | 144.021 |
| C | 99.783  | 160.955 | 142.378 |
| H | 99.403  | 160.267 | 141.610 |

|   |         |         |         |
|---|---------|---------|---------|
| H | 100.334 | 161.739 | 141.836 |
| C | 98.579  | 161.604 | 143.082 |
| C | 98.995  | 162.476 | 144.273 |
| H | 98.126  | 162.948 | 144.744 |
| H | 99.506  | 161.886 | 145.040 |
| H | 99.675  | 163.276 | 143.943 |
| H | 97.951  | 160.788 | 143.462 |
| C | 97.737  | 162.416 | 142.089 |
| H | 97.419  | 161.799 | 141.240 |
| H | 96.838  | 162.825 | 142.565 |
| H | 98.318  | 163.260 | 141.690 |

**BChI a** (chain:Q,resid:102)

|    |         |         |         |
|----|---------|---------|---------|
| MG | 102.465 | 155.806 | 155.793 |
| N  | 103.206 | 157.762 | 155.243 |
| C  | 103.530 | 158.138 | 153.970 |
| C  | 103.738 | 157.244 | 152.956 |
| C  | 104.154 | 157.533 | 151.529 |
| C  | 104.426 | 156.099 | 150.917 |
| C  | 104.037 | 155.127 | 151.924 |
| C  | 103.877 | 153.768 | 152.241 |
| C  | 104.225 | 152.555 | 151.447 |
| H  | 105.284 | 152.560 | 151.171 |
| H  | 104.039 | 151.637 | 152.010 |
| H  | 103.657 | 152.505 | 150.515 |
| O  | 104.846 | 155.976 | 149.780 |
| C  | 105.367 | 158.432 | 151.408 |
| O  | 106.434 | 158.277 | 151.957 |
| O  | 105.110 | 159.501 | 150.607 |
| C  | 106.211 | 160.410 | 150.469 |
| H  | 105.857 | 161.190 | 149.792 |
| H  | 107.089 | 159.911 | 150.056 |
| H  | 106.475 | 160.839 | 151.441 |
| H  | 103.342 | 157.982 | 150.949 |

|   |         |         |         |
|---|---------|---------|---------|
| C | 103.629 | 155.850 | 153.075 |
| N | 103.219 | 155.054 | 154.067 |
| C | 103.351 | 153.762 | 153.586 |
| C | 103.058 | 152.643 | 154.389 |
| H | 103.207 | 151.668 | 153.940 |
| C | 102.676 | 152.647 | 155.719 |
| C | 102.477 | 151.374 | 156.526 |
| C | 102.243 | 151.889 | 157.961 |
| C | 103.221 | 151.334 | 159.002 |
| H | 103.046 | 150.263 | 159.147 |
| H | 103.100 | 151.834 | 159.967 |
| H | 104.257 | 151.458 | 158.678 |
| H | 101.237 | 151.614 | 158.274 |
| C | 101.320 | 150.499 | 156.025 |
| C | 101.338 | 149.122 | 156.692 |
| H | 100.460 | 148.525 | 156.428 |
| H | 101.359 | 149.224 | 157.778 |
| H | 102.231 | 148.551 | 156.416 |
| H | 101.383 | 150.400 | 154.934 |
| H | 100.376 | 151.018 | 156.235 |
| H | 103.389 | 150.771 | 156.503 |
| N | 102.478 | 153.759 | 156.494 |
| C | 102.260 | 153.395 | 157.780 |
| C | 102.071 | 154.270 | 158.839 |
| H | 101.884 | 153.822 | 159.804 |
| C | 102.163 | 155.664 | 158.840 |
| C | 102.117 | 156.484 | 160.032 |
| C | 102.408 | 157.785 | 159.639 |
| C | 102.420 | 159.043 | 160.455 |
| H | 103.262 | 159.088 | 161.151 |
| H | 102.471 | 159.927 | 159.813 |
| H | 101.507 | 159.133 | 161.051 |
| C | 101.869 | 155.985 | 161.392 |
| O | 101.247 | 154.947 | 161.623 |

|   |         |         |         |
|---|---------|---------|---------|
| C | 102.401 | 156.828 | 162.512 |
| H | 102.455 | 156.250 | 163.427 |
| H | 103.380 | 157.249 | 162.283 |
| H | 101.702 | 157.648 | 162.676 |
| N | 102.446 | 156.452 | 157.752 |
| C | 102.613 | 157.737 | 158.214 |
| C | 102.990 | 158.833 | 157.420 |
| H | 103.114 | 159.783 | 157.929 |
| C | 103.262 | 158.836 | 156.065 |
| C | 103.751 | 160.067 | 155.311 |
| C | 105.226 | 160.347 | 155.610 |
| H | 105.371 | 160.571 | 156.673 |
| H | 105.843 | 159.481 | 155.347 |
| H | 105.569 | 161.200 | 155.013 |
| H | 103.152 | 160.937 | 155.574 |
| C | 103.546 | 159.644 | 153.841 |
| H | 104.359 | 160.003 | 153.201 |
| C | 102.193 | 160.074 | 153.239 |
| H | 101.420 | 159.976 | 154.007 |
| H | 101.941 | 159.382 | 152.431 |
| C | 102.189 | 161.483 | 152.633 |
| H | 101.180 | 161.733 | 152.285 |
| H | 102.859 | 161.492 | 151.774 |
| C | 102.655 | 162.573 | 153.563 |
| O | 103.623 | 163.280 | 153.357 |
| O | 101.871 | 162.684 | 154.658 |
| C | 102.329 | 163.603 | 155.693 |
| H | 101.882 | 164.579 | 155.497 |
| H | 103.414 | 163.701 | 155.591 |
| C | 101.959 | 163.062 | 157.032 |
| H | 102.488 | 162.155 | 157.318 |
| C | 101.104 | 163.594 | 157.917 |
| C | 100.253 | 164.813 | 157.664 |
| H | 100.354 | 165.537 | 158.482 |



|   |         |         |         |
|---|---------|---------|---------|
| H | 100.481 | 165.318 | 156.723 |
| H | 99.193  | 164.528 | 157.636 |
| C | 100.969 | 162.970 | 159.287 |
| H | 101.503 | 163.604 | 160.007 |
| H | 101.492 | 162.008 | 159.289 |
| C | 99.520  | 162.756 | 159.769 |
| H | 98.914  | 162.470 | 158.900 |
| H | 99.095  | 163.700 | 160.139 |
| C | 99.356  | 161.648 | 160.822 |
| H | 99.981  | 160.800 | 160.515 |
| H | 98.318  | 161.293 | 160.777 |
| C | 99.669  | 161.942 | 162.301 |
| C | 101.102 | 162.442 | 162.528 |
| H | 101.325 | 162.588 | 163.588 |
| H | 101.833 | 161.723 | 162.139 |
| H | 101.276 | 163.403 | 162.035 |
| H | 98.974  | 162.722 | 162.654 |
| C | 99.384  | 160.644 | 163.083 |
| H | 100.054 | 159.866 | 162.697 |
| H | 98.369  | 160.297 | 162.842 |
| C | 99.523  | 160.718 | 164.607 |
| H | 98.701  | 161.315 | 165.009 |
| H | 100.428 | 161.267 | 164.860 |
| C | 99.543  | 159.329 | 165.274 |
| H | 98.951  | 158.642 | 164.652 |
| H | 99.017  | 159.376 | 166.233 |
| C | 100.948 | 158.702 | 165.513 |
| C | 102.062 | 159.291 | 164.625 |
| H | 102.978 | 158.703 | 164.696 |
| H | 101.781 | 159.310 | 163.572 |
| H | 102.316 | 160.322 | 164.883 |
| H | 101.221 | 158.894 | 166.559 |
| C | 100.882 | 157.174 | 165.392 |
| H | 101.903 | 156.773 | 165.387 |

|   |         |         |         |
|---|---------|---------|---------|
| H | 100.446 | 156.901 | 164.423 |
| C | 100.108 | 156.461 | 166.499 |
| H | 99.116  | 156.910 | 166.631 |
| H | 100.632 | 156.598 | 167.452 |
| C | 99.960  | 154.974 | 166.159 |
| H | 100.932 | 154.601 | 165.810 |
| H | 99.299  | 154.902 | 165.288 |
| C | 99.461  | 154.044 | 167.289 |
| C | 100.601 | 153.275 | 167.948 |
| H | 100.185 | 152.522 | 168.616 |
| H | 101.227 | 152.759 | 167.211 |
| H | 101.253 | 153.927 | 168.541 |
| H | 98.811  | 153.293 | 166.856 |
| C | 98.594  | 154.745 | 168.326 |
| H | 97.761  | 155.270 | 167.845 |
| H | 98.156  | 154.025 | 169.018 |
| H | 99.191  | 155.454 | 168.906 |

| <b>BChl a</b> | <b>(chain:S,resid:101)</b> |         |         |
|---------------|----------------------------|---------|---------|
| MG            | 105.821                    | 158.147 | 163.108 |
| N             | 105.979                    | 160.075 | 162.102 |
| C             | 106.138                    | 161.300 | 162.685 |
| C             | 105.997                    | 161.499 | 164.043 |
| C             | 106.123                    | 162.791 | 164.837 |
| C             | 105.784                    | 162.372 | 166.341 |
| C             | 105.532                    | 160.934 | 166.302 |
| C             | 105.197                    | 159.811 | 167.059 |
| C             | 104.918                    | 159.711 | 168.524 |
| H             | 104.934                    | 160.694 | 168.989 |
| H             | 103.941                    | 159.252 | 168.718 |
| H             | 105.668                    | 159.093 | 169.036 |
| O             | 105.777                    | 163.168 | 167.260 |
| C             | 105.234                    | 163.930 | 164.397 |
| O             | 104.223                    | 163.842 | 163.732 |

|   |         |         |         |
|---|---------|---------|---------|
| O | 105.708 | 165.103 | 164.866 |
| C | 104.900 | 166.244 | 164.541 |
| H | 105.364 | 167.091 | 165.045 |
| H | 103.880 | 166.092 | 164.894 |
| H | 104.884 | 166.402 | 163.459 |
| H | 107.152 | 163.163 | 164.835 |
| C | 105.685 | 160.488 | 164.961 |
| N | 105.465 | 159.169 | 164.839 |
| C | 105.167 | 158.717 | 166.114 |
| C | 104.902 | 157.362 | 166.375 |
| H | 104.684 | 157.094 | 167.399 |
| C | 104.923 | 156.311 | 165.475 |
| C | 104.618 | 154.879 | 165.879 |
| C | 104.707 | 154.109 | 164.538 |
| C | 103.423 | 153.363 | 164.152 |
| H | 103.239 | 152.553 | 164.869 |
| H | 103.518 | 152.908 | 163.162 |
| H | 102.555 | 154.026 | 164.152 |
| H | 105.518 | 153.374 | 164.599 |
| C | 105.576 | 154.310 | 166.937 |
| C | 105.104 | 152.947 | 167.441 |
| H | 105.828 | 152.486 | 168.123 |
| H | 104.975 | 152.244 | 166.609 |
| H | 104.135 | 153.028 | 167.942 |
| H | 105.681 | 155.004 | 167.777 |
| H | 106.570 | 154.203 | 166.480 |
| H | 103.597 | 154.820 | 166.281 |
| N | 105.192 | 156.404 | 164.140 |
| C | 105.118 | 155.185 | 163.546 |
| C | 105.307 | 154.930 | 162.195 |
| H | 105.247 | 153.896 | 161.887 |
| C | 105.518 | 155.846 | 161.150 |
| C | 105.625 | 155.534 | 159.733 |
| C | 105.727 | 156.754 | 159.063 |

|   |         |         |         |
|---|---------|---------|---------|
| C | 105.849 | 157.017 | 157.594 |
| H | 105.017 | 156.569 | 157.038 |
| H | 105.845 | 158.084 | 157.375 |
| H | 106.770 | 156.595 | 157.185 |
| C | 105.660 | 154.172 | 159.175 |
| O | 105.583 | 153.181 | 159.896 |
| C | 105.808 | 153.965 | 157.676 |
| H | 105.911 | 152.896 | 157.486 |
| H | 104.920 | 154.333 | 157.144 |
| H | 106.675 | 154.489 | 157.269 |
| N | 105.582 | 157.208 | 161.315 |
| C | 105.719 | 157.779 | 160.074 |
| C | 105.853 | 159.159 | 159.837 |
| H | 105.893 | 159.459 | 158.797 |
| C | 105.984 | 160.191 | 160.750 |
| C | 106.119 | 161.649 | 160.320 |
| C | 104.872 | 162.177 | 159.602 |
| H | 104.621 | 161.563 | 158.733 |
| H | 104.026 | 162.149 | 160.286 |
| H | 105.024 | 163.208 | 159.270 |
| H | 106.980 | 161.738 | 159.652 |
| C | 106.396 | 162.380 | 161.657 |
| H | 105.678 | 163.191 | 161.810 |
| C | 107.820 | 162.959 | 161.737 |
| H | 108.545 | 162.186 | 161.450 |
| H | 108.061 | 163.238 | 162.770 |
| C | 107.925 | 164.174 | 160.806 |
| H | 107.192 | 164.924 | 161.111 |
| H | 107.681 | 163.845 | 159.790 |
| C | 109.303 | 164.789 | 160.766 |
| O | 110.285 | 164.275 | 160.272 |
| O | 109.294 | 166.016 | 161.331 |
| C | 110.562 | 166.733 | 161.302 |
| H | 111.362 | 166.004 | 161.456 |

|   |         |         |         |
|---|---------|---------|---------|
| H | 110.501 | 167.405 | 162.156 |
| C | 110.723 | 167.450 | 160.000 |
| H | 111.082 | 166.826 | 159.183 |
| C | 110.419 | 168.731 | 159.748 |
| C | 109.888 | 169.709 | 160.765 |
| H | 108.875 | 170.030 | 160.501 |
| H | 109.839 | 169.285 | 161.770 |
| H | 110.513 | 170.610 | 160.799 |
| C | 110.616 | 169.291 | 158.359 |
| H | 110.971 | 168.487 | 157.701 |
| H | 111.412 | 170.044 | 158.402 |
| C | 109.372 | 169.956 | 157.740 |
| H | 109.612 | 170.204 | 156.698 |
| H | 109.181 | 170.909 | 158.246 |
| C | 108.109 | 169.089 | 157.783 |
| H | 107.734 | 169.038 | 158.814 |
| H | 108.368 | 168.053 | 157.518 |
| C | 106.995 | 169.577 | 156.843 |
| C | 106.698 | 171.079 | 157.006 |
| H | 105.819 | 171.362 | 156.416 |
| H | 106.498 | 171.334 | 158.053 |
| H | 107.542 | 171.687 | 156.671 |
| H | 107.367 | 169.430 | 155.818 |
| C | 105.713 | 168.730 | 156.973 |
| H | 105.960 | 167.669 | 156.810 |
| H | 105.035 | 169.007 | 156.155 |
| C | 104.948 | 168.868 | 158.299 |
| H | 104.948 | 169.913 | 158.628 |
| H | 105.456 | 168.298 | 159.089 |
| C | 103.489 | 168.413 | 158.175 |
| H | 103.449 | 167.334 | 157.953 |
| H | 103.051 | 168.913 | 157.301 |
| C | 102.617 | 168.714 | 159.409 |
| C | 102.860 | 167.696 | 160.530 |

|   |         |         |         |
|---|---------|---------|---------|
| H | 102.335 | 167.955 | 161.455 |
| H | 102.524 | 166.692 | 160.235 |
| H | 103.927 | 167.617 | 160.775 |
| H | 102.917 | 169.700 | 159.788 |
| C | 101.137 | 168.796 | 158.992 |
| H | 100.839 | 167.826 | 158.571 |
| H | 101.049 | 169.510 | 158.165 |
| C | 100.133 | 169.155 | 160.095 |
| H | 100.115 | 168.335 | 160.825 |
| H | 99.128  | 169.157 | 159.654 |
| C | 100.354 | 170.472 | 160.863 |
| H | 101.312 | 170.426 | 161.401 |
| H | 99.582  | 170.505 | 161.644 |
| C | 100.288 | 171.800 | 160.069 |
| C | 101.603 | 172.161 | 159.362 |
| H | 101.552 | 173.164 | 158.929 |
| H | 102.442 | 172.136 | 160.069 |
| H | 101.835 | 171.458 | 158.556 |
| H | 100.111 | 172.582 | 160.818 |
| C | 99.102  | 171.839 | 159.096 |
| H | 98.164  | 171.591 | 159.609 |
| H | 98.989  | 172.830 | 158.646 |
| H | 99.228  | 171.114 | 158.284 |

| <b>BChl a</b> | <b>(chain:T,resid:102)</b> |         |         |
|---------------|----------------------------|---------|---------|
| MG            | 108.848                    | 161.371 | 171.414 |
| N             | 109.574                    | 163.298 | 170.722 |
| C             | 109.586                    | 163.746 | 169.427 |
| C             | 109.363                    | 162.912 | 168.355 |
| C             | 109.367                    | 163.234 | 166.866 |
| C             | 109.174                    | 161.822 | 166.149 |
| C             | 108.997                    | 160.859 | 167.210 |
| C             | 108.724                    | 159.517 | 167.504 |
| C             | 108.596                    | 158.360 | 166.571 |

|   |         |         |         |
|---|---------|---------|---------|
| H | 107.834 | 158.538 | 165.807 |
| H | 109.539 | 158.180 | 166.040 |
| H | 108.336 | 157.437 | 167.094 |
| O | 109.142 | 161.701 | 164.933 |
| C | 110.633 | 163.913 | 166.403 |
| O | 111.764 | 163.511 | 166.556 |
| O | 110.353 | 165.095 | 165.789 |
| C | 111.507 | 165.792 | 165.310 |
| H | 111.110 | 166.682 | 164.819 |
| H | 112.074 | 165.177 | 164.608 |
| H | 112.164 | 166.073 | 166.140 |
| H | 108.519 | 163.864 | 166.578 |
| C | 109.102 | 161.536 | 168.455 |
| N | 108.914 | 160.716 | 169.494 |
| C | 108.665 | 159.470 | 168.946 |
| C | 108.458 | 158.339 | 169.751 |
| H | 108.250 | 157.422 | 169.222 |
| C | 108.553 | 158.250 | 171.127 |
| C | 108.502 | 156.923 | 171.867 |
| C | 108.652 | 157.341 | 173.346 |
| C | 109.696 | 156.534 | 174.119 |
| H | 109.359 | 155.502 | 174.246 |
| H | 109.881 | 156.956 | 175.112 |
| H | 110.640 | 156.507 | 173.570 |
| H | 107.685 | 157.217 | 173.841 |
| C | 107.237 | 156.101 | 171.599 |
| C | 107.269 | 154.722 | 172.259 |
| H | 106.356 | 154.160 | 172.047 |
| H | 107.360 | 154.804 | 173.345 |
| H | 108.115 | 154.125 | 171.906 |
| H | 107.089 | 155.985 | 170.518 |
| H | 106.382 | 156.680 | 171.974 |
| H | 109.375 | 156.332 | 171.563 |
| N | 108.783 | 159.294 | 171.983 |

|   |         |         |         |
|---|---------|---------|---------|
| C | 108.901 | 158.838 | 173.254 |
| C | 109.179 | 159.626 | 174.366 |
| H | 109.221 | 159.116 | 175.319 |
| C | 109.461 | 160.997 | 174.410 |
| C | 109.908 | 161.723 | 175.587 |
| C | 110.188 | 163.021 | 175.175 |
| C | 110.677 | 164.185 | 175.982 |
| H | 111.710 | 164.048 | 176.318 |
| H | 110.638 | 165.111 | 175.406 |
| H | 110.063 | 164.337 | 176.877 |
| C | 110.073 | 161.149 | 176.936 |
| O | 109.417 | 160.184 | 177.328 |
| C | 111.100 | 161.793 | 177.840 |
| H | 111.300 | 161.140 | 178.686 |
| H | 112.032 | 162.003 | 177.308 |
| H | 110.711 | 162.737 | 178.225 |
| N | 109.465 | 161.841 | 173.327 |
| C | 109.899 | 163.070 | 173.763 |
| C | 110.092 | 164.192 | 172.940 |
| H | 110.432 | 165.098 | 173.431 |
| C | 109.969 | 164.281 | 171.564 |
| C | 110.352 | 165.541 | 170.802 |
| C | 111.862 | 165.796 | 170.830 |
| H | 112.235 | 165.869 | 171.856 |
| H | 112.398 | 164.980 | 170.331 |
| H | 112.087 | 166.734 | 170.311 |
| H | 109.847 | 166.398 | 171.252 |
| C | 109.846 | 165.244 | 169.370 |
| H | 110.617 | 165.483 | 168.626 |
| C | 108.560 | 165.993 | 168.992 |
| H | 107.797 | 165.810 | 169.757 |
| H | 108.178 | 165.590 | 168.049 |
| C | 108.745 | 167.514 | 168.821 |
| H | 107.872 | 167.905 | 168.287 |



|   |         |         |         |
|---|---------|---------|---------|
| H | 109.646 | 167.725 | 168.237 |
| C | 108.772 | 168.267 | 170.131 |
| O | 107.800 | 168.390 | 170.847 |
| O | 109.984 | 168.806 | 170.396 |
| C | 110.080 | 169.566 | 171.639 |
| H | 109.191 | 170.192 | 171.722 |
| H | 110.954 | 170.201 | 171.462 |
| C | 110.292 | 168.725 | 172.860 |
| H | 111.250 | 168.209 | 172.914 |
| C | 109.445 | 168.638 | 173.900 |
| C | 108.092 | 169.312 | 173.931 |
| H | 108.171 | 170.346 | 174.295 |
| H | 107.628 | 169.318 | 172.943 |
| H | 107.425 | 168.788 | 174.622 |
| C | 109.848 | 167.928 | 175.171 |
| H | 110.808 | 167.423 | 175.025 |
| H | 109.114 | 167.150 | 175.419 |
| C | 109.964 | 168.931 | 176.340 |
| H | 108.962 | 169.273 | 176.625 |
| H | 110.481 | 169.823 | 175.961 |
| C | 110.721 | 168.433 | 177.578 |
| H | 110.863 | 169.295 | 178.247 |
| H | 111.732 | 168.123 | 177.281 |
| C | 110.090 | 167.301 | 178.416 |
| C | 108.684 | 167.669 | 178.902 |
| H | 108.240 | 166.857 | 179.486 |
| H | 108.710 | 168.564 | 179.539 |
| H | 108.007 | 167.874 | 178.065 |
| H | 110.004 | 166.404 | 177.789 |
| C | 111.054 | 166.994 | 179.582 |
| H | 111.328 | 167.946 | 180.057 |
| H | 111.989 | 166.597 | 179.162 |
| C | 110.573 | 166.044 | 180.687 |
| H | 109.720 | 166.483 | 181.221 |

|   |         |         |         |
|---|---------|---------|---------|
| H | 111.378 | 165.992 | 181.426 |
| C | 110.225 | 164.608 | 180.255 |
| H | 110.728 | 164.385 | 179.306 |
| H | 109.148 | 164.522 | 180.056 |
| C | 110.661 | 163.554 | 181.302 |
| C | 112.140 | 163.192 | 181.094 |
| H | 112.269 | 162.529 | 180.234 |
| H | 112.738 | 164.085 | 180.890 |
| H | 112.563 | 162.690 | 181.971 |
| H | 110.564 | 164.018 | 182.297 |
| C | 109.743 | 162.320 | 181.300 |
| H | 109.644 | 161.932 | 180.279 |
| H | 108.739 | 162.649 | 181.602 |
| C | 110.197 | 161.177 | 182.222 |
| H | 110.682 | 161.594 | 183.115 |
| H | 110.964 | 160.580 | 181.712 |
| C | 109.021 | 160.293 | 182.657 |
| H | 108.433 | 160.015 | 181.773 |
| H | 108.352 | 160.919 | 183.263 |
| C | 109.356 | 159.004 | 183.456 |
| C | 110.710 | 159.040 | 184.168 |
| H | 110.886 | 158.095 | 184.691 |
| H | 111.523 | 159.179 | 183.451 |
| H | 110.758 | 159.847 | 184.908 |
| H | 109.397 | 158.168 | 182.745 |
| C | 108.242 | 158.717 | 184.470 |
| H | 107.266 | 158.618 | 183.983 |
| H | 108.438 | 157.799 | 185.033 |
| H | 108.172 | 159.536 | 185.198 |

|               |         |                            |         |
|---------------|---------|----------------------------|---------|
| <b>BChI a</b> |         | <b>(chain:U,resid:101)</b> |         |
| MG            | 115.092 | 162.433                    | 177.208 |
| N             | 115.030 | 164.450                    | 176.338 |
| C             | 115.568 | 165.591                    | 176.886 |

|   |         |         |         |
|---|---------|---------|---------|
| C | 116.029 | 165.645 | 178.177 |
| C | 116.676 | 166.800 | 178.920 |
| C | 116.846 | 166.267 | 180.425 |
| C | 116.380 | 164.905 | 180.410 |
| C | 116.178 | 163.753 | 181.191 |
| C | 116.421 | 163.571 | 182.656 |
| H | 116.588 | 164.538 | 183.133 |
| H | 115.570 | 163.088 | 183.149 |
| H | 117.311 | 162.962 | 182.858 |
| O | 117.321 | 166.960 | 181.317 |
| C | 115.925 | 168.107 | 178.932 |
| O | 114.730 | 168.265 | 178.779 |
| O | 116.776 | 169.139 | 179.162 |
| C | 116.153 | 170.415 | 179.337 |
| H | 116.957 | 171.146 | 179.369 |
| H | 115.607 | 170.441 | 180.280 |
| H | 115.461 | 170.628 | 178.516 |
| H | 117.686 | 167.006 | 178.550 |
| C | 115.962 | 164.578 | 179.093 |
| N | 115.537 | 163.313 | 178.999 |
| C | 115.647 | 162.782 | 180.279 |
| C | 115.224 | 161.465 | 180.573 |
| H | 115.308 | 161.154 | 181.608 |
| C | 114.654 | 160.550 | 179.714 |
| C | 114.111 | 159.207 | 180.176 |
| C | 113.547 | 158.587 | 178.875 |
| C | 112.070 | 158.181 | 178.962 |
| H | 111.960 | 157.306 | 179.610 |
| H | 111.661 | 157.922 | 177.983 |
| H | 111.462 | 158.986 | 179.385 |
| H | 114.131 | 157.701 | 178.614 |
| C | 115.170 | 158.313 | 180.834 |
| C | 114.583 | 157.006 | 181.365 |
| H | 115.373 | 156.343 | 181.729 |

|   |         |         |         |
|---|---------|---------|---------|
| H | 114.052 | 156.460 | 180.581 |
| H | 113.871 | 157.194 | 182.178 |
| H | 115.665 | 158.859 | 181.649 |
| H | 115.934 | 158.099 | 180.078 |
| H | 113.299 | 159.380 | 180.897 |
| N | 114.475 | 160.724 | 178.363 |
| C | 113.852 | 159.651 | 177.835 |
| C | 113.477 | 159.511 | 176.494 |
| H | 113.040 | 158.566 | 176.213 |
| C | 113.484 | 160.477 | 175.486 |
| C | 112.964 | 160.310 | 174.127 |
| C | 113.039 | 161.549 | 173.517 |
| C | 112.684 | 161.932 | 172.116 |
| H | 111.646 | 161.693 | 171.877 |
| H | 112.814 | 163.003 | 171.961 |
| H | 113.319 | 161.418 | 171.388 |
| C | 112.501 | 159.034 | 173.553 |
| O | 112.443 | 158.025 | 174.249 |
| C | 112.111 | 158.939 | 172.091 |
| H | 111.890 | 157.894 | 171.869 |
| H | 111.223 | 159.541 | 171.879 |
| H | 112.915 | 159.286 | 171.436 |
| N | 113.902 | 161.776 | 175.652 |
| C | 113.623 | 162.450 | 174.496 |
| C | 113.872 | 163.812 | 174.282 |
| H | 113.545 | 164.215 | 173.331 |
| C | 114.511 | 164.713 | 175.119 |
| C | 114.722 | 166.167 | 174.715 |
| C | 113.429 | 166.927 | 174.395 |
| H | 113.072 | 166.725 | 173.385 |
| H | 112.633 | 166.639 | 175.083 |
| H | 113.579 | 168.011 | 174.474 |
| H | 115.357 | 166.181 | 173.822 |
| C | 115.500 | 166.753 | 175.917 |

|   |         |         |         |
|---|---------|---------|---------|
| H | 114.944 | 167.579 | 176.377 |
| C | 116.883 | 167.272 | 175.500 |
| H | 117.453 | 166.462 | 175.029 |
| H | 117.456 | 167.606 | 176.370 |
| C | 116.728 | 168.437 | 174.507 |
| H | 116.218 | 169.275 | 174.993 |
| H | 116.130 | 168.114 | 173.650 |
| C | 118.055 | 168.885 | 173.975 |
| O | 118.717 | 168.312 | 173.134 |
| O | 118.455 | 170.042 | 174.569 |
| C | 119.716 | 170.565 | 174.093 |
| H | 120.411 | 169.729 | 173.981 |
| H | 120.047 | 171.232 | 174.890 |
| C | 119.500 | 171.268 | 172.791 |
| H | 119.320 | 170.594 | 171.957 |
| C | 119.375 | 172.586 | 172.583 |
| C | 119.583 | 173.653 | 173.625 |
| H | 118.700 | 174.301 | 173.704 |
| H | 119.782 | 173.250 | 174.620 |
| H | 120.425 | 174.303 | 173.345 |
| C | 118.881 | 173.070 | 171.240 |
| H | 118.926 | 172.239 | 170.528 |
| H | 119.527 | 173.868 | 170.844 |
| C | 117.422 | 173.594 | 171.309 |
| H | 117.018 | 173.622 | 170.287 |
| H | 117.417 | 174.634 | 171.663 |
| C | 116.513 | 172.746 | 172.211 |
| H | 116.739 | 172.977 | 173.259 |
| H | 116.768 | 171.688 | 172.096 |
| C | 115.010 | 172.916 | 171.964 |
| C | 114.576 | 174.391 | 172.027 |
| H | 113.484 | 174.484 | 171.981 |
| H | 114.913 | 174.880 | 172.946 |
| H | 114.995 | 174.956 | 171.185 |

|   |         |         |         |
|---|---------|---------|---------|
| H | 114.815 | 172.585 | 170.934 |
| C | 114.180 | 171.964 | 172.858 |
| H | 114.375 | 170.940 | 172.516 |
| H | 113.115 | 172.148 | 172.662 |
| C | 114.407 | 171.999 | 174.381 |
| H | 115.433 | 171.691 | 174.621 |
| H | 113.762 | 171.226 | 174.814 |
| C | 114.108 | 173.354 | 175.046 |
| H | 113.296 | 173.846 | 174.494 |
| H | 114.986 | 174.004 | 174.943 |
| C | 113.703 | 173.281 | 176.530 |
| C | 112.289 | 172.702 | 176.679 |
| H | 111.998 | 172.616 | 177.729 |
| H | 111.546 | 173.331 | 176.174 |
| H | 112.218 | 171.702 | 176.242 |
| H | 114.397 | 172.589 | 177.032 |
| C | 113.855 | 174.633 | 177.271 |
| H | 114.911 | 174.920 | 177.261 |
| H | 113.603 | 174.454 | 178.325 |
| C | 112.997 | 175.824 | 176.790 |
| H | 112.929 | 176.553 | 177.610 |
| H | 111.970 | 175.467 | 176.643 |
| C | 113.427 | 176.582 | 175.514 |
| H | 112.529 | 177.058 | 175.092 |
| H | 113.771 | 175.880 | 174.750 |
| C | 114.485 | 177.693 | 175.667 |
| C | 115.842 | 177.199 | 176.182 |
| H | 116.579 | 178.010 | 176.174 |
| H | 115.776 | 176.830 | 177.206 |
| H | 116.229 | 176.386 | 175.553 |
| H | 114.103 | 178.428 | 176.390 |
| C | 114.673 | 178.419 | 174.328 |
| H | 113.720 | 178.807 | 173.944 |
| H | 115.365 | 179.263 | 174.435 |

|   |         |         |         |
|---|---------|---------|---------|
| H | 115.082 | 177.737 | 173.570 |
|---|---------|---------|---------|

**BChl a** (chain:V,resid:102)

|    |         |         |         |
|----|---------|---------|---------|
| MG | 121.408 | 164.221 | 183.968 |
| N  | 122.127 | 166.104 | 183.183 |
| C  | 121.693 | 166.704 | 182.031 |
| C  | 120.929 | 166.041 | 181.098 |
| C  | 120.501 | 166.518 | 179.723 |
| C  | 119.827 | 165.236 | 179.039 |
| C  | 119.860 | 164.197 | 180.039 |
| C  | 119.514 | 162.869 | 180.321 |
| C  | 118.870 | 161.856 | 179.439 |
| H  | 117.908 | 162.209 | 179.060 |
| H  | 119.495 | 161.635 | 178.566 |
| H  | 118.694 | 160.914 | 179.964 |
| O  | 119.391 | 165.250 | 177.897 |
| C  | 121.663 | 166.967 | 178.878 |
| O  | 122.800 | 166.552 | 178.959 |
| O  | 121.290 | 167.903 | 177.979 |
| C  | 122.350 | 168.278 | 177.095 |
| H  | 121.920 | 169.002 | 176.402 |
| H  | 122.718 | 167.411 | 176.550 |
| H  | 123.183 | 168.700 | 177.663 |
| H  | 119.746 | 167.312 | 179.740 |
| C  | 120.503 | 164.706 | 181.200 |
| N  | 120.583 | 163.792 | 182.171 |
| C  | 119.968 | 162.656 | 181.672 |
| C  | 119.876 | 161.474 | 182.426 |
| H  | 119.380 | 160.635 | 181.954 |
| C  | 120.416 | 161.239 | 183.676 |
| C  | 120.371 | 159.876 | 184.341 |
| C  | 121.226 | 160.070 | 185.608 |
| C  | 122.355 | 159.050 | 185.775 |
| H  | 121.934 | 158.069 | 186.008 |

|   |         |         |         |
|---|---------|---------|---------|
| H | 123.038 | 159.328 | 186.581 |
| H | 122.934 | 158.958 | 184.852 |
| H | 120.571 | 160.002 | 186.475 |
| C | 118.965 | 159.340 | 184.644 |
| C | 118.995 | 157.851 | 185.002 |
| H | 118.003 | 157.468 | 185.256 |
| H | 119.647 | 157.668 | 185.860 |
| H | 119.382 | 157.249 | 184.173 |
| H | 118.307 | 159.511 | 183.783 |
| H | 118.544 | 159.926 | 185.471 |
| H | 120.870 | 159.164 | 183.682 |
| N | 121.141 | 162.134 | 184.418 |
| C | 121.663 | 161.517 | 185.504 |
| C | 122.503 | 162.102 | 186.438 |
| H | 122.822 | 161.474 | 187.257 |
| C | 123.058 | 163.384 | 186.421 |
| C | 124.091 | 163.847 | 187.329 |
| C | 124.492 | 165.097 | 186.870 |
| C | 125.553 | 166.007 | 187.403 |
| H | 126.519 | 165.504 | 187.486 |
| H | 125.694 | 166.868 | 186.748 |
| H | 125.292 | 166.391 | 188.393 |
| C | 124.571 | 163.104 | 188.503 |
| O | 123.914 | 162.206 | 189.030 |
| C | 125.910 | 163.467 | 189.089 |
| H | 126.134 | 162.758 | 189.884 |
| H | 126.700 | 163.449 | 188.332 |
| H | 125.881 | 164.472 | 189.513 |
| N | 122.812 | 164.346 | 185.475 |
| C | 123.661 | 165.398 | 185.730 |
| C | 123.725 | 166.577 | 184.970 |
| H | 124.430 | 167.330 | 185.302 |
| C | 123.037 | 166.885 | 183.808 |
| C | 123.310 | 168.158 | 183.019 |



|   |         |         |         |
|---|---------|---------|---------|
| C | 124.706 | 168.165 | 182.388 |
| H | 125.487 | 168.020 | 183.139 |
| H | 124.793 | 167.365 | 181.645 |
| H | 124.871 | 169.128 | 181.894 |
| H | 123.216 | 169.024 | 183.682 |
| C | 122.208 | 168.132 | 181.933 |
| H | 122.641 | 168.315 | 180.943 |
| C | 121.084 | 169.150 | 182.171 |
| H | 120.728 | 169.072 | 183.201 |
| H | 120.238 | 168.907 | 181.519 |
| C | 121.491 | 170.606 | 181.879 |
| H | 120.580 | 171.217 | 181.891 |
| H | 121.961 | 170.666 | 180.892 |
| C | 122.443 | 171.262 | 182.852 |
| O | 123.581 | 171.604 | 182.588 |
| O | 121.833 | 171.479 | 184.035 |
| C | 122.597 | 172.174 | 185.065 |
| H | 121.869 | 172.857 | 185.508 |
| H | 123.378 | 172.752 | 184.573 |
| C | 123.127 | 171.220 | 186.087 |
| H | 122.392 | 170.865 | 186.806 |
| C | 124.382 | 170.754 | 186.182 |
| C | 125.496 | 171.129 | 185.241 |
| H | 125.749 | 170.270 | 184.608 |
| H | 125.237 | 171.941 | 184.563 |
| H | 126.401 | 171.400 | 185.800 |
| C | 124.743 | 169.782 | 187.285 |
| H | 125.365 | 168.978 | 186.874 |
| H | 123.832 | 169.301 | 187.653 |
| C | 125.487 | 170.438 | 188.465 |
| H | 124.860 | 171.248 | 188.859 |
| H | 126.407 | 170.916 | 188.099 |
| C | 125.859 | 169.463 | 189.598 |
| H | 126.335 | 170.036 | 190.407 |

|   |         |         |         |
|---|---------|---------|---------|
| H | 126.622 | 168.764 | 189.232 |
| C | 124.682 | 168.656 | 190.180 |
| C | 123.511 | 169.555 | 190.596 |
| H | 122.717 | 168.963 | 191.066 |
| H | 123.839 | 170.308 | 191.325 |
| H | 123.067 | 170.084 | 189.746 |
| H | 124.324 | 167.986 | 189.390 |
| C | 125.091 | 167.764 | 191.367 |
| H | 124.220 | 167.148 | 191.626 |
| H | 125.274 | 168.398 | 192.249 |
| C | 126.305 | 166.844 | 191.162 |
| H | 127.230 | 167.403 | 191.357 |
| H | 126.372 | 166.525 | 190.117 |
| C | 126.249 | 165.607 | 192.073 |
| H | 125.545 | 164.878 | 191.653 |
| H | 125.831 | 165.903 | 193.046 |
| C | 127.617 | 164.963 | 192.335 |
| C | 128.376 | 164.514 | 191.086 |
| H | 129.324 | 164.063 | 191.392 |
| H | 127.839 | 163.750 | 190.529 |
| H | 128.596 | 165.339 | 190.401 |
| H | 128.204 | 165.764 | 192.805 |
| C | 127.551 | 163.831 | 193.369 |
| H | 126.939 | 164.172 | 194.209 |
| H | 128.563 | 163.674 | 193.767 |
| C | 126.996 | 162.460 | 192.959 |
| H | 127.670 | 161.964 | 192.249 |
| H | 126.025 | 162.561 | 192.454 |
| C | 126.835 | 161.632 | 194.237 |
| H | 126.158 | 162.190 | 194.901 |
| H | 127.804 | 161.604 | 194.761 |
| C | 126.315 | 160.192 | 194.147 |
| C | 127.335 | 159.223 | 193.545 |
| H | 126.925 | 158.211 | 193.468 |

|   |         |         |         |
|---|---------|---------|---------|
| H | 127.644 | 159.533 | 192.544 |
| H | 128.229 | 159.162 | 194.180 |
| H | 125.419 | 160.179 | 193.509 |
| C | 125.932 | 159.753 | 195.565 |
| H | 125.018 | 160.248 | 195.908 |
| H | 125.786 | 158.673 | 195.628 |
| H | 126.729 | 160.027 | 196.267 |

**BChl a** (chain:W,resid:101)

|    |         |         |         |
|----|---------|---------|---------|
| MG | 129.529 | 163.670 | 186.822 |
| N  | 129.583 | 165.742 | 186.094 |
| C  | 130.491 | 166.721 | 186.431 |
| C  | 131.364 | 166.588 | 187.475 |
| C  | 132.409 | 167.568 | 187.983 |
| C  | 133.060 | 166.834 | 189.242 |
| C  | 132.372 | 165.576 | 189.371 |
| C  | 132.281 | 164.382 | 190.108 |
| C  | 133.014 | 164.011 | 191.357 |
| H  | 133.443 | 164.902 | 191.820 |
| H  | 132.351 | 163.528 | 192.084 |
| H  | 133.849 | 163.329 | 191.155 |
| O  | 133.991 | 167.330 | 189.870 |
| C  | 131.873 | 168.910 | 188.420 |
| O  | 131.014 | 169.110 | 189.249 |
| O  | 132.514 | 169.918 | 187.752 |
| C  | 132.189 | 171.249 | 188.160 |
| H  | 132.903 | 171.581 | 188.920 |
| H  | 131.174 | 171.287 | 188.562 |
| H  | 132.284 | 171.880 | 187.277 |
| H  | 133.188 | 167.752 | 187.239 |
| C  | 131.442 | 165.459 | 188.306 |
| N  | 130.802 | 164.286 | 188.310 |
| C  | 131.294 | 163.603 | 189.416 |
| C  | 130.825 | 162.315 | 189.747 |

|   |         |         |         |
|---|---------|---------|---------|
| H | 131.327 | 161.831 | 190.568 |
| C | 129.846 | 161.576 | 189.121 |
| C | 129.387 | 160.220 | 189.624 |
| C | 128.238 | 159.849 | 188.656 |
| C | 126.892 | 159.589 | 189.346 |
| H | 126.959 | 158.703 | 189.985 |
| H | 126.095 | 159.416 | 188.619 |
| H | 126.608 | 160.442 | 189.972 |
| H | 128.510 | 158.960 | 188.082 |
| C | 130.492 | 159.158 | 189.695 |
| C | 130.018 | 157.888 | 190.401 |
| H | 130.786 | 157.110 | 190.377 |
| H | 129.128 | 157.469 | 189.923 |
| H | 129.762 | 158.098 | 191.447 |
| H | 131.364 | 159.570 | 190.221 |
| H | 130.816 | 158.930 | 188.673 |
| H | 128.993 | 160.361 | 190.634 |
| N | 129.129 | 161.964 | 188.019 |
| C | 128.208 | 161.031 | 187.705 |
| C | 127.295 | 161.117 | 186.649 |
| H | 126.652 | 160.263 | 186.494 |
| C | 127.058 | 162.202 | 185.803 |
| C | 126.046 | 162.270 | 184.750 |
| C | 126.118 | 163.543 | 184.213 |
| C | 125.378 | 164.126 | 183.053 |
| H | 124.296 | 164.026 | 183.153 |
| H | 125.600 | 165.187 | 182.949 |
| H | 125.678 | 163.639 | 182.119 |
| C | 125.168 | 161.150 | 184.348 |
| O | 125.193 | 160.086 | 184.959 |
| C | 124.238 | 161.298 | 183.164 |
| H | 123.766 | 160.334 | 182.977 |
| H | 123.458 | 162.037 | 183.373 |
| H | 124.779 | 161.618 | 182.269 |

|   |         |         |         |
|---|---------|---------|---------|
| N | 127.726 | 163.402 | 185.867 |
| C | 127.172 | 164.235 | 184.938 |
| C | 127.584 | 165.556 | 184.700 |
| H | 126.988 | 166.118 | 183.991 |
| C | 128.681 | 166.229 | 185.215 |
| C | 128.983 | 167.682 | 184.853 |
| C | 127.871 | 168.629 | 185.285 |
| H | 126.930 | 168.366 | 184.792 |
| H | 127.722 | 168.572 | 186.370 |
| H | 128.114 | 169.670 | 185.030 |
| H | 129.112 | 167.768 | 183.770 |
| C | 130.322 | 167.956 | 185.575 |
| H | 130.241 | 168.847 | 186.214 |
| C | 131.478 | 168.182 | 184.587 |
| H | 131.465 | 167.403 | 183.818 |
| H | 132.444 | 168.118 | 185.095 |
| C | 131.319 | 169.564 | 183.938 |
| H | 131.495 | 170.351 | 184.678 |
| H | 130.289 | 169.678 | 183.572 |
| C | 132.210 | 169.785 | 182.748 |
| O | 132.340 | 169.045 | 181.797 |
| O | 132.858 | 170.984 | 182.831 |
| C | 133.702 | 171.276 | 181.698 |
| H | 133.113 | 171.208 | 180.781 |
| H | 134.473 | 170.498 | 181.633 |
| C | 134.286 | 172.631 | 181.918 |
| H | 134.816 | 172.765 | 182.860 |
| C | 134.233 | 173.646 | 181.047 |
| C | 133.502 | 173.519 | 179.724 |
| H | 134.013 | 172.832 | 179.041 |
| H | 132.488 | 173.130 | 179.864 |
| H | 133.407 | 174.483 | 179.217 |
| C | 134.940 | 174.951 | 181.361 |
| H | 135.824 | 175.068 | 180.718 |

|   |         |         |         |
|---|---------|---------|---------|
| H | 135.317 | 174.898 | 182.389 |
| C | 134.067 | 176.206 | 181.197 |
| H | 133.742 | 176.285 | 180.151 |
| H | 134.682 | 177.098 | 181.377 |
| C | 132.831 | 176.205 | 182.106 |
| H | 133.108 | 176.524 | 183.122 |
| H | 132.480 | 175.172 | 182.201 |
| C | 131.681 | 177.076 | 181.578 |
| C | 132.091 | 178.552 | 181.478 |
| H | 131.266 | 179.167 | 181.097 |
| H | 132.369 | 178.939 | 182.468 |
| H | 132.949 | 178.690 | 180.810 |
| H | 131.459 | 176.720 | 180.560 |
| C | 130.386 | 176.933 | 182.397 |
| H | 129.611 | 177.531 | 181.897 |
| H | 130.535 | 177.401 | 183.383 |
| C | 129.891 | 175.483 | 182.596 |
| H | 130.325 | 174.828 | 181.828 |
| H | 128.807 | 175.443 | 182.441 |
| C | 130.208 | 174.943 | 183.996 |
| H | 129.665 | 175.568 | 184.714 |
| H | 131.272 | 175.106 | 184.217 |
| C | 129.889 | 173.454 | 184.236 |
| C | 128.488 | 173.051 | 183.758 |
| H | 128.279 | 172.006 | 184.009 |
| H | 127.708 | 173.667 | 184.222 |
| H | 128.384 | 173.147 | 182.673 |
| H | 130.614 | 172.885 | 183.634 |
| C | 130.148 | 173.041 | 185.707 |
| H | 131.075 | 173.516 | 186.042 |
| H | 130.350 | 171.964 | 185.713 |
| C | 129.024 | 173.258 | 186.744 |
| H | 129.350 | 172.792 | 187.685 |
| H | 128.161 | 172.668 | 186.418 |

|   |         |         |         |
|---|---------|---------|---------|
| C | 128.528 | 174.685 | 187.053 |
| H | 127.505 | 174.602 | 187.447 |
| H | 128.431 | 175.265 | 186.128 |
| C | 129.329 | 175.507 | 188.084 |
| C | 130.832 | 175.609 | 187.794 |
| H | 131.322 | 176.254 | 188.536 |
| H | 131.320 | 174.632 | 187.830 |
| H | 131.014 | 176.041 | 186.801 |
| H | 129.214 | 175.005 | 189.055 |
| C | 128.722 | 176.910 | 188.220 |
| H | 127.652 | 176.863 | 188.452 |
| H | 129.217 | 177.483 | 189.015 |
| H | 128.836 | 177.472 | 187.282 |

**BChl a** (chain:X,resid:102)

|    |         |         |         |
|----|---------|---------|---------|
| MG | 137.835 | 163.488 | 190.486 |
| N  | 138.551 | 165.230 | 189.440 |
| C  | 137.833 | 165.959 | 188.533 |
| C  | 136.678 | 165.509 | 187.950 |
| C  | 135.834 | 166.197 | 186.905 |
| C  | 134.738 | 165.104 | 186.500 |
| C  | 134.950 | 163.982 | 187.401 |
| C  | 134.497 | 162.719 | 187.807 |
| C  | 133.383 | 161.892 | 187.265 |
| H  | 133.532 | 161.678 | 186.201 |
| H  | 133.299 | 160.937 | 187.786 |
| H  | 132.424 | 162.409 | 187.354 |
| O  | 133.918 | 165.299 | 185.619 |
| C  | 136.604 | 166.728 | 185.718 |
| O  | 137.679 | 166.328 | 185.322 |
| O  | 135.965 | 167.775 | 185.160 |
| C  | 136.666 | 168.355 | 184.050 |
| H  | 135.976 | 169.073 | 183.612 |
| H  | 136.927 | 167.590 | 183.319 |

|   |         |         |         |
|---|---------|---------|---------|
| H | 137.582 | 168.838 | 184.404 |
| H | 135.299 | 167.053 | 187.326 |
| C | 136.076 | 164.277 | 188.217 |
| N | 136.355 | 163.306 | 189.090 |
| C | 135.398 | 162.331 | 188.872 |
| C | 135.424 | 161.117 | 189.574 |
| H | 134.654 | 160.397 | 189.325 |
| C | 136.382 | 160.695 | 190.481 |
| C | 136.387 | 159.289 | 191.051 |
| C | 137.685 | 159.243 | 191.881 |
| C | 138.621 | 158.084 | 191.526 |
| H | 138.174 | 157.133 | 191.827 |
| H | 139.588 | 158.181 | 192.029 |
| H | 138.799 | 158.036 | 190.448 |
| H | 137.415 | 159.153 | 192.932 |
| C | 135.133 | 158.949 | 191.867 |
| C | 135.039 | 157.457 | 192.179 |
| H | 134.178 | 157.234 | 192.816 |
| H | 135.934 | 157.107 | 192.697 |
| H | 134.946 | 156.862 | 191.264 |
| H | 134.242 | 159.272 | 191.313 |
| H | 135.153 | 159.537 | 192.794 |
| H | 136.455 | 158.573 | 190.229 |
| N | 137.458 | 161.417 | 190.921 |
| C | 138.262 | 160.636 | 191.691 |
| C | 139.476 | 161.022 | 192.241 |
| H | 139.988 | 160.280 | 192.835 |
| C | 140.176 | 162.224 | 192.065 |
| C | 141.531 | 162.481 | 192.529 |
| C | 141.897 | 163.725 | 192.014 |
| C | 143.175 | 164.494 | 192.178 |
| H | 144.024 | 163.986 | 191.707 |
| H | 143.099 | 165.487 | 191.729 |
| H | 143.426 | 164.642 | 193.235 |



|   |         |         |         |
|---|---------|---------|---------|
| C | 142.336 | 161.571 | 193.360 |
| O | 141.839 | 160.667 | 194.032 |
| C | 143.834 | 161.774 | 193.390 |
| H | 144.298 | 160.978 | 193.970 |
| H | 144.256 | 161.793 | 192.380 |
| H | 144.067 | 162.727 | 193.867 |
| N | 139.738 | 163.287 | 191.316 |
| C | 140.767 | 164.198 | 191.259 |
| C | 140.746 | 165.383 | 190.500 |
| H | 141.644 | 165.991 | 190.520 |
| C | 139.750 | 165.827 | 189.654 |
| C | 139.918 | 167.032 | 188.739 |
| C | 140.786 | 166.692 | 187.523 |
| H | 141.807 | 166.436 | 187.827 |
| H | 140.355 | 165.849 | 186.974 |
| H | 140.808 | 167.545 | 186.838 |
| H | 140.358 | 167.864 | 189.293 |
| C | 138.463 | 167.310 | 188.302 |
| H | 138.416 | 167.616 | 187.257 |
| C | 137.743 | 168.335 | 189.196 |
| H | 138.048 | 168.137 | 190.225 |
| H | 136.662 | 168.171 | 189.146 |
| C | 138.005 | 169.811 | 188.817 |
| H | 137.803 | 170.476 | 189.662 |
| H | 137.344 | 170.062 | 187.991 |
| C | 139.393 | 170.019 | 188.279 |
| O | 139.662 | 169.934 | 187.097 |
| O | 140.323 | 170.231 | 189.236 |
| C | 141.690 | 170.172 | 188.769 |
| H | 141.907 | 171.078 | 188.195 |
| H | 141.774 | 169.330 | 188.076 |
| C | 142.581 | 169.982 | 189.955 |
| H | 142.117 | 169.445 | 190.778 |
| C | 143.872 | 170.328 | 190.026 |

|   |         |         |         |
|---|---------|---------|---------|
| C | 144.606 | 171.022 | 188.903 |
| H | 145.292 | 170.324 | 188.403 |
| H | 143.941 | 171.422 | 188.133 |
| H | 145.223 | 171.845 | 189.291 |
| C | 144.737 | 170.015 | 191.228 |
| H | 145.055 | 170.969 | 191.682 |
| H | 145.674 | 169.558 | 190.872 |
| C | 144.134 | 169.125 | 192.317 |
| H | 143.803 | 168.174 | 191.881 |
| H | 143.236 | 169.608 | 192.719 |
| C | 145.135 | 168.857 | 193.445 |
| H | 145.499 | 169.821 | 193.836 |
| H | 146.015 | 168.347 | 193.028 |
| C | 144.600 | 168.034 | 194.630 |
| C | 143.431 | 168.732 | 195.337 |
| H | 143.064 | 168.120 | 196.168 |
| H | 143.746 | 169.701 | 195.748 |
| H | 142.585 | 168.911 | 194.664 |
| H | 144.226 | 167.077 | 194.237 |
| C | 145.752 | 167.741 | 195.621 |
| H | 145.348 | 167.670 | 196.640 |
| H | 146.433 | 168.604 | 195.627 |
| C | 146.535 | 166.453 | 195.324 |
| H | 147.499 | 166.481 | 195.850 |
| H | 146.778 | 166.397 | 194.256 |
| C | 145.767 | 165.204 | 195.774 |
| H | 144.822 | 165.123 | 195.216 |
| H | 145.481 | 165.343 | 196.827 |
| C | 146.530 | 163.876 | 195.646 |
| C | 146.819 | 163.536 | 194.176 |
| H | 147.275 | 162.548 | 194.063 |
| H | 145.902 | 163.535 | 193.581 |
| H | 147.493 | 164.269 | 193.720 |
| H | 147.491 | 164.004 | 196.165 |

|   |         |         |         |
|---|---------|---------|---------|
| C | 145.762 | 162.772 | 196.397 |
| H | 144.781 | 162.620 | 195.930 |
| H | 145.551 | 163.142 | 197.412 |
| C | 146.471 | 161.419 | 196.521 |
| H | 147.498 | 161.569 | 196.888 |
| H | 146.566 | 160.955 | 195.531 |
| C | 145.722 | 160.478 | 197.474 |
| H | 144.688 | 160.366 | 197.118 |
| H | 145.654 | 160.962 | 198.457 |
| C | 146.348 | 159.081 | 197.631 |
| C | 145.887 | 158.369 | 198.904 |
| H | 146.421 | 157.424 | 199.035 |
| H | 146.053 | 158.973 | 199.804 |
| H | 144.819 | 158.132 | 198.836 |
| H | 147.440 | 159.205 | 197.681 |
| C | 146.013 | 158.224 | 196.411 |
| H | 146.274 | 158.768 | 195.501 |
| H | 146.535 | 157.260 | 196.420 |
| H | 144.937 | 158.012 | 196.378 |

**BChl a** (chain:Y,resid:101)

|    |         |         |         |
|----|---------|---------|---------|
| MG | 146.373 | 161.708 | 189.761 |
| N  | 146.463 | 163.817 | 189.164 |
| C  | 147.575 | 164.628 | 189.185 |
| C  | 148.738 | 164.278 | 189.819 |
| C  | 150.027 | 165.081 | 189.986 |
| C  | 150.966 | 164.148 | 190.871 |
| C  | 150.193 | 162.972 | 191.171 |
| C  | 150.189 | 161.740 | 191.849 |
| C  | 151.267 | 161.166 | 192.713 |
| H  | 151.821 | 161.967 | 193.209 |
| H  | 150.860 | 160.509 | 193.487 |
| H  | 152.003 | 160.596 | 192.133 |
| O  | 152.117 | 164.469 | 191.157 |

|   |         |         |         |
|---|---------|---------|---------|
| C | 149.795 | 166.381 | 190.718 |
| O | 149.472 | 166.501 | 191.878 |
| O | 149.972 | 167.465 | 189.896 |
| C | 149.742 | 168.728 | 190.523 |
| H | 149.657 | 169.456 | 189.713 |
| H | 150.582 | 168.991 | 191.175 |
| H | 148.822 | 168.705 | 191.112 |
| H | 150.516 | 165.297 | 189.032 |
| C | 148.936 | 163.076 | 190.522 |
| N | 148.166 | 162.003 | 190.725 |
| C | 148.910 | 161.164 | 191.550 |
| C | 148.379 | 159.942 | 192.015 |
| H | 149.025 | 159.351 | 192.650 |
| C | 147.126 | 159.419 | 191.779 |
| C | 146.639 | 158.131 | 192.417 |
| C | 145.193 | 157.993 | 191.885 |
| C | 144.129 | 157.850 | 192.978 |
| H | 144.261 | 156.909 | 193.521 |
| H | 143.120 | 157.859 | 192.564 |
| H | 144.200 | 158.670 | 193.697 |
| H | 145.130 | 157.125 | 191.223 |
| C | 147.518 | 156.915 | 192.098 |
| C | 147.066 | 155.671 | 192.857 |
| H | 147.675 | 154.804 | 192.587 |
| H | 146.030 | 155.410 | 192.629 |
| H | 147.137 | 155.837 | 193.939 |
| H | 148.563 | 157.142 | 192.347 |
| H | 147.481 | 156.736 | 191.016 |
| H | 146.623 | 158.264 | 193.507 |
| N | 146.150 | 159.983 | 190.993 |
| C | 145.029 | 159.237 | 191.032 |
| C | 143.815 | 159.558 | 190.415 |
| H | 143.014 | 158.843 | 190.527 |
| C | 143.463 | 160.733 | 189.753 |

|   |         |         |         |
|---|---------|---------|---------|
| C | 142.131 | 161.071 | 189.245 |
| C | 142.214 | 162.358 | 188.748 |
| C | 141.163 | 163.163 | 188.054 |
| H | 140.242 | 163.238 | 188.633 |
| H | 141.521 | 164.173 | 187.866 |
| H | 140.898 | 162.723 | 187.086 |
| C | 140.963 | 160.168 | 189.234 |
| O | 141.038 | 159.050 | 189.734 |
| C | 139.658 | 160.593 | 188.594 |
| H | 138.983 | 159.736 | 188.601 |
| H | 139.194 | 161.404 | 189.164 |
| H | 139.796 | 160.938 | 187.566 |
| N | 144.315 | 161.789 | 189.530 |
| C | 143.590 | 162.786 | 188.939 |
| C | 144.101 | 164.037 | 188.572 |
| H | 143.393 | 164.742 | 188.154 |
| C | 145.403 | 164.502 | 188.683 |
| C | 145.776 | 165.944 | 188.342 |
| C | 145.141 | 166.932 | 189.330 |
| H | 144.049 | 166.868 | 189.318 |
| H | 145.476 | 166.724 | 190.353 |
| H | 145.422 | 167.962 | 189.074 |
| H | 145.440 | 166.194 | 187.330 |
| C | 147.320 | 165.915 | 188.430 |
| H | 147.704 | 166.782 | 188.980 |
| C | 148.007 | 165.863 | 187.051 |
| H | 147.442 | 165.205 | 186.384 |
| H | 149.012 | 165.439 | 187.146 |
| C | 148.103 | 167.267 | 186.426 |
| H | 148.764 | 167.874 | 187.050 |
| H | 147.110 | 167.733 | 186.435 |
| C | 148.532 | 167.166 | 184.975 |
| O | 147.907 | 166.521 | 184.172 |
| O | 149.692 | 167.749 | 184.540 |

|   |         |         |         |
|---|---------|---------|---------|
| C | 150.307 | 168.867 | 185.178 |
| H | 151.331 | 168.570 | 185.434 |
| H | 149.798 | 169.129 | 186.107 |
| C | 150.304 | 170.007 | 184.201 |
| H | 150.423 | 169.688 | 183.167 |
| C | 150.159 | 171.313 | 184.459 |
| C | 149.966 | 171.882 | 185.843 |
| H | 149.092 | 172.547 | 185.872 |
| H | 149.821 | 171.107 | 186.600 |
| H | 150.833 | 172.479 | 186.157 |
| C | 150.178 | 172.298 | 183.310 |
| H | 149.187 | 172.773 | 183.227 |
| H | 150.315 | 171.735 | 182.383 |
| C | 151.253 | 173.408 | 183.430 |
| H | 151.667 | 173.633 | 182.439 |
| H | 152.094 | 173.033 | 184.025 |
| C | 150.708 | 174.705 | 184.050 |
| H | 151.538 | 175.336 | 184.399 |
| H | 150.127 | 174.447 | 184.943 |
| C | 149.830 | 175.525 | 183.078 |
| C | 150.689 | 176.421 | 182.176 |
| H | 150.084 | 176.904 | 181.400 |
| H | 151.183 | 177.210 | 182.757 |
| H | 151.475 | 175.845 | 181.675 |
| H | 149.306 | 174.816 | 182.423 |
| C | 148.733 | 176.321 | 183.813 |
| H | 148.004 | 175.609 | 184.226 |
| H | 148.183 | 176.938 | 183.088 |
| C | 149.235 | 177.204 | 184.959 |
| H | 150.007 | 177.896 | 184.594 |
| H | 149.724 | 176.570 | 185.707 |
| C | 148.134 | 178.028 | 185.639 |
| H | 147.244 | 177.403 | 185.796 |
| H | 147.822 | 178.840 | 184.966 |

|   |         |         |         |
|---|---------|---------|---------|
| C | 148.599 | 178.607 | 186.990 |
| C | 148.525 | 177.562 | 188.111 |
| H | 148.913 | 177.962 | 189.056 |
| H | 147.494 | 177.235 | 188.283 |
| H | 149.112 | 176.672 | 187.866 |
| H | 149.661 | 178.874 | 186.864 |
| C | 147.874 | 179.909 | 187.369 |
| H | 148.084 | 180.668 | 186.601 |
| H | 148.297 | 180.292 | 188.310 |
| C | 146.364 | 179.835 | 187.582 |
| H | 146.139 | 179.110 | 188.371 |
| H | 145.860 | 179.476 | 186.675 |
| C | 145.805 | 181.211 | 187.962 |
| H | 145.906 | 181.881 | 187.094 |
| H | 146.430 | 181.649 | 188.760 |
| C | 144.346 | 181.195 | 188.431 |
| C | 144.188 | 180.529 | 189.804 |
| H | 143.144 | 180.537 | 190.132 |
| H | 144.522 | 179.487 | 189.800 |
| H | 144.777 | 181.066 | 190.560 |
| H | 143.784 | 180.607 | 187.695 |
| C | 143.756 | 182.606 | 188.457 |
| H | 143.846 | 183.095 | 187.481 |
| H | 142.697 | 182.596 | 188.724 |
| H | 144.275 | 183.230 | 189.202 |

| <b>BChl a</b> | <b>(chain:Z,resid:102)</b> |         |         |
|---------------|----------------------------|---------|---------|
| MG            | 155.534                    | 160.140 | 190.327 |
| N             | 156.119                    | 161.923 | 189.293 |
| C             | 155.264                    | 162.876 | 188.807 |
| C             | 153.912                    | 162.675 | 188.679 |
| C             | 152.871                    | 163.604 | 188.088 |
| C             | 151.539                    | 162.718 | 188.035 |
| C             | 151.876                    | 161.457 | 188.651 |

|   |         |         |         |
|---|---------|---------|---------|
| C | 151.387 | 160.209 | 189.056 |
| C | 150.032 | 159.628 | 188.847 |
| H | 149.788 | 159.580 | 187.780 |
| H | 149.959 | 158.617 | 189.251 |
| H | 149.256 | 160.238 | 189.316 |
| O | 150.487 | 163.141 | 187.584 |
| C | 153.252 | 164.113 | 186.720 |
| O | 153.932 | 163.515 | 185.915 |
| O | 152.777 | 165.359 | 186.495 |
| C | 153.203 | 165.905 | 185.236 |
| H | 152.643 | 166.829 | 185.096 |
| H | 152.992 | 165.221 | 184.415 |
| H | 154.279 | 166.089 | 185.285 |
| H | 152.658 | 164.469 | 188.725 |
| C | 153.248 | 161.489 | 189.014 |
| N | 153.644 | 160.365 | 189.615 |
| C | 152.519 | 159.561 | 189.676 |
| C | 152.575 | 158.280 | 190.247 |
| H | 151.652 | 157.714 | 190.256 |
| C | 153.694 | 157.640 | 190.749 |
| C | 153.649 | 156.227 | 191.294 |
| C | 155.127 | 155.905 | 191.576 |
| C | 155.636 | 154.637 | 190.892 |
| H | 155.159 | 153.764 | 191.344 |
| H | 156.718 | 154.530 | 191.000 |
| H | 155.394 | 154.649 | 189.825 |
| H | 155.246 | 155.779 | 192.648 |
| C | 152.758 | 156.065 | 192.532 |
| C | 152.467 | 154.590 | 192.807 |
| H | 151.950 | 154.433 | 193.757 |
| H | 153.395 | 154.017 | 192.839 |
| H | 151.856 | 154.147 | 192.013 |
| H | 151.824 | 156.624 | 192.389 |
| H | 153.262 | 156.529 | 193.389 |



|   |         |         |         |
|---|---------|---------|---------|
| H | 153.276 | 155.547 | 190.527 |
| N | 154.966 | 158.143 | 190.789 |
| C | 155.833 | 157.195 | 191.212 |
| C | 157.206 | 157.353 | 191.347 |
| H | 157.749 | 156.492 | 191.707 |
| C | 157.999 | 158.449 | 190.993 |
| C | 159.451 | 158.469 | 191.005 |
| C | 159.840 | 159.667 | 190.407 |
| C | 161.216 | 160.192 | 190.124 |
| H | 161.771 | 159.529 | 189.453 |
| H | 161.171 | 161.171 | 189.641 |
| H | 161.810 | 160.309 | 191.039 |
| C | 160.301 | 157.411 | 191.566 |
| O | 159.890 | 156.588 | 192.384 |
| C | 161.745 | 157.359 | 191.136 |
| H | 162.196 | 156.450 | 191.531 |
| H | 161.854 | 157.388 | 190.049 |
| H | 162.276 | 158.219 | 191.548 |
| N | 157.531 | 159.619 | 190.453 |
| C | 158.623 | 160.368 | 190.086 |
| C | 158.544 | 161.627 | 189.464 |
| H | 159.482 | 162.111 | 189.210 |
| C | 157.403 | 162.320 | 189.108 |
| C | 157.445 | 163.618 | 188.317 |
| C | 157.727 | 163.309 | 186.846 |
| H | 158.720 | 162.861 | 186.737 |
| H | 156.982 | 162.607 | 186.458 |
| H | 157.659 | 164.223 | 186.248 |
| H | 158.209 | 164.288 | 188.717 |
| C | 156.012 | 164.155 | 188.500 |
| H | 155.645 | 164.648 | 187.597 |
| C | 155.850 | 165.082 | 189.719 |
| H | 156.434 | 164.663 | 190.547 |
| H | 154.797 | 165.049 | 190.003 |

|   |         |         |         |
|---|---------|---------|---------|
| C | 156.223 | 166.573 | 189.510 |
| H | 156.558 | 167.017 | 190.451 |
| H | 155.340 | 167.110 | 189.161 |
| C | 157.278 | 166.729 | 188.453 |
| O | 157.036 | 166.857 | 187.270 |
| O | 158.530 | 166.625 | 188.950 |
| C | 159.591 | 166.515 | 187.979 |
| H | 159.809 | 167.520 | 187.592 |
| H | 159.221 | 165.932 | 187.134 |
| C | 160.807 | 165.851 | 188.554 |
| H | 161.410 | 165.365 | 187.787 |
| C | 161.234 | 165.774 | 189.821 |
| C | 160.537 | 166.394 | 191.008 |
| H | 161.275 | 166.864 | 191.673 |
| H | 159.789 | 167.128 | 190.720 |
| H | 160.029 | 165.628 | 191.602 |
| C | 162.513 | 165.032 | 190.151 |
| H | 163.231 | 165.756 | 190.570 |
| H | 162.970 | 164.634 | 189.236 |
| C | 162.332 | 163.906 | 191.184 |
| H | 161.718 | 163.108 | 190.751 |
| H | 161.763 | 164.302 | 192.029 |
| C | 163.665 | 163.339 | 191.691 |
| H | 164.375 | 164.171 | 191.830 |
| H | 164.106 | 162.691 | 190.923 |
| C | 163.582 | 162.576 | 193.028 |
| C | 163.155 | 163.494 | 194.182 |
| H | 163.036 | 162.920 | 195.107 |
| H | 163.920 | 164.262 | 194.361 |
| H | 162.208 | 164.008 | 193.990 |
| H | 162.832 | 161.779 | 192.928 |
| C | 164.943 | 161.936 | 193.369 |
| H | 164.984 | 161.746 | 194.451 |
| H | 165.730 | 162.677 | 193.162 |

|   |         |         |         |
|---|---------|---------|---------|
| C | 165.271 | 160.620 | 192.653 |
| H | 166.335 | 160.403 | 192.818 |
| H | 165.153 | 160.734 | 191.568 |
| C | 164.449 | 159.427 | 193.167 |
| H | 163.429 | 159.462 | 192.766 |
| H | 164.349 | 159.519 | 194.259 |
| C | 165.099 | 158.069 | 192.860 |
| C | 165.102 | 157.723 | 191.363 |
| H | 165.805 | 156.910 | 191.154 |
| H | 164.127 | 157.388 | 191.017 |
| H | 165.382 | 158.584 | 190.747 |
| H | 166.149 | 158.166 | 193.178 |
| C | 164.515 | 156.930 | 193.714 |
| H | 163.453 | 156.777 | 193.484 |
| H | 164.564 | 157.228 | 194.771 |
| C | 165.309 | 155.636 | 193.522 |
| H | 166.372 | 155.908 | 193.472 |
| H | 165.072 | 155.205 | 192.543 |
| C | 165.161 | 154.564 | 194.604 |
| H | 165.273 | 155.028 | 195.593 |
| H | 166.007 | 153.874 | 194.491 |
| C | 163.881 | 153.709 | 194.653 |
| C | 163.297 | 153.404 | 193.281 |
| H | 162.437 | 152.734 | 193.357 |
| H | 162.960 | 154.326 | 192.798 |
| H | 164.038 | 152.905 | 192.642 |
| H | 163.111 | 154.250 | 195.216 |
| C | 164.219 | 152.405 | 195.371 |
| H | 164.603 | 152.569 | 196.383 |
| H | 163.358 | 151.743 | 195.425 |
| H | 164.993 | 151.879 | 194.802 |

|               |         |                            |         |
|---------------|---------|----------------------------|---------|
| <b>BChl a</b> |         | <b>(chain:1,resid:101)</b> |         |
| MG            | 162.818 | 157.321                    | 187.164 |

|   |         |         |         |
|---|---------|---------|---------|
| N | 163.050 | 159.395 | 186.534 |
| C | 164.211 | 160.012 | 186.165 |
| C | 165.444 | 159.435 | 186.362 |
| C | 166.810 | 160.044 | 186.098 |
| C | 167.841 | 158.968 | 186.655 |
| C | 167.032 | 157.834 | 187.099 |
| C | 167.055 | 156.561 | 187.677 |
| C | 168.241 | 155.734 | 188.051 |
| H | 168.902 | 155.584 | 187.188 |
| H | 168.843 | 156.205 | 188.835 |
| H | 167.950 | 154.739 | 188.397 |
| O | 169.041 | 159.169 | 186.676 |
| C | 167.033 | 161.371 | 186.784 |
| O | 166.720 | 161.632 | 187.926 |
| O | 167.652 | 162.238 | 185.947 |
| C | 167.914 | 163.551 | 186.463 |
| H | 168.971 | 163.770 | 186.292 |
| H | 167.665 | 163.582 | 187.522 |
| H | 167.296 | 164.261 | 185.908 |
| H | 166.979 | 160.181 | 185.026 |
| C | 165.664 | 158.170 | 186.922 |
| N | 164.843 | 157.211 | 187.375 |
| C | 165.663 | 156.196 | 187.839 |
| C | 165.126 | 155.044 | 188.447 |
| H | 165.826 | 154.305 | 188.809 |
| C | 163.791 | 154.761 | 188.679 |
| C | 163.319 | 153.660 | 189.620 |
| C | 161.796 | 153.619 | 189.371 |
| C | 160.978 | 153.468 | 190.656 |
| H | 161.132 | 152.470 | 191.084 |
| H | 159.909 | 153.571 | 190.458 |
| H | 161.252 | 154.215 | 191.403 |
| H | 161.547 | 152.779 | 188.706 |
| C | 164.013 | 152.295 | 189.558 |

|   |         |         |         |
|---|---------|---------|---------|
| C | 163.998 | 151.648 | 188.179 |
| H | 164.413 | 150.635 | 188.216 |
| H | 164.554 | 152.244 | 187.452 |
| H | 162.976 | 151.545 | 187.796 |
| H | 163.500 | 151.636 | 190.273 |
| H | 165.045 | 152.378 | 189.909 |
| H | 163.468 | 154.056 | 190.632 |
| N | 162.723 | 155.494 | 188.241 |
| C | 161.551 | 154.904 | 188.598 |
| C | 160.279 | 155.406 | 188.354 |
| H | 159.447 | 154.777 | 188.636 |
| C | 159.920 | 156.663 | 187.846 |
| C | 158.568 | 157.175 | 187.657 |
| C | 158.702 | 158.489 | 187.211 |
| C | 157.648 | 159.447 | 186.750 |
| H | 156.904 | 159.657 | 187.527 |
| H | 158.079 | 160.395 | 186.438 |
| H | 157.105 | 159.039 | 185.888 |
| C | 157.330 | 156.410 | 187.895 |
| O | 157.355 | 155.256 | 188.314 |
| C | 155.976 | 157.045 | 187.625 |
| H | 155.204 | 156.307 | 187.843 |
| H | 155.818 | 157.922 | 188.265 |
| H | 155.882 | 157.374 | 186.585 |
| N | 160.825 | 157.643 | 187.514 |
| C | 160.115 | 158.760 | 187.152 |
| C | 160.692 | 159.982 | 186.762 |
| H | 160.003 | 160.806 | 186.632 |
| C | 162.011 | 160.259 | 186.456 |
| C | 162.482 | 161.652 | 186.050 |
| C | 162.304 | 162.643 | 187.201 |
| H | 161.248 | 162.741 | 187.475 |
| H | 162.849 | 162.277 | 188.077 |
| H | 162.690 | 163.630 | 186.927 |

|   |         |         |         |
|---|---------|---------|---------|
| H | 161.914 | 161.996 | 185.179 |
| C | 163.968 | 161.427 | 185.678 |
| H | 164.604 | 162.105 | 186.257 |
| C | 164.254 | 161.660 | 184.178 |
| H | 163.463 | 161.196 | 183.577 |
| H | 165.191 | 161.171 | 183.883 |
| C | 164.325 | 163.168 | 183.921 |
| H | 165.192 | 163.592 | 184.434 |
| H | 163.437 | 163.642 | 184.367 |
| C | 164.332 | 163.608 | 182.473 |
| O | 163.839 | 163.015 | 181.538 |
| O | 164.910 | 164.833 | 182.376 |
| C | 164.802 | 165.512 | 181.094 |
| H | 163.931 | 165.101 | 180.572 |
| H | 165.689 | 165.264 | 180.508 |
| C | 164.652 | 166.974 | 181.382 |
| H | 163.808 | 167.199 | 182.034 |
| C | 165.402 | 167.989 | 180.933 |
| C | 166.596 | 167.822 | 180.023 |
| H | 167.534 | 167.966 | 180.573 |
| H | 166.626 | 166.833 | 179.562 |
| H | 166.574 | 168.564 | 179.216 |
| C | 165.062 | 169.419 | 181.305 |
| H | 164.151 | 169.422 | 181.918 |
| H | 164.819 | 169.963 | 180.380 |
| C | 166.178 | 170.185 | 182.045 |
| H | 165.866 | 171.233 | 182.143 |
| H | 167.083 | 170.186 | 181.428 |
| C | 166.481 | 169.613 | 183.434 |
| H | 166.830 | 168.574 | 183.332 |
| H | 165.537 | 169.547 | 183.996 |
| C | 167.506 | 170.411 | 184.262 |
| C | 168.897 | 170.392 | 183.623 |
| H | 169.622 | 170.918 | 184.253 |

|   |         |         |         |
|---|---------|---------|---------|
| H | 169.245 | 169.357 | 183.511 |
| H | 168.898 | 170.855 | 182.633 |
| H | 167.164 | 171.456 | 184.289 |
| C | 167.542 | 169.888 | 185.719 |
| H | 168.565 | 169.929 | 186.115 |
| H | 167.257 | 168.827 | 185.728 |
| C | 166.614 | 170.672 | 186.658 |
| H | 166.392 | 170.070 | 187.551 |
| H | 165.648 | 170.824 | 186.156 |
| C | 167.209 | 172.015 | 187.107 |
| H | 167.633 | 172.538 | 186.240 |
| H | 168.051 | 171.797 | 187.779 |
| C | 166.191 | 172.925 | 187.820 |
| C | 165.236 | 173.585 | 186.815 |
| H | 164.467 | 174.173 | 187.327 |
| H | 165.770 | 174.235 | 186.115 |
| H | 164.716 | 172.826 | 186.217 |
| H | 165.579 | 172.267 | 188.458 |
| C | 166.822 | 173.954 | 188.785 |
| H | 167.377 | 173.400 | 189.557 |
| H | 165.988 | 174.437 | 189.312 |
| C | 167.735 | 175.048 | 188.195 |
| H | 167.681 | 175.905 | 188.874 |
| H | 167.334 | 175.382 | 187.230 |
| C | 169.204 | 174.634 | 188.029 |
| H | 169.268 | 173.795 | 187.324 |
| H | 169.570 | 174.238 | 188.991 |
| C | 170.153 | 175.747 | 187.548 |
| C | 170.209 | 176.926 | 188.530 |
| H | 170.950 | 177.669 | 188.224 |
| H | 169.237 | 177.404 | 188.668 |
| H | 170.521 | 176.543 | 189.516 |
| H | 169.781 | 176.084 | 186.571 |
| C | 171.558 | 175.174 | 187.330 |

|   |         |         |         |
|---|---------|---------|---------|
| H | 171.521 | 174.316 | 186.648 |
| H | 172.251 | 175.903 | 186.901 |
| H | 171.987 | 174.809 | 188.274 |

**BChl a** (chain:2,resid:102)

|    |         |         |         |
|----|---------|---------|---------|
| MG | 171.290 | 154.852 | 184.540 |
| N  | 171.662 | 156.528 | 183.198 |
| C  | 170.791 | 157.545 | 182.911 |
| C  | 169.476 | 157.525 | 183.284 |
| C  | 168.420 | 158.581 | 183.074 |
| C  | 167.065 | 157.866 | 183.491 |
| C  | 167.437 | 156.569 | 184.029 |
| C  | 166.994 | 155.377 | 184.623 |
| C  | 165.611 | 154.897 | 184.887 |
| H  | 165.036 | 154.837 | 183.957 |
| H  | 165.609 | 153.903 | 185.339 |
| H  | 165.079 | 155.573 | 185.557 |
| O  | 165.991 | 158.432 | 183.372 |
| C  | 168.318 | 159.182 | 181.692 |
| O  | 168.283 | 158.585 | 180.640 |
| O  | 168.292 | 160.536 | 181.798 |
| C  | 168.132 | 161.275 | 180.582 |
| H  | 168.707 | 162.195 | 180.715 |
| H  | 167.080 | 161.516 | 180.438 |
| H  | 168.495 | 160.697 | 179.730 |
| H  | 168.589 | 159.417 | 183.755 |
| C  | 168.850 | 156.450 | 183.923 |
| N  | 169.314 | 155.301 | 184.419 |
| C  | 168.199 | 154.622 | 184.874 |
| C  | 168.292 | 153.341 | 185.434 |
| H  | 167.366 | 152.923 | 185.804 |
| C  | 169.414 | 152.534 | 185.518 |
| C  | 169.346 | 151.079 | 185.950 |
| C  | 170.820 | 150.617 | 185.875 |



|   |         |         |         |
|---|---------|---------|---------|
| C | 171.035 | 149.350 | 185.037 |
| H | 170.537 | 148.497 | 185.505 |
| H | 172.097 | 149.111 | 184.931 |
| H | 170.615 | 149.461 | 184.035 |
| H | 171.183 | 150.428 | 186.887 |
| C | 168.696 | 150.876 | 187.326 |
| C | 168.389 | 149.412 | 187.630 |
| H | 168.039 | 149.274 | 188.657 |
| H | 169.274 | 148.789 | 187.496 |
| H | 167.620 | 149.021 | 186.960 |
| H | 167.767 | 151.459 | 187.380 |
| H | 169.377 | 151.293 | 188.080 |
| H | 168.761 | 150.526 | 185.204 |
| N | 170.685 | 152.895 | 185.177 |
| C | 171.536 | 151.854 | 185.351 |
| C | 172.899 | 151.889 | 185.077 |
| H | 173.458 | 150.992 | 185.309 |
| C | 173.641 | 152.911 | 184.465 |
| C | 175.028 | 152.804 | 184.053 |
| C | 175.330 | 153.961 | 183.342 |
| C | 176.641 | 154.403 | 182.764 |
| H | 176.979 | 153.761 | 181.945 |
| H | 176.579 | 155.425 | 182.380 |
| H | 177.425 | 154.392 | 183.529 |
| C | 175.883 | 151.627 | 184.267 |
| O | 175.719 | 150.844 | 185.204 |
| C | 176.976 | 151.373 | 183.262 |
| H | 177.321 | 150.349 | 183.390 |
| H | 176.637 | 151.532 | 182.235 |
| H | 177.810 | 152.053 | 183.439 |
| N | 173.132 | 154.107 | 184.022 |
| C | 174.123 | 154.744 | 183.315 |
| C | 173.940 | 155.923 | 182.563 |
| H | 174.760 | 156.216 | 181.916 |

|   |         |         |         |
|---|---------|---------|---------|
| C | 172.790 | 156.683 | 182.459 |
| C | 172.594 | 157.802 | 181.450 |
| C | 172.111 | 157.321 | 180.085 |
| H | 172.873 | 156.720 | 179.603 |
| H | 171.189 | 156.741 | 180.165 |
| H | 171.916 | 158.189 | 179.448 |
| H | 173.523 | 158.336 | 181.287 |
| C | 171.458 | 158.622 | 182.088 |
| H | 170.792 | 158.999 | 181.307 |
| C | 171.895 | 159.809 | 182.953 |
| H | 172.458 | 159.460 | 183.821 |
| H | 171.002 | 160.324 | 183.325 |
| C | 172.742 | 160.794 | 182.144 |
| H | 172.901 | 161.709 | 182.729 |
| H | 172.233 | 161.084 | 181.219 |
| C | 174.116 | 160.281 | 181.753 |
| O | 174.658 | 160.486 | 180.686 |
| O | 174.715 | 159.660 | 182.795 |
| C | 176.062 | 159.171 | 182.609 |
| H | 176.323 | 159.271 | 181.551 |
| H | 176.024 | 158.108 | 182.864 |
| C | 176.970 | 159.965 | 183.510 |
| H | 176.490 | 160.824 | 183.970 |
| C | 178.251 | 159.718 | 183.803 |
| C | 179.009 | 160.636 | 184.729 |
| H | 179.934 | 160.995 | 184.257 |
| H | 178.406 | 161.506 | 185.007 |
| H | 179.305 | 160.122 | 185.652 |
| C | 179.022 | 158.548 | 183.243 |
| H | 179.877 | 158.937 | 182.673 |
| H | 178.404 | 157.976 | 182.540 |
| C | 179.599 | 157.597 | 184.302 |
| H | 178.804 | 157.269 | 184.983 |
| H | 180.325 | 158.145 | 184.917 |

|   |         |         |         |
|---|---------|---------|---------|
| C | 180.271 | 156.370 | 183.676 |
| H | 180.866 | 156.673 | 182.800 |
| H | 179.489 | 155.705 | 183.294 |
| C | 181.185 | 155.617 | 184.662 |
| C | 182.557 | 156.295 | 184.765 |
| H | 183.172 | 155.817 | 185.537 |
| H | 183.095 | 156.214 | 183.812 |
| H | 182.470 | 157.360 | 185.013 |
| H | 180.708 | 155.662 | 185.654 |
| C | 181.337 | 154.130 | 184.312 |
| H | 182.036 | 153.679 | 185.031 |
| H | 181.811 | 154.030 | 183.326 |
| C | 180.004 | 153.361 | 184.354 |
| H | 179.512 | 153.416 | 183.377 |
| H | 179.328 | 153.862 | 185.061 |
| C | 180.152 | 151.898 | 184.782 |
| H | 179.161 | 151.466 | 184.949 |
| H | 180.665 | 151.879 | 185.755 |
| C | 180.933 | 151.023 | 183.792 |
| C | 180.158 | 150.728 | 182.504 |
| H | 179.179 | 150.304 | 182.715 |
| H | 180.008 | 151.611 | 181.875 |
| H | 180.688 | 149.974 | 181.915 |
| H | 181.844 | 151.580 | 183.537 |
| C | 181.388 | 149.714 | 184.444 |
| H | 181.929 | 149.956 | 185.367 |
| H | 182.112 | 149.214 | 183.786 |
| C | 180.278 | 148.715 | 184.783 |
| H | 179.851 | 148.305 | 183.860 |
| H | 179.454 | 149.208 | 185.313 |
| C | 180.854 | 147.599 | 185.646 |
| H | 181.282 | 148.058 | 186.550 |
| H | 181.696 | 147.139 | 185.106 |
| C | 179.913 | 146.478 | 186.087 |

|   |         |         |         |
|---|---------|---------|---------|
| C | 179.362 | 145.680 | 184.905 |
| H | 178.729 | 144.853 | 185.241 |
| H | 178.765 | 146.310 | 184.242 |
| H | 180.184 | 145.249 | 184.318 |
| H | 179.060 | 146.929 | 186.615 |
| C | 180.681 | 145.571 | 187.050 |
| H | 180.798 | 146.028 | 188.039 |
| H | 180.179 | 144.610 | 187.170 |
| H | 181.685 | 145.371 | 186.657 |

**BChl a** (chain:3,resid:101)

|    |         |         |         |
|----|---------|---------|---------|
| MG | 177.199 | 151.204 | 179.225 |
| N  | 177.539 | 153.305 | 178.659 |
| C  | 178.635 | 153.834 | 178.011 |
| C  | 179.810 | 153.136 | 177.903 |
| C  | 181.147 | 153.569 | 177.299 |
| C  | 182.089 | 152.303 | 177.450 |
| C  | 181.326 | 151.322 | 178.183 |
| C  | 181.343 | 150.027 | 178.729 |
| C  | 182.495 | 149.076 | 178.797 |
| H  | 183.428 | 149.600 | 178.578 |
| H  | 182.578 | 148.615 | 179.789 |
| H  | 182.405 | 148.269 | 178.060 |
| O  | 183.210 | 152.273 | 176.952 |
| C  | 181.732 | 154.752 | 178.041 |
| O  | 182.241 | 154.741 | 179.137 |
| O  | 181.562 | 155.899 | 177.311 |
| C  | 181.886 | 157.137 | 177.949 |
| H  | 181.103 | 157.844 | 177.660 |
| H  | 182.860 | 157.483 | 177.589 |
| H  | 181.918 | 157.007 | 179.033 |
| H  | 181.062 | 153.833 | 176.241 |
| C  | 180.016 | 151.828 | 178.389 |
| N  | 179.219 | 150.940 | 178.997 |

|   |         |         |         |
|---|---------|---------|---------|
| C | 180.015 | 149.822 | 179.230 |
| C | 179.504 | 148.678 | 179.885 |
| H | 180.204 | 147.867 | 180.038 |
| C | 178.235 | 148.476 | 180.387 |
| C | 177.834 | 147.227 | 181.151 |
| C | 176.357 | 147.496 | 181.533 |
| C | 176.066 | 147.378 | 183.036 |
| H | 176.183 | 146.340 | 183.360 |
| H | 175.045 | 147.685 | 183.275 |
| H | 176.758 | 147.993 | 183.621 |
| H | 175.704 | 146.794 | 181.006 |
| C | 178.012 | 145.933 | 180.350 |
| C | 177.666 | 144.710 | 181.191 |
| H | 177.809 | 143.783 | 180.628 |
| H | 176.624 | 144.726 | 181.519 |
| H | 178.290 | 144.696 | 182.092 |
| H | 179.047 | 145.860 | 179.989 |
| H | 177.366 | 145.981 | 179.466 |
| H | 178.447 | 147.153 | 182.062 |
| N | 177.188 | 149.363 | 180.306 |
| C | 176.108 | 148.875 | 180.950 |
| C | 174.890 | 149.547 | 181.117 |
| H | 174.098 | 149.000 | 181.607 |
| C | 174.587 | 150.868 | 180.789 |
| C | 173.319 | 151.555 | 181.038 |
| C | 173.476 | 152.850 | 180.587 |
| C | 172.444 | 153.921 | 180.463 |
| H | 172.092 | 154.289 | 181.430 |
| H | 172.841 | 154.757 | 179.897 |
| H | 171.574 | 153.561 | 179.907 |
| C | 172.114 | 150.958 | 181.654 |
| O | 172.080 | 149.763 | 181.923 |
| C | 170.919 | 151.828 | 181.981 |
| H | 170.169 | 151.218 | 182.481 |

|   |         |         |         |
|---|---------|---------|---------|
| H | 171.210 | 152.651 | 182.641 |
| H | 170.476 | 152.254 | 181.076 |
| N | 175.473 | 151.749 | 180.209 |
| C | 174.844 | 152.957 | 180.103 |
| C | 175.417 | 154.115 | 179.551 |
| H | 174.827 | 155.014 | 179.645 |
| C | 176.609 | 154.264 | 178.857 |
| C | 177.035 | 155.594 | 178.234 |
| C | 177.270 | 156.683 | 179.287 |
| H | 176.361 | 156.880 | 179.865 |
| H | 178.047 | 156.367 | 179.991 |
| H | 177.591 | 157.616 | 178.809 |
| H | 176.260 | 155.946 | 177.546 |
| C | 178.326 | 155.220 | 177.457 |
| H | 179.122 | 155.932 | 177.686 |
| C | 178.157 | 155.147 | 175.907 |
| H | 177.151 | 155.482 | 175.622 |
| H | 178.241 | 154.106 | 175.591 |
| C | 179.213 | 155.933 | 175.081 |
| H | 179.267 | 155.527 | 174.069 |
| H | 180.191 | 155.828 | 175.556 |
| C | 178.873 | 157.395 | 175.016 |
| O | 178.840 | 158.166 | 175.954 |
| O | 178.553 | 157.783 | 173.733 |
| C | 177.800 | 158.996 | 173.605 |
| H | 177.675 | 159.417 | 174.609 |
| H | 176.815 | 158.693 | 173.229 |
| C | 178.324 | 160.079 | 172.706 |
| H | 177.507 | 160.744 | 172.418 |
| C | 179.548 | 160.406 | 172.276 |
| C | 180.792 | 159.599 | 172.522 |
| H | 181.473 | 160.107 | 173.218 |
| H | 180.553 | 158.618 | 172.927 |
| H | 181.351 | 159.460 | 171.587 |

|   |         |         |         |
|---|---------|---------|---------|
| C | 179.736 | 161.673 | 171.467 |
| H | 178.763 | 162.016 | 171.101 |
| H | 180.347 | 161.444 | 170.582 |
| C | 180.435 | 162.829 | 172.216 |
| H | 180.609 | 163.642 | 171.496 |
| H | 181.428 | 162.492 | 172.542 |
| C | 179.701 | 163.385 | 173.448 |
| H | 180.272 | 164.246 | 173.827 |
| H | 179.723 | 162.629 | 174.243 |
| C | 178.227 | 163.787 | 173.237 |
| C | 178.007 | 164.688 | 172.015 |
| H | 176.943 | 164.916 | 171.880 |
| H | 178.546 | 165.639 | 172.093 |
| H | 178.355 | 164.196 | 171.105 |
| H | 177.693 | 162.853 | 173.034 |
| C | 177.591 | 164.364 | 174.534 |
| H | 178.095 | 163.924 | 175.404 |
| H | 176.555 | 164.010 | 174.589 |
| C | 177.526 | 165.895 | 174.680 |
| H | 176.949 | 166.127 | 175.584 |
| H | 176.936 | 166.301 | 173.849 |
| C | 178.851 | 166.673 | 174.730 |
| H | 178.601 | 167.745 | 174.702 |
| H | 179.430 | 166.472 | 173.820 |
| C | 179.750 | 166.416 | 175.951 |
| C | 179.045 | 166.773 | 177.269 |
| H | 179.746 | 166.770 | 178.112 |
| H | 178.565 | 167.760 | 177.229 |
| H | 178.259 | 166.048 | 177.499 |
| H | 179.957 | 165.339 | 175.992 |
| C | 181.139 | 167.083 | 175.766 |
| H | 181.675 | 166.502 | 175.003 |
| H | 181.718 | 166.969 | 176.694 |
| C | 181.179 | 168.555 | 175.318 |

|   |         |         |         |
|---|---------|---------|---------|
| H | 180.547 | 168.676 | 174.432 |
| H | 182.202 | 168.790 | 174.986 |
| C | 180.787 | 169.589 | 176.382 |
| H | 181.537 | 169.567 | 177.187 |
| H | 179.836 | 169.315 | 176.850 |
| C | 180.660 | 171.022 | 175.834 |
| C | 179.388 | 171.202 | 174.995 |
| H | 179.302 | 172.221 | 174.599 |
| H | 179.358 | 170.506 | 174.151 |
| H | 178.495 | 171.015 | 175.602 |
| H | 181.532 | 171.213 | 175.189 |
| C | 180.682 | 172.051 | 176.971 |
| H | 181.635 | 172.016 | 177.521 |
| H | 180.518 | 173.066 | 176.584 |
| H | 179.886 | 171.855 | 177.697 |

**BChl a** (chain:4,resid:102)

|    |         |         |         |
|----|---------|---------|---------|
| MG | 184.212 | 147.664 | 174.258 |
| N  | 184.668 | 149.415 | 173.072 |
| C  | 184.025 | 150.624 | 173.134 |
| C  | 182.806 | 150.777 | 173.753 |
| C  | 181.874 | 151.971 | 173.726 |
| C  | 180.516 | 151.431 | 174.385 |
| C  | 180.800 | 150.093 | 174.827 |
| C  | 180.256 | 148.960 | 175.440 |
| C  | 178.880 | 148.766 | 175.985 |
| H  | 178.126 | 149.061 | 175.247 |
| H  | 178.690 | 147.724 | 176.253 |
| H  | 178.701 | 149.379 | 176.874 |
| O  | 179.492 | 152.093 | 174.428 |
| C  | 181.558 | 152.448 | 172.333 |
| O  | 181.668 | 151.798 | 171.313 |
| O  | 181.085 | 153.713 | 172.346 |
| C  | 180.623 | 154.154 | 171.064 |



|   |         |         |         |
|---|---------|---------|---------|
| H | 180.278 | 155.177 | 171.205 |
| H | 179.800 | 153.528 | 170.718 |
| H | 181.434 | 154.090 | 170.336 |
| H | 182.206 | 152.823 | 174.331 |
| C | 182.113 | 149.749 | 174.410 |
| N | 182.416 | 148.484 | 174.704 |
| C | 181.310 | 147.977 | 175.359 |
| C | 181.267 | 146.647 | 175.799 |
| H | 180.382 | 146.374 | 176.349 |
| C | 182.186 | 145.644 | 175.557 |
| C | 181.922 | 144.193 | 175.917 |
| C | 183.187 | 143.468 | 175.416 |
| C | 182.906 | 142.214 | 174.585 |
| H | 182.478 | 141.432 | 175.219 |
| H | 183.817 | 141.821 | 174.125 |
| H | 182.184 | 142.430 | 173.793 |
| H | 183.779 | 143.176 | 176.286 |
| C | 181.655 | 143.962 | 177.408 |
| C | 181.276 | 142.517 | 177.733 |
| H | 181.090 | 142.385 | 178.802 |
| H | 182.069 | 141.821 | 177.449 |
| H | 180.372 | 142.209 | 177.200 |
| H | 180.865 | 144.637 | 177.760 |
| H | 182.572 | 144.245 | 177.940 |
| H | 181.054 | 143.853 | 175.341 |
| N | 183.377 | 145.788 | 174.898 |
| C | 183.967 | 144.579 | 174.732 |
| C | 185.160 | 144.352 | 174.057 |
| H | 185.521 | 143.333 | 174.044 |
| C | 185.915 | 145.263 | 173.310 |
| C | 187.048 | 144.921 | 172.463 |
| C | 187.383 | 146.074 | 171.757 |
| C | 188.457 | 146.302 | 170.735 |
| H | 188.357 | 145.623 | 169.884 |

|   |         |         |         |
|---|---------|---------|---------|
| H | 188.414 | 147.317 | 170.334 |
| H | 189.461 | 146.164 | 171.156 |
| C | 187.695 | 143.604 | 172.406 |
| O | 187.487 | 142.724 | 173.241 |
| C | 188.673 | 143.325 | 171.291 |
| H | 189.063 | 142.318 | 171.424 |
| H | 188.204 | 143.419 | 170.307 |
| H | 189.506 | 144.026 | 171.321 |
| N | 185.617 | 146.596 | 173.156 |
| C | 186.478 | 147.098 | 172.210 |
| C | 186.478 | 148.426 | 171.757 |
| H | 187.215 | 148.681 | 171.003 |
| C | 185.681 | 149.473 | 172.179 |
| C | 185.832 | 150.864 | 171.594 |
| C | 185.578 | 150.892 | 170.094 |
| H | 186.160 | 150.128 | 169.574 |
| H | 184.515 | 150.710 | 169.895 |
| H | 185.865 | 151.869 | 169.698 |
| H | 186.852 | 151.212 | 171.783 |
| C | 184.790 | 151.694 | 172.378 |
| H | 184.123 | 152.218 | 171.685 |
| C | 185.406 | 152.728 | 173.330 |
| H | 186.132 | 152.240 | 173.989 |
| H | 184.618 | 153.142 | 173.968 |
| C | 186.088 | 153.892 | 172.591 |
| H | 186.279 | 154.702 | 173.307 |
| H | 185.432 | 154.269 | 171.801 |
| C | 187.414 | 153.574 | 171.932 |
| O | 187.677 | 153.758 | 170.761 |
| O | 188.298 | 153.107 | 172.843 |
| C | 189.646 | 152.860 | 172.377 |
| H | 190.231 | 152.881 | 173.303 |
| H | 189.949 | 153.696 | 171.746 |
| C | 189.783 | 151.536 | 171.684 |

|   |         |         |         |
|---|---------|---------|---------|
| H | 189.180 | 150.733 | 172.106 |
| C | 190.611 | 151.256 | 170.666 |
| C | 191.505 | 152.272 | 169.999 |
| H | 191.332 | 152.281 | 168.915 |
| H | 191.353 | 153.289 | 170.368 |
| H | 192.564 | 152.019 | 170.148 |
| C | 190.717 | 149.854 | 170.106 |
| H | 190.695 | 149.927 | 169.011 |
| H | 189.843 | 149.265 | 170.410 |
| C | 191.997 | 149.083 | 170.503 |
| H | 192.878 | 149.680 | 170.235 |
| H | 192.048 | 148.177 | 169.889 |
| C | 192.028 | 148.730 | 171.995 |
| H | 191.121 | 148.157 | 172.228 |
| H | 191.941 | 149.669 | 172.557 |
| C | 193.256 | 147.942 | 172.534 |
| C | 194.565 | 148.301 | 171.818 |
| H | 195.414 | 147.796 | 172.295 |
| H | 194.550 | 148.000 | 170.765 |
| H | 194.756 | 149.382 | 171.852 |
| H | 193.374 | 148.253 | 173.582 |
| C | 193.025 | 146.417 | 172.591 |
| H | 192.146 | 146.234 | 173.220 |
| H | 193.871 | 145.951 | 173.117 |
| C | 192.815 | 145.707 | 171.252 |
| H | 193.741 | 145.729 | 170.659 |
| H | 192.067 | 146.253 | 170.670 |
| C | 192.339 | 144.257 | 171.410 |
| H | 191.344 | 144.270 | 171.868 |
| H | 192.994 | 143.725 | 172.113 |
| C | 192.287 | 143.501 | 170.073 |
| C | 191.530 | 144.319 | 169.007 |
| H | 191.272 | 143.708 | 168.138 |
| H | 190.580 | 144.686 | 169.408 |

|   |         |         |         |
|---|---------|---------|---------|
| H | 192.101 | 145.182 | 168.650 |
| H | 193.336 | 143.395 | 169.766 |
| C | 191.662 | 142.086 | 170.138 |
| H | 192.036 | 141.512 | 169.279 |
| H | 190.586 | 142.183 | 169.964 |
| C | 191.853 | 141.230 | 171.399 |
| H | 191.415 | 141.744 | 172.263 |
| H | 192.920 | 141.090 | 171.617 |
| C | 191.157 | 139.877 | 171.189 |
| H | 191.656 | 139.376 | 170.353 |
| H | 190.135 | 140.088 | 170.853 |
| C | 191.079 | 138.881 | 172.358 |
| C | 190.198 | 137.685 | 171.974 |
| H | 190.112 | 136.969 | 172.797 |
| H | 189.190 | 137.990 | 171.683 |
| H | 190.640 | 137.143 | 171.129 |
| H | 190.613 | 139.391 | 173.214 |
| C | 192.459 | 138.364 | 172.771 |
| H | 193.121 | 139.174 | 173.097 |
| H | 192.382 | 137.639 | 173.589 |
| H | 192.928 | 137.841 | 171.929 |

**BChI a** (chain:5,resid:202)

|    |         |         |         |
|----|---------|---------|---------|
| MG | 187.379 | 143.834 | 167.444 |
| N  | 187.734 | 145.863 | 166.759 |
| C  | 188.561 | 146.271 | 165.746 |
| C  | 189.504 | 145.431 | 165.193 |
| C  | 190.539 | 145.730 | 164.119 |
| C  | 191.334 | 144.351 | 163.928 |
| C  | 190.746 | 143.428 | 164.895 |
| C  | 190.795 | 142.129 | 165.402 |
| C  | 191.704 | 141.006 | 165.017 |
| H  | 192.657 | 141.383 | 164.643 |
| H  | 191.904 | 140.339 | 165.863 |

|   |         |         |         |
|---|---------|---------|---------|
| H | 191.272 | 140.392 | 164.214 |
| O | 192.224 | 144.189 | 163.114 |
| C | 191.506 | 146.842 | 164.473 |
| O | 191.623 | 147.378 | 165.557 |
| O | 192.265 | 147.151 | 163.406 |
| C | 193.272 | 148.142 | 163.654 |
| H | 193.788 | 148.280 | 162.704 |
| H | 193.969 | 147.789 | 164.415 |
| H | 192.814 | 149.073 | 163.987 |
| H | 190.072 | 145.990 | 163.163 |
| C | 189.697 | 144.096 | 165.580 |
| N | 189.100 | 143.301 | 166.484 |
| C | 189.736 | 142.073 | 166.387 |
| C | 189.310 | 140.959 | 167.133 |
| H | 189.842 | 140.029 | 166.975 |
| C | 188.235 | 140.897 | 168.004 |
| C | 187.759 | 139.603 | 168.634 |
| C | 186.720 | 140.080 | 169.678 |
| C | 187.102 | 139.865 | 171.146 |
| H | 187.177 | 138.793 | 171.361 |
| H | 186.325 | 140.278 | 171.800 |
| H | 188.048 | 140.349 | 171.397 |
| H | 185.772 | 139.558 | 169.508 |
| C | 187.110 | 138.670 | 167.593 |
| C | 186.987 | 137.248 | 168.143 |
| H | 186.271 | 136.633 | 167.586 |
| H | 186.637 | 137.258 | 169.183 |
| H | 187.963 | 136.765 | 168.118 |
| H | 187.698 | 138.668 | 166.672 |
| H | 186.118 | 139.071 | 167.344 |
| H | 188.582 | 139.055 | 169.104 |
| N | 187.433 | 141.939 | 168.370 |
| C | 186.532 | 141.545 | 169.310 |
| C | 185.562 | 142.344 | 169.896 |

|   |         |         |         |
|---|---------|---------|---------|
| H | 184.908 | 141.862 | 170.611 |
| C | 185.317 | 143.710 | 169.690 |
| C | 184.280 | 144.516 | 170.319 |
| C | 184.455 | 145.818 | 169.855 |
| C | 183.604 | 147.025 | 170.093 |
| H | 183.605 | 147.345 | 171.142 |
| H | 183.940 | 147.855 | 169.483 |
| H | 182.561 | 146.829 | 169.821 |
| C | 183.228 | 144.009 | 171.220 |
| O | 183.115 | 142.815 | 171.475 |
| C | 182.233 | 144.974 | 171.847 |
| H | 181.600 | 144.412 | 172.534 |
| H | 182.738 | 145.774 | 172.399 |
| H | 181.598 | 145.445 | 171.090 |
| N | 186.074 | 144.511 | 168.868 |
| C | 185.585 | 145.790 | 168.963 |
| C | 186.122 | 146.898 | 168.281 |
| H | 185.702 | 147.860 | 168.541 |
| C | 187.074 | 146.927 | 167.278 |
| C | 187.575 | 148.224 | 166.653 |
| C | 188.551 | 148.939 | 167.595 |
| H | 188.060 | 149.173 | 168.544 |
| H | 189.414 | 148.295 | 167.797 |
| H | 188.913 | 149.867 | 167.142 |
| H | 186.728 | 148.884 | 166.433 |
| C | 188.269 | 147.715 | 165.369 |
| H | 189.177 | 148.270 | 165.138 |
| C | 187.315 | 147.725 | 164.156 |
| H | 186.409 | 147.179 | 164.450 |
| H | 187.767 | 147.158 | 163.333 |
| C | 186.869 | 149.104 | 163.666 |
| H | 186.504 | 149.709 | 164.507 |
| H | 186.015 | 149.000 | 162.989 |
| C | 187.938 | 149.901 | 162.956 |

|   |         |         |         |
|---|---------|---------|---------|
| O | 189.136 | 149.715 | 163.027 |
| O | 187.365 | 150.888 | 162.224 |
| C | 188.236 | 151.752 | 161.463 |
| H | 187.906 | 151.654 | 160.423 |
| H | 189.254 | 151.363 | 161.542 |
| C | 188.111 | 153.162 | 161.962 |
| H | 187.694 | 153.261 | 162.963 |
| C | 188.482 | 154.248 | 161.275 |
| C | 189.108 | 154.142 | 159.903 |
| H | 190.177 | 153.900 | 159.971 |
| H | 188.637 | 153.340 | 159.323 |
| H | 189.014 | 155.075 | 159.342 |
| C | 188.332 | 155.638 | 161.845 |
| H | 187.859 | 155.571 | 162.834 |
| H | 187.643 | 156.210 | 161.204 |
| C | 189.663 | 156.405 | 161.959 |
| H | 189.456 | 157.398 | 162.379 |
| H | 190.071 | 156.569 | 160.956 |
| C | 190.679 | 155.673 | 162.840 |
| H | 190.997 | 154.745 | 162.342 |
| H | 190.162 | 155.348 | 163.753 |
| C | 191.919 | 156.496 | 163.220 |
| C | 192.703 | 156.946 | 161.980 |
| H | 193.604 | 157.500 | 162.263 |
| H | 193.015 | 156.070 | 161.394 |
| H | 192.091 | 157.583 | 161.337 |
| H | 191.563 | 157.394 | 163.750 |
| C | 192.835 | 155.727 | 164.188 |
| H | 193.708 | 156.352 | 164.409 |
| H | 193.226 | 154.839 | 163.670 |
| C | 192.152 | 155.297 | 165.505 |
| H | 191.241 | 155.890 | 165.660 |
| H | 192.799 | 155.532 | 166.357 |
| C | 191.775 | 153.808 | 165.574 |

|   |         |         |         |
|---|---------|---------|---------|
| H | 191.135 | 153.542 | 164.722 |
| H | 191.156 | 153.638 | 166.467 |
| C | 192.963 | 152.827 | 165.608 |
| C | 192.443 | 151.386 | 165.697 |
| H | 193.259 | 150.654 | 165.695 |
| H | 191.861 | 151.213 | 166.612 |
| H | 191.779 | 151.147 | 164.857 |
| H | 193.502 | 152.911 | 164.654 |
| C | 193.990 | 153.148 | 166.717 |
| H | 194.499 | 154.092 | 166.484 |
| H | 194.763 | 152.372 | 166.690 |
| C | 193.402 | 153.228 | 168.130 |
| H | 192.943 | 152.263 | 168.375 |
| H | 192.585 | 153.959 | 168.153 |
| C | 194.389 | 153.573 | 169.255 |
| H | 193.802 | 153.670 | 170.179 |
| H | 194.835 | 154.561 | 169.076 |
| C | 195.510 | 152.531 | 169.482 |
| C | 196.812 | 152.915 | 168.764 |
| H | 197.565 | 152.124 | 168.871 |
| H | 196.652 | 153.086 | 167.696 |
| H | 197.229 | 153.832 | 169.197 |
| H | 195.161 | 151.569 | 169.077 |
| C | 195.775 | 152.316 | 170.978 |
| H | 194.871 | 151.968 | 171.493 |
| H | 196.556 | 151.562 | 171.140 |
| H | 196.099 | 153.245 | 171.463 |

| <b>BChl a</b> | <b>(chain:6,resid:102)</b> |         |         |
|---------------|----------------------------|---------|---------|
| MG            | 191.622                    | 139.702 | 160.155 |
| N             | 191.912                    | 141.488 | 159.002 |
| C             | 191.519                    | 142.753 | 159.360 |
| C             | 190.603                    | 143.001 | 160.350 |
| C             | 189.957                    | 144.312 | 160.740 |



|   |         |         |         |
|---|---------|---------|---------|
| C | 188.865 | 143.909 | 161.843 |
| C | 189.007 | 142.477 | 162.024 |
| C | 188.581 | 141.363 | 162.754 |
| C | 187.508 | 141.277 | 163.784 |
| H | 186.541 | 141.579 | 163.366 |
| H | 187.400 | 140.264 | 164.177 |
| H | 187.707 | 141.949 | 164.621 |
| O | 188.125 | 144.721 | 162.375 |
| C | 189.284 | 144.970 | 159.563 |
| O | 188.792 | 144.391 | 158.615 |
| O | 189.290 | 146.309 | 159.682 |
| C | 188.578 | 146.976 | 158.635 |
| H | 188.522 | 148.016 | 158.943 |
| H | 187.577 | 146.559 | 158.534 |
| H | 189.107 | 146.857 | 157.683 |
| H | 190.644 | 145.027 | 161.203 |
| C | 189.999 | 142.007 | 161.123 |
| N | 190.203 | 140.693 | 161.221 |
| C | 189.378 | 140.269 | 162.241 |
| C | 189.363 | 138.930 | 162.649 |
| H | 188.787 | 138.718 | 163.535 |
| C | 189.975 | 137.851 | 162.033 |
| C | 189.658 | 136.416 | 162.410 |
| C | 190.521 | 135.590 | 161.430 |
| C | 189.741 | 134.517 | 160.665 |
| H | 189.404 | 133.731 | 161.346 |
| H | 190.357 | 134.055 | 159.887 |
| H | 188.855 | 134.947 | 160.190 |
| H | 191.322 | 135.102 | 161.989 |
| C | 189.895 | 136.077 | 163.884 |
| C | 189.357 | 134.696 | 164.255 |
| H | 189.647 | 134.398 | 165.266 |
| H | 189.728 | 133.937 | 163.566 |
| H | 188.266 | 134.666 | 164.201 |

|   |         |         |         |
|---|---------|---------|---------|
| H | 189.425 | 136.837 | 164.521 |
| H | 190.976 | 136.131 | 164.069 |
| H | 188.602 | 136.249 | 162.179 |
| N | 190.825 | 137.907 | 160.968 |
| C | 191.160 | 136.658 | 160.557 |
| C | 191.984 | 136.363 | 159.480 |
| H | 192.165 | 135.316 | 159.282 |
| C | 192.576 | 137.250 | 158.567 |
| C | 193.290 | 136.863 | 157.364 |
| C | 193.607 | 138.041 | 156.690 |
| C | 194.391 | 138.228 | 155.426 |
| H | 193.842 | 137.899 | 154.538 |
| H | 194.666 | 139.277 | 155.281 |
| H | 195.323 | 137.655 | 155.455 |
| C | 193.557 | 135.483 | 156.935 |
| O | 193.556 | 134.530 | 157.717 |
| C | 193.817 | 135.243 | 155.465 |
| H | 193.712 | 134.179 | 155.272 |
| H | 193.118 | 135.800 | 154.835 |
| H | 194.834 | 135.546 | 155.199 |
| N | 192.474 | 138.618 | 158.615 |
| C | 193.082 | 139.117 | 157.487 |
| C | 193.118 | 140.478 | 157.130 |
| H | 193.581 | 140.719 | 156.179 |
| C | 192.561 | 141.542 | 157.809 |
| C | 192.460 | 142.952 | 157.240 |
| C | 191.185 | 143.041 | 156.388 |
| H | 191.227 | 142.301 | 155.585 |
| H | 190.302 | 142.828 | 156.998 |
| H | 191.052 | 144.045 | 155.972 |
| H | 193.342 | 143.225 | 156.655 |
| C | 192.283 | 143.768 | 158.531 |
| H | 191.742 | 144.706 | 158.373 |
| C | 193.596 | 144.008 | 159.304 |

|   |         |         |         |
|---|---------|---------|---------|
| H | 194.195 | 143.092 | 159.262 |
| H | 193.305 | 144.175 | 160.342 |
| C | 194.454 | 145.213 | 158.889 |
| H | 195.415 | 145.163 | 159.411 |
| H | 193.940 | 146.119 | 159.197 |
| C | 194.716 | 145.313 | 157.412 |
| O | 194.158 | 146.082 | 156.656 |
| O | 195.647 | 144.423 | 157.010 |
| C | 195.944 | 144.426 | 155.592 |
| H | 196.041 | 145.469 | 155.274 |
| H | 195.088 | 144.003 | 155.060 |
| C | 197.207 | 143.650 | 155.411 |
| H | 198.002 | 143.939 | 156.097 |
| C | 197.436 | 142.662 | 154.534 |
| C | 196.417 | 142.157 | 153.548 |
| H | 196.148 | 141.120 | 153.780 |
| H | 195.499 | 142.746 | 153.533 |
| H | 196.830 | 142.151 | 152.531 |
| C | 198.764 | 141.939 | 154.533 |
| H | 199.440 | 142.449 | 155.228 |
| H | 199.228 | 142.007 | 153.536 |
| C | 198.644 | 140.443 | 154.927 |
| H | 197.761 | 140.317 | 155.567 |
| H | 199.505 | 140.177 | 155.549 |
| C | 198.558 | 139.471 | 153.742 |
| H | 199.524 | 139.463 | 153.212 |
| H | 197.822 | 139.837 | 153.015 |
| C | 198.178 | 138.029 | 154.128 |
| C | 199.176 | 137.446 | 155.140 |
| H | 198.914 | 136.426 | 155.426 |
| H | 200.186 | 137.422 | 154.710 |
| H | 199.217 | 138.041 | 156.058 |
| H | 197.193 | 138.079 | 154.613 |
| C | 198.040 | 137.156 | 152.862 |

|   |         |         |         |
|---|---------|---------|---------|
| H | 199.033 | 136.774 | 152.580 |
| H | 197.718 | 137.794 | 152.027 |
| C | 197.048 | 135.983 | 152.934 |
| H | 196.981 | 135.564 | 151.929 |
| H | 196.043 | 136.375 | 153.143 |
| C | 197.385 | 134.880 | 153.948 |
| H | 197.102 | 135.234 | 154.948 |
| H | 198.475 | 134.746 | 153.984 |
| C | 196.753 | 133.472 | 153.725 |
| C | 195.445 | 133.451 | 152.924 |
| H | 195.271 | 132.447 | 152.521 |
| H | 194.581 | 133.716 | 153.534 |
| H | 195.450 | 134.147 | 152.083 |
| H | 197.486 | 132.878 | 153.158 |
| C | 196.557 | 132.830 | 155.113 |
| H | 195.912 | 133.503 | 155.689 |
| H | 197.526 | 132.830 | 155.630 |
| C | 195.951 | 131.421 | 155.193 |
| H | 195.121 | 131.327 | 154.484 |
| H | 195.494 | 131.321 | 156.186 |
| C | 196.949 | 130.264 | 155.012 |
| H | 197.939 | 130.597 | 155.354 |
| H | 197.062 | 130.007 | 153.948 |
| C | 196.566 | 129.006 | 155.813 |
| C | 195.275 | 128.359 | 155.298 |
| H | 194.987 | 127.502 | 155.914 |
| H | 194.438 | 129.067 | 155.296 |
| H | 195.411 | 127.994 | 154.273 |
| H | 196.375 | 129.334 | 156.845 |
| C | 197.716 | 127.996 | 155.857 |
| H | 198.634 | 128.461 | 156.238 |
| H | 197.474 | 127.152 | 156.512 |
| H | 197.934 | 127.594 | 154.862 |

| <b>BChI a</b> | <b>(chain:7,resid:101)</b> |         |         |
|---------------|----------------------------|---------|---------|
| MG            | 191.523                    | 135.839 | 152.280 |
| N             | 192.222                    | 137.824 | 151.659 |
| C             | 192.836                    | 138.157 | 150.469 |
| C             | 193.362                    | 137.211 | 149.634 |
| C             | 194.123                    | 137.394 | 148.324 |
| C             | 194.465                    | 135.924 | 147.855 |
| C             | 193.956                    | 135.039 | 148.874 |
| C             | 193.810                    | 133.698 | 149.273 |
| C             | 194.352                    | 132.475 | 148.605 |
| H             | 195.201                    | 132.740 | 147.972 |
| H             | 194.690                    | 131.733 | 149.336 |
| H             | 193.609                    | 131.998 | 147.953 |
| O             | 195.026                    | 135.710 | 146.785 |
| C             | 195.396                    | 138.196 | 148.493 |
| O             | 196.426                    | 137.813 | 148.999 |
| O             | 195.231                    | 139.466 | 148.016 |
| C             | 196.331                    | 140.360 | 148.210 |
| H             | 195.894                    | 141.357 | 148.302 |
| H             | 197.004                    | 140.310 | 147.347 |
| H             | 196.885                    | 140.095 | 149.113 |
| H             | 193.511                    | 137.886 | 147.562 |
| C             | 193.298                    | 135.822 | 149.857 |
| N             | 192.737                    | 135.073 | 150.814 |
| C             | 193.050                    | 133.757 | 150.488 |
| C             | 192.680                    | 132.683 | 151.329 |
| H             | 192.972                    | 131.698 | 150.994 |
| C             | 192.023                    | 132.736 | 152.539 |
| C             | 191.786                    | 131.513 | 153.415 |
| C             | 191.093                    | 132.103 | 154.668 |
| C             | 191.805                    | 131.781 | 155.988 |
| H             | 191.747                    | 130.709 | 156.197 |
| H             | 191.351                    | 132.308 | 156.831 |
| H             | 192.863                    | 132.061 | 155.939 |

|   |         |         |         |
|---|---------|---------|---------|
| H | 190.066 | 131.730 | 154.733 |
| C | 190.967 | 130.405 | 152.733 |
| C | 190.834 | 129.157 | 153.605 |
| H | 190.193 | 128.410 | 153.126 |
| H | 190.380 | 129.391 | 154.571 |
| H | 191.814 | 128.704 | 153.800 |
| H | 191.438 | 130.141 | 151.775 |
| H | 189.973 | 130.805 | 152.497 |
| H | 192.761 | 131.091 | 153.697 |
| N | 191.543 | 133.876 | 153.140 |
| C | 191.023 | 133.587 | 154.349 |
| C | 190.488 | 134.516 | 155.250 |
| H | 190.060 | 134.116 | 156.158 |
| C | 190.507 | 135.908 | 155.171 |
| C | 189.986 | 136.843 | 156.171 |
| C | 190.279 | 138.115 | 155.715 |
| C | 189.868 | 139.442 | 156.273 |
| H | 190.133 | 139.556 | 157.325 |
| H | 190.333 | 140.262 | 155.725 |
| H | 188.783 | 139.569 | 156.185 |
| C | 189.298 | 136.453 | 157.420 |
| O | 189.173 | 135.268 | 157.713 |
| C | 188.766 | 137.510 | 158.359 |
| H | 188.211 | 137.013 | 159.156 |
| H | 189.593 | 138.067 | 158.811 |
| H | 188.115 | 138.216 | 157.841 |
| N | 191.083 | 136.618 | 154.142 |
| C | 191.000 | 137.944 | 154.464 |
| C | 191.519 | 138.990 | 153.688 |
| H | 191.478 | 139.976 | 154.132 |
| C | 192.040 | 138.934 | 152.404 |
| C | 192.539 | 140.179 | 151.678 |
| C | 193.782 | 140.761 | 152.348 |
| H | 193.537 | 141.057 | 153.373 |

|   |         |         |         |
|---|---------|---------|---------|
| H | 194.587 | 140.018 | 152.389 |
| H | 194.140 | 141.640 | 151.799 |
| H | 191.762 | 140.947 | 151.685 |
| C | 192.808 | 139.659 | 150.251 |
| H | 193.749 | 140.043 | 149.855 |
| C | 191.674 | 139.977 | 149.257 |
| H | 190.751 | 139.527 | 149.638 |
| H | 191.879 | 139.492 | 148.297 |
| C | 191.366 | 141.472 | 149.033 |
| H | 191.133 | 141.938 | 149.997 |
| H | 190.489 | 141.571 | 148.389 |
| C | 192.492 | 142.278 | 148.445 |
| O | 193.571 | 142.494 | 148.962 |
| O | 192.137 | 142.808 | 147.235 |
| C | 193.060 | 143.744 | 146.659 |
| H | 193.054 | 143.554 | 145.583 |
| H | 194.059 | 143.537 | 147.058 |
| C | 192.651 | 145.144 | 147.009 |
| H | 192.120 | 145.224 | 147.956 |
| C | 192.919 | 146.264 | 146.327 |
| C | 193.678 | 146.289 | 145.024 |
| H | 194.662 | 146.763 | 145.151 |
| H | 193.853 | 145.290 | 144.618 |
| H | 193.140 | 146.876 | 144.268 |
| C | 192.520 | 147.607 | 146.893 |
| H | 191.850 | 147.453 | 147.747 |
| H | 191.951 | 148.175 | 146.143 |
| C | 193.722 | 148.461 | 147.350 |
| H | 193.341 | 149.378 | 147.823 |
| H | 194.294 | 148.786 | 146.470 |
| C | 194.645 | 147.717 | 148.320 |
| H | 195.122 | 146.887 | 147.785 |
| H | 194.038 | 147.245 | 149.104 |
| C | 195.721 | 148.588 | 148.988 |

|   |         |         |         |
|---|---------|---------|---------|
| C | 196.584 | 149.347 | 147.963 |
| H | 197.413 | 149.866 | 148.461 |
| H | 197.017 | 148.679 | 147.212 |
| H | 195.991 | 150.100 | 147.432 |
| H | 195.194 | 149.362 | 149.569 |
| C | 196.549 | 147.782 | 150.020 |
| H | 195.907 | 147.602 | 150.892 |
| H | 197.371 | 148.421 | 150.376 |
| C | 197.129 | 146.421 | 149.595 |
| H | 196.314 | 145.714 | 149.392 |
| H | 197.659 | 146.014 | 150.465 |
| C | 198.074 | 146.456 | 148.389 |
| H | 198.771 | 147.300 | 148.497 |
| H | 197.486 | 146.661 | 147.486 |
| C | 198.878 | 145.164 | 148.152 |
| C | 199.933 | 144.911 | 149.239 |
| H | 200.513 | 144.008 | 149.014 |
| H | 200.637 | 145.744 | 149.336 |
| H | 199.467 | 144.759 | 150.217 |
| H | 198.169 | 144.325 | 148.209 |
| C | 199.456 | 145.126 | 146.715 |
| H | 198.626 | 144.889 | 146.037 |
| H | 200.166 | 144.292 | 146.636 |
| C | 200.112 | 146.404 | 146.163 |
| H | 199.358 | 147.201 | 146.127 |
| H | 200.393 | 146.209 | 145.118 |
| C | 201.352 | 146.908 | 146.912 |
| H | 202.048 | 146.071 | 147.056 |
| H | 201.074 | 147.244 | 147.919 |
| C | 202.087 | 148.056 | 146.198 |
| C | 201.240 | 149.335 | 146.157 |
| H | 201.747 | 150.121 | 145.581 |
| H | 200.267 | 149.160 | 145.688 |
| H | 201.053 | 149.713 | 147.172 |



|   |         |         |         |
|---|---------|---------|---------|
| H | 202.275 | 147.748 | 145.162 |
| C | 203.441 | 148.332 | 146.862 |
| H | 204.089 | 147.449 | 146.830 |
| H | 203.974 | 149.154 | 146.363 |
| H | 203.308 | 148.600 | 147.919 |

**BChI a** (chain:8,resid:102)

|    |         |         |         |
|----|---------|---------|---------|
| MG | 191.969 | 131.704 | 144.089 |
| N  | 192.100 | 133.506 | 142.966 |
| C  | 192.096 | 134.766 | 143.497 |
| C  | 191.738 | 135.042 | 144.793 |
| C  | 191.694 | 136.382 | 145.495 |
| C  | 191.053 | 136.066 | 146.922 |
| C  | 190.953 | 134.611 | 146.987 |
| C  | 190.663 | 133.510 | 147.795 |
| C  | 190.108 | 133.486 | 149.176 |
| H  | 190.604 | 134.223 | 149.813 |
| H  | 189.040 | 133.740 | 149.185 |
| H  | 190.214 | 132.509 | 149.654 |
| O  | 190.773 | 136.933 | 147.724 |
| C  | 190.914 | 137.425 | 144.744 |
| O  | 190.021 | 137.198 | 143.956 |
| O  | 191.350 | 138.668 | 145.017 |
| C  | 190.666 | 139.676 | 144.261 |
| H  | 191.084 | 140.627 | 144.585 |
| H  | 189.590 | 139.641 | 144.445 |
| H  | 190.821 | 139.486 | 143.199 |
| H  | 192.699 | 136.775 | 145.685 |
| C  | 191.352 | 134.087 | 145.732 |
| N  | 191.311 | 132.751 | 145.696 |
| C  | 190.939 | 132.360 | 146.967 |
| C  | 190.848 | 131.004 | 147.297 |
| H  | 190.651 | 130.767 | 148.333 |
| C  | 190.957 | 129.933 | 146.432 |

|   |         |         |         |
|---|---------|---------|---------|
| C | 190.546 | 128.537 | 146.848 |
| C | 190.787 | 127.703 | 145.575 |
| C | 189.583 | 126.866 | 145.143 |
| H | 189.371 | 126.098 | 145.894 |
| H | 189.761 | 126.369 | 144.186 |
| H | 188.693 | 127.495 | 145.046 |
| H | 191.629 | 127.037 | 145.761 |
| C | 191.263 | 128.012 | 148.093 |
| C | 190.655 | 126.711 | 148.610 |
| H | 191.213 | 126.303 | 149.456 |
| H | 190.636 | 125.947 | 147.830 |
| H | 189.618 | 126.854 | 148.935 |
| H | 191.222 | 128.768 | 148.885 |
| H | 192.322 | 127.861 | 147.845 |
| H | 189.472 | 128.558 | 147.058 |
| N | 191.325 | 129.972 | 145.116 |
| C | 191.242 | 128.736 | 144.559 |
| C | 191.559 | 128.408 | 143.249 |
| H | 191.462 | 127.364 | 142.982 |
| C | 191.964 | 129.263 | 142.214 |
| C | 192.191 | 128.881 | 140.831 |
| C | 192.483 | 130.050 | 140.133 |
| C | 192.834 | 130.235 | 138.686 |
| H | 191.942 | 130.203 | 138.045 |
| H | 193.328 | 131.193 | 138.517 |
| H | 193.507 | 129.451 | 138.331 |
| C | 192.076 | 127.516 | 140.284 |
| O | 192.285 | 126.507 | 140.954 |
| C | 191.669 | 127.387 | 138.829 |
| H | 191.208 | 126.414 | 138.671 |
| H | 190.964 | 128.170 | 138.526 |
| H | 192.541 | 127.459 | 138.177 |
| N | 192.108 | 130.621 | 142.338 |
| C | 192.413 | 131.120 | 141.093 |

|   |         |         |         |
|---|---------|---------|---------|
| C | 192.564 | 132.483 | 140.794 |
| H | 192.805 | 132.733 | 139.767 |
| C | 192.409 | 133.559 | 141.648 |
| C | 192.506 | 134.994 | 141.174 |
| C | 191.254 | 135.417 | 140.398 |
| H | 191.134 | 134.816 | 139.491 |
| H | 190.366 | 135.284 | 141.026 |
| H | 191.343 | 136.471 | 140.132 |
| H | 193.387 | 135.093 | 140.543 |
| C | 192.629 | 135.769 | 142.508 |
| H | 192.030 | 136.681 | 142.492 |
| C | 194.077 | 136.096 | 142.915 |
| H | 194.693 | 135.212 | 142.723 |
| H | 194.125 | 136.285 | 143.994 |
| C | 194.629 | 137.319 | 142.183 |
| H | 195.696 | 137.432 | 142.398 |
| H | 194.099 | 138.210 | 142.530 |
| C | 194.404 | 137.202 | 140.698 |
| O | 193.527 | 137.783 | 140.092 |
| O | 195.321 | 136.388 | 140.125 |
| C | 195.358 | 136.344 | 138.666 |
| H | 196.377 | 136.635 | 138.409 |
| H | 194.665 | 137.104 | 138.301 |
| C | 195.004 | 135.018 | 138.079 |
| H | 193.937 | 134.810 | 138.002 |
| C | 195.863 | 134.159 | 137.506 |
| C | 197.363 | 134.284 | 137.562 |
| H | 197.794 | 134.316 | 136.553 |
| H | 197.705 | 135.159 | 138.118 |
| H | 197.790 | 133.401 | 138.055 |
| C | 195.332 | 133.050 | 136.630 |
| H | 195.496 | 133.363 | 135.587 |
| H | 194.245 | 132.984 | 136.755 |
| C | 195.925 | 131.641 | 136.750 |

|   |         |         |         |
|---|---------|---------|---------|
| H | 195.677 | 131.205 | 137.726 |
| H | 197.017 | 131.672 | 136.685 |
| C | 195.352 | 130.766 | 135.631 |
| H | 195.671 | 131.169 | 134.658 |
| H | 194.256 | 130.858 | 135.647 |
| C | 195.688 | 129.271 | 135.687 |
| C | 197.194 | 128.996 | 135.611 |
| H | 197.400 | 127.920 | 135.643 |
| H | 197.614 | 129.391 | 134.677 |
| H | 197.731 | 129.456 | 136.447 |
| H | 195.323 | 128.893 | 136.654 |
| C | 194.917 | 128.544 | 134.570 |
| H | 195.350 | 128.813 | 133.596 |
| H | 193.884 | 128.925 | 134.556 |
| C | 194.839 | 127.021 | 134.709 |
| H | 195.825 | 126.560 | 134.576 |
| H | 194.220 | 126.639 | 133.891 |
| C | 194.235 | 126.570 | 136.051 |
| H | 193.624 | 127.386 | 136.461 |
| H | 195.036 | 126.401 | 136.782 |
| C | 193.345 | 125.318 | 135.938 |
| C | 191.916 | 125.719 | 135.544 |
| H | 191.346 | 126.048 | 136.422 |
| H | 191.922 | 126.569 | 134.853 |
| H | 191.362 | 124.901 | 135.075 |
| H | 193.746 | 124.689 | 135.133 |
| C | 193.387 | 124.488 | 137.226 |
| H | 192.980 | 125.072 | 138.062 |
| H | 194.440 | 124.304 | 137.467 |
| C | 192.663 | 123.149 | 137.127 |
| H | 193.196 | 122.521 | 136.401 |
| H | 191.659 | 123.299 | 136.714 |
| C | 192.542 | 122.421 | 138.472 |
| H | 191.760 | 122.904 | 139.069 |

|   |         |         |         |
|---|---------|---------|---------|
| H | 193.464 | 122.534 | 139.050 |
| C | 192.229 | 120.923 | 138.341 |
| C | 191.071 | 120.685 | 137.376 |
| H | 190.745 | 119.648 | 137.434 |
| H | 190.212 | 121.317 | 137.629 |
| H | 191.375 | 120.893 | 136.347 |
| H | 191.901 | 120.557 | 139.318 |
| C | 193.475 | 120.119 | 137.954 |
| H | 194.285 | 120.294 | 138.669 |
| H | 193.270 | 119.045 | 137.945 |
| H | 193.841 | 120.389 | 136.958 |

**BChl a** (chain:9,resid:101)

|    |         |         |         |
|----|---------|---------|---------|
| MG | 188.338 | 129.022 | 136.777 |
| N  | 189.118 | 130.924 | 136.018 |
| C  | 189.305 | 131.286 | 134.701 |
| C  | 189.233 | 130.373 | 133.681 |
| C  | 189.405 | 130.587 | 132.188 |
| C  | 189.260 | 129.121 | 131.553 |
| C  | 189.013 | 128.236 | 132.660 |
| C  | 188.779 | 126.899 | 133.028 |
| C  | 188.716 | 125.685 | 132.158 |
| H  | 189.290 | 125.839 | 131.244 |
| H  | 189.115 | 124.801 | 132.667 |
| H  | 187.693 | 125.455 | 131.837 |
| O  | 189.336 | 128.914 | 130.348 |
| C  | 190.710 | 131.190 | 131.734 |
| O  | 191.766 | 131.200 | 132.335 |
| O  | 190.564 | 131.727 | 130.497 |
| C  | 191.764 | 132.212 | 129.892 |
| H  | 191.472 | 132.598 | 128.916 |
| H  | 192.485 | 131.401 | 129.773 |
| H  | 192.218 | 133.000 | 130.502 |
| H  | 188.603 | 131.198 | 131.763 |

|   |         |         |         |
|---|---------|---------|---------|
| C | 188.978 | 128.998 | 133.857 |
| N | 188.732 | 128.238 | 134.931 |
| C | 188.621 | 126.938 | 134.452 |
| C | 188.402 | 125.844 | 135.318 |
| H | 188.354 | 124.869 | 134.851 |
| C | 188.274 | 125.864 | 136.689 |
| C | 188.106 | 124.604 | 137.522 |
| C | 188.118 | 125.138 | 138.975 |
| C | 189.224 | 124.538 | 139.854 |
| H | 189.024 | 123.478 | 140.038 |
| H | 189.284 | 125.040 | 140.824 |
| H | 190.201 | 124.616 | 139.366 |
| H | 187.155 | 124.932 | 139.451 |
| C | 186.826 | 123.824 | 137.184 |
| C | 186.739 | 122.513 | 137.960 |
| H | 185.792 | 122.001 | 137.762 |
| H | 186.794 | 122.680 | 139.039 |
| H | 187.571 | 121.851 | 137.689 |
| H | 186.795 | 123.621 | 136.105 |
| H | 185.959 | 124.456 | 137.412 |
| H | 188.967 | 123.941 | 137.354 |
| N | 188.296 | 126.988 | 137.480 |
| C | 188.224 | 126.641 | 138.781 |
| C | 188.258 | 127.528 | 139.861 |
| H | 188.140 | 127.097 | 140.843 |
| C | 188.514 | 128.899 | 139.843 |
| C | 188.644 | 129.768 | 141.013 |
| C | 189.040 | 131.009 | 140.545 |
| C | 189.308 | 132.268 | 141.307 |
| H | 190.015 | 132.109 | 142.123 |
| H | 189.732 | 133.030 | 140.654 |
| H | 188.393 | 132.685 | 141.743 |
| C | 188.358 | 129.364 | 142.404 |
| O | 188.100 | 128.194 | 142.675 |

|   |         |         |         |
|---|---------|---------|---------|
| C | 188.356 | 130.390 | 143.518 |
| H | 187.971 | 129.909 | 144.418 |
| H | 189.371 | 130.745 | 143.723 |
| H | 187.740 | 131.260 | 143.275 |
| N | 188.768 | 129.629 | 138.706 |
| C | 189.113 | 130.894 | 139.098 |
| C | 189.483 | 131.924 | 138.224 |
| H | 189.800 | 132.851 | 138.688 |
| C | 189.483 | 131.931 | 136.836 |
| C | 189.964 | 133.144 | 136.054 |
| C | 191.430 | 133.459 | 136.337 |
| H | 191.609 | 133.595 | 137.409 |
| H | 192.043 | 132.624 | 135.983 |
| H | 191.752 | 134.366 | 135.810 |
| H | 189.354 | 134.010 | 136.324 |
| C | 189.730 | 132.739 | 134.579 |
| H | 190.674 | 132.780 | 134.020 |
| C | 188.730 | 133.671 | 133.870 |
| H | 187.791 | 133.715 | 134.431 |
| H | 188.495 | 133.296 | 132.868 |
| C | 189.355 | 135.080 | 133.773 |
| H | 190.291 | 135.017 | 133.208 |
| H | 189.583 | 135.443 | 134.780 |
| C | 188.465 | 136.113 | 133.136 |
| O | 187.568 | 136.720 | 133.684 |
| O | 188.810 | 136.311 | 131.834 |
| C | 188.080 | 137.342 | 131.129 |
| H | 187.061 | 137.380 | 131.524 |
| H | 188.060 | 137.010 | 130.091 |
| C | 188.758 | 138.667 | 131.297 |
| H | 188.650 | 139.101 | 132.290 |
| C | 189.461 | 139.342 | 130.374 |
| C | 189.720 | 138.853 | 128.972 |
| H | 190.797 | 138.758 | 128.788 |

|   |         |         |         |
|---|---------|---------|---------|
| H | 189.279 | 137.878 | 128.769 |
| H | 189.336 | 139.571 | 128.233 |
| C | 190.034 | 140.705 | 130.706 |
| H | 189.969 | 140.862 | 131.788 |
| H | 189.410 | 141.486 | 130.244 |
| C | 191.480 | 140.913 | 130.222 |
| H | 191.479 | 141.034 | 129.131 |
| H | 192.063 | 140.011 | 130.417 |
| C | 192.188 | 142.121 | 130.843 |
| H | 191.590 | 143.025 | 130.650 |
| H | 193.145 | 142.270 | 130.318 |
| C | 192.492 | 142.049 | 132.354 |
| C | 193.217 | 143.337 | 132.774 |
| H | 193.374 | 143.371 | 133.857 |
| H | 194.203 | 143.400 | 132.292 |
| H | 192.646 | 144.230 | 132.487 |
| H | 191.540 | 142.018 | 132.901 |
| C | 193.317 | 140.803 | 132.762 |
| H | 193.947 | 141.066 | 133.623 |
| H | 194.017 | 140.561 | 131.952 |
| C | 192.482 | 139.575 | 133.162 |
| H | 191.947 | 139.157 | 132.304 |
| H | 191.694 | 139.936 | 133.834 |
| C | 193.226 | 138.454 | 133.909 |
| H | 192.458 | 137.785 | 134.317 |
| H | 193.731 | 138.890 | 134.783 |
| C | 194.245 | 137.561 | 133.159 |
| C | 195.589 | 138.249 | 132.878 |
| H | 196.326 | 137.523 | 132.515 |
| H | 195.509 | 139.042 | 132.127 |
| H | 195.991 | 138.700 | 133.793 |
| H | 194.466 | 136.753 | 133.870 |
| C | 193.652 | 136.866 | 131.911 |
| H | 192.644 | 136.516 | 132.166 |



|   |         |         |         |
|---|---------|---------|---------|
| H | 194.236 | 135.960 | 131.706 |
| C | 193.588 | 137.715 | 130.620 |
| H | 193.613 | 138.775 | 130.877 |
| H | 192.622 | 137.555 | 130.124 |
| C | 194.707 | 137.431 | 129.610 |
| H | 194.710 | 136.359 | 129.368 |
| H | 195.686 | 137.632 | 130.068 |
| C | 194.591 | 138.241 | 128.305 |
| C | 194.831 | 139.739 | 128.536 |
| H | 194.804 | 140.287 | 127.586 |
| H | 194.085 | 140.182 | 129.203 |
| H | 195.822 | 139.902 | 128.983 |
| H | 193.566 | 138.119 | 127.921 |
| C | 195.556 | 137.710 | 127.240 |
| H | 195.365 | 136.654 | 127.031 |
| H | 195.458 | 138.260 | 126.298 |
| H | 196.597 | 137.804 | 127.578 |

| <b>BChl a</b> | <b>(chain:0,resid:102)</b> |         |         |
|---------------|----------------------------|---------|---------|
| MG            | 185.050                    | 125.771 | 128.669 |
| N             | 185.167                    | 127.630 | 127.552 |
| C             | 185.617                    | 128.824 | 128.044 |
| C             | 185.779                    | 129.054 | 129.390 |
| C             | 186.164                    | 130.344 | 130.086 |
| C             | 186.011                    | 130.018 | 131.645 |
| C             | 185.635                    | 128.628 | 131.723 |
| C             | 185.368                    | 127.557 | 132.585 |
| C             | 185.282                    | 127.538 | 134.072 |
| H             | 184.500                    | 128.218 | 134.428 |
| H             | 185.045                    | 126.542 | 134.452 |
| H             | 186.218                    | 127.861 | 134.534 |
| O             | 186.236                    | 130.844 | 132.516 |
| C             | 185.282                    | 131.499 | 129.689 |
| O             | 184.125                    | 131.417 | 129.332 |

|   |         |         |         |
|---|---------|---------|---------|
| O | 185.941 | 132.676 | 129.747 |
| C | 185.118 | 133.790 | 129.383 |
| H | 185.743 | 134.674 | 129.495 |
| H | 184.246 | 133.857 | 130.033 |
| H | 184.765 | 133.663 | 128.356 |
| H | 187.206 | 130.637 | 129.924 |
| C | 185.512 | 128.122 | 130.401 |
| N | 185.175 | 126.830 | 130.382 |
| C | 185.112 | 126.444 | 131.706 |
| C | 184.795 | 125.130 | 132.079 |
| H | 184.856 | 124.925 | 133.135 |
| C | 184.375 | 124.101 | 131.260 |
| C | 183.790 | 122.803 | 131.798 |
| C | 183.440 | 122.016 | 130.518 |
| C | 182.016 | 121.451 | 130.489 |
| H | 181.900 | 120.669 | 131.244 |
| H | 181.779 | 121.018 | 129.513 |
| H | 181.283 | 122.234 | 130.704 |
| H | 184.139 | 121.182 | 130.424 |
| C | 184.712 | 122.030 | 132.745 |
| C | 184.034 | 120.807 | 133.365 |
| H | 184.714 | 120.269 | 134.031 |
| H | 183.704 | 120.103 | 132.597 |
| H | 183.151 | 121.092 | 133.945 |
| H | 185.073 | 122.693 | 133.542 |
| H | 185.592 | 121.722 | 132.164 |
| H | 182.866 | 123.053 | 132.336 |
| N | 184.323 | 124.144 | 129.894 |
| C | 183.773 | 123.002 | 129.412 |
| C | 183.535 | 122.735 | 128.073 |
| H | 183.116 | 121.767 | 127.840 |
| C | 183.683 | 123.595 | 126.979 |
| C | 183.202 | 123.314 | 125.638 |
| C | 183.357 | 124.489 | 124.908 |

|   |         |         |         |
|---|---------|---------|---------|
| C | 182.978 | 124.776 | 123.492 |
| H | 181.925 | 124.556 | 123.300 |
| H | 183.135 | 125.826 | 123.242 |
| H | 183.572 | 124.179 | 122.796 |
| C | 182.672 | 122.020 | 125.184 |
| O | 182.827 | 120.981 | 125.827 |
| C | 181.936 | 121.950 | 123.872 |
| H | 181.616 | 120.921 | 123.718 |
| H | 181.070 | 122.618 | 123.857 |
| H | 182.590 | 122.241 | 123.050 |
| N | 184.166 | 124.879 | 127.034 |
| C | 183.981 | 125.441 | 125.792 |
| C | 184.332 | 126.756 | 125.439 |
| H | 184.138 | 127.045 | 124.412 |
| C | 184.879 | 127.746 | 126.236 |
| C | 185.149 | 129.159 | 125.725 |
| C | 183.861 | 129.897 | 125.344 |
| H | 183.290 | 129.342 | 124.594 |
| H | 183.225 | 130.031 | 126.227 |
| H | 184.108 | 130.882 | 124.935 |
| H | 185.802 | 129.110 | 124.847 |
| C | 185.851 | 129.830 | 126.934 |
| H | 185.357 | 130.778 | 127.175 |
| C | 187.354 | 130.100 | 126.754 |
| H | 187.845 | 129.219 | 126.327 |
| H | 187.805 | 130.269 | 127.737 |
| C | 187.651 | 131.337 | 125.890 |
| H | 188.717 | 131.580 | 125.977 |
| H | 187.067 | 132.188 | 126.253 |
| C | 187.336 | 131.175 | 124.420 |
| O | 186.516 | 131.834 | 123.806 |
| O | 188.117 | 130.224 | 123.871 |
| C | 187.964 | 129.971 | 122.441 |
| H | 188.991 | 129.900 | 122.077 |

|   |         |         |         |
|---|---------|---------|---------|
| H | 187.481 | 130.837 | 121.996 |
| C | 187.216 | 128.705 | 122.195 |
| H | 187.757 | 127.794 | 122.440 |
| C | 185.963 | 128.588 | 121.726 |
| C | 185.063 | 129.749 | 121.392 |
| H | 184.574 | 129.604 | 120.422 |
| H | 184.267 | 129.825 | 122.143 |
| H | 185.577 | 130.711 | 121.389 |
| C | 185.372 | 127.208 | 121.579 |
| H | 184.467 | 127.141 | 122.196 |
| H | 186.072 | 126.484 | 122.005 |
| C | 185.006 | 126.729 | 120.158 |
| H | 185.800 | 127.005 | 119.451 |
| H | 184.095 | 127.232 | 119.812 |
| C | 184.817 | 125.198 | 120.185 |
| H | 184.442 | 124.933 | 121.177 |
| H | 185.807 | 124.725 | 120.109 |
| C | 183.863 | 124.572 | 119.154 |
| C | 182.424 | 125.077 | 119.338 |
| H | 181.736 | 124.515 | 118.701 |
| H | 182.085 | 124.967 | 120.375 |
| H | 182.322 | 126.134 | 119.067 |
| H | 184.193 | 124.861 | 118.144 |
| C | 183.913 | 123.025 | 119.224 |
| H | 184.896 | 122.674 | 118.877 |
| H | 183.177 | 122.630 | 118.513 |
| C | 183.645 | 122.448 | 120.624 |
| H | 182.824 | 123.004 | 121.086 |
| H | 184.525 | 122.625 | 121.256 |
| C | 183.305 | 120.952 | 120.674 |
| H | 183.369 | 120.616 | 121.715 |
| H | 184.072 | 120.384 | 120.127 |
| C | 181.922 | 120.574 | 120.112 |
| C | 180.757 | 121.353 | 120.732 |

|   |         |         |         |
|---|---------|---------|---------|
| H | 179.809 | 120.921 | 120.395 |
| H | 180.753 | 121.290 | 121.819 |
| H | 180.756 | 122.413 | 120.461 |
| H | 181.946 | 120.806 | 119.037 |
| C | 181.671 | 119.061 | 120.218 |
| H | 182.552 | 118.534 | 119.839 |
| H | 180.836 | 118.801 | 119.554 |
| C | 181.368 | 118.473 | 121.603 |
| H | 180.421 | 118.871 | 121.987 |
| H | 182.144 | 118.758 | 122.327 |
| C | 181.304 | 116.948 | 121.486 |
| H | 182.254 | 116.601 | 121.053 |
| H | 180.528 | 116.684 | 120.751 |
| C | 181.040 | 116.138 | 122.761 |
| C | 179.646 | 116.399 | 123.335 |
| H | 179.465 | 115.807 | 124.237 |
| H | 179.508 | 117.453 | 123.587 |
| H | 178.878 | 116.118 | 122.604 |
| H | 181.781 | 116.433 | 123.519 |
| C | 181.207 | 114.652 | 122.433 |
| H | 182.246 | 114.379 | 122.224 |
| H | 180.848 | 114.013 | 123.244 |
| H | 180.626 | 114.417 | 121.533 |

**BChl a** (in *vacuo*)

|    |        |        |        |
|----|--------|--------|--------|
| MG | 3.522  | -1.125 | -0.020 |
| H  | 5.984  | 7.403  | -1.906 |
| H  | 7.116  | 6.024  | -2.106 |
| C  | 6.273  | 6.420  | -1.534 |
| O  | 5.116  | 5.588  | -1.710 |
| H  | 6.551  | 6.471  | -0.478 |
| O  | 4.184  | 3.857  | -4.115 |
| H  | -4.040 | 4.243  | 3.767  |

|   |         |       |        |
|---|---------|-------|--------|
| O | 0.043   | 5.022 | 1.624  |
| C | 5.264   | 4.309 | -1.322 |
| H | 3.153   | 4.163 | -1.532 |
| H | 2.550   | 4.495 | 0.717  |
| H | -2.281  | 4.296 | 0.901  |
| H | -2.345  | 4.335 | 2.662  |
| O | 6.266   | 3.870 | -0.797 |
| C | 4.045   | 3.077 | -3.195 |
| H | -5.708  | 4.066 | 3.207  |
| C | 4.023   | 3.507 | -1.654 |
| C | -4.818  | 3.512 | 3.536  |
| H | -5.095  | 3.005 | 4.469  |
| H | 2.689   | 4.563 | 2.459  |
| C | -2.258  | 3.669 | 1.801  |
| H | 3.847   | 1.454 | -5.921 |
| C | 0.110   | 3.815 | 1.728  |
| C | 2.637   | 3.870 | 1.611  |
| H | 4.774   | 3.746 | 1.364  |
| O | -0.965  | 3.010 | 1.847  |
| H | 5.920   | 3.336 | 3.593  |
| C | 3.860   | 1.632 | -3.195 |
| H | -8.801  | 0.444 | 3.594  |
| C | -4.408  | 2.504 | 2.492  |
| C | 1.386   | 3.001 | 1.732  |
| C | 3.947   | 3.055 | 1.553  |
| C | -3.291  | 2.592 | 1.757  |
| C | 3.723   | 0.451 | -5.505 |
| C | 3.900   | 2.195 | -0.890 |
| H | 2.787   | 0.031 | -5.895 |
| H | 1.325   | 2.288 | 0.901  |
| H | -8.878  | 1.526 | 2.192  |
| H | -11.099 | 0.482 | 2.711  |
| C | 3.720   | 0.511 | -4.011 |

|   |         |        |        |
|---|---------|--------|--------|
| H | 4.539   | -0.178 | -5.881 |
| H | 6.354   | 2.033  | 2.471  |
| C | 3.793   | 1.180  | -1.853 |
| C | -8.971  | 0.481  | 2.512  |
| C | 5.679   | 2.311  | 3.288  |
| C | 3.897   | 1.988  | 0.475  |
| H | -6.405  | 1.787  | 2.272  |
| H | 1.397   | 2.390  | 2.642  |
| H | -3.080  | 1.826  | 1.015  |
| C | 4.215   | 2.219  | 2.828  |
| C | -5.394  | 1.360  | 2.348  |
| C | -10.348 | -0.091 | 2.149  |
| H | 3.564   | 2.530  | 3.653  |
| H | -5.396  | 0.807  | 3.300  |
| H | -10.662 | 1.180  | 0.431  |
| H | -10.335 | -1.652 | 3.672  |
| H | -8.163  | -0.087 | 2.036  |
| H | 5.872   | 1.645  | 4.135  |
| H | -5.071  | 1.954  | -0.296 |
| C | 3.567   | -0.598 | -3.097 |
| N | 3.621   | -0.153 | -1.783 |
| H | -6.614  | 1.127  | -0.207 |
| N | 3.785   | 0.735  | 1.023  |
| C | -10.465 | -1.556 | 2.588  |
| C | -10.682 | 0.103  | 0.656  |
| H | -11.445 | -1.973 | 2.329  |
| C | 3.876   | 0.805  | 2.376  |
| C | -5.529  | 0.963  | -0.183 |
| C | -5.180  | 0.377  | 1.192  |
| H | -8.723  | -0.324 | -0.155 |
| H | -11.717 | -0.224 | 0.482  |
| H | -4.147  | 0.011  | 1.214  |
| H | -5.443  | 1.602  | -2.868 |

|   |         |        |        |
|---|---------|--------|--------|
| H | 3.318   | -2.213 | -4.465 |
| H | -9.700  | -2.180 | 2.111  |
| C | -9.763  | -0.621 | -0.335 |
| H | -7.736  | 1.082  | -2.004 |
| H | -3.193  | 1.063  | -1.742 |
| C | 3.369   | -1.956 | -3.410 |
| H | -5.809  | -0.506 | 1.366  |
| C | 3.733   | -0.255 | 3.260  |
| H | -9.806  | -1.705 | -0.163 |
| H | -10.018 | 0.746  | -1.987 |
| H | 3.831   | 0.007  | 4.309  |
| C | -5.105  | 0.085  | -1.374 |
| C | -5.746  | 0.560  | -2.694 |
| C | -3.578  | 0.057  | -1.531 |
| H | -3.074  | -0.310 | -0.631 |
| C | -7.277  | 0.462  | -2.782 |
| C | -10.134 | -0.329 | -1.792 |
| C | 3.220   | -3.000 | -2.515 |
| H | -7.591  | 0.902  | -3.737 |
| H | -11.202 | -0.544 | -1.938 |
| H | -7.504  | -1.407 | -1.722 |
| H | -5.440  | -0.943 | -1.176 |
| N | 3.266   | -2.902 | -1.149 |
| H | -5.313  | -0.024 | -3.519 |
| C | 3.494   | -1.612 | 2.989  |
| N | 3.390   | -2.159 | 1.729  |
| H | -3.280  | -0.592 | -2.363 |
| H | 1.415   | -3.822 | -4.361 |
| C | -7.806  | -0.974 | -2.683 |
| C | -9.334  | -1.131 | -2.834 |
| H | 3.663   | -4.757 | -3.698 |
| C | 2.931   | -4.432 | -2.947 |
| H | 3.372   | -1.385 | 5.730  |



|   |         |        |        |
|---|---------|--------|--------|
| H | -9.665  | 0.270  | -4.483 |
| C | 1.523   | -4.565 | -3.561 |
| C | 3.143   | -4.125 | -0.578 |
| H | -9.554  | -2.196 | -2.661 |
| H | -7.315  | -1.586 | -3.453 |
| H | 0.779   | -4.302 | -2.797 |
| C | 3.183   | -3.511 | 1.871  |
| C | 3.347   | -2.645 | 3.982  |
| C | -9.809  | -0.792 | -4.253 |
| C | 3.394   | -2.445 | 5.463  |
| C | 3.093   | -4.397 | 0.783  |
| H | -10.878 | -1.009 | -4.370 |
| C | 3.105   | -5.227 | -1.630 |
| H | 5.267   | -5.444 | -1.778 |
| H | 4.297   | -2.895 | 5.889  |
| H | -9.263  | -1.374 | -5.006 |
| C | 3.143   | -3.838 | 3.290  |
| C | 1.241   | -5.962 | -4.119 |
| H | 1.958   | -6.220 | -4.907 |
| H | 0.235   | -6.018 | -4.548 |
| H | 2.555   | -2.950 | 5.951  |
| H | 2.247   | -5.886 | -1.452 |
| C | 4.387   | -6.073 | -1.603 |
| H | 2.985   | -5.445 | 1.022  |
| H | 4.355   | -6.843 | -2.383 |
| H | 1.312   | -6.731 | -3.342 |
| H | 4.516   | -6.570 | -0.636 |
| C | 2.910   | -5.126 | 3.972  |
| H | 1.561   | -6.075 | 2.540  |
| O | 3.112   | -5.234 | 5.179  |
| C | 2.384   | -6.335 | 3.212  |
| H | 3.183   | -6.787 | 2.610  |
| H | 2.050   | -7.073 | 3.944  |

| <b>BChl a</b> | <b>(in acetone)</b> |        |        |
|---------------|---------------------|--------|--------|
| MG            | 2.396               | 0.248  | 0.784  |
| H             | -0.457              | -7.889 | 3.582  |
| H             | 0.798               | -7.005 | 4.51   |
| C             | 0.367               | -7.179 | 3.522  |
| O             | -0.209              | -5.963 | 3.006  |
| H             | 1.144               | -7.547 | 2.846  |
| O             | -1.449              | -3.468 | 4.452  |
| H             | -4.505              | -2.728 | -3.252 |
| O             | -2.202              | -3.372 | -2.157 |
| C             | 0.642               | -4.936 | 2.852  |
| H             | -0.937              | -4.011 | 1.765  |
| H             | -0.39               | -4.426 | -0.508 |
| H             | -3.087              | -3.727 | -4.353 |
| H             | -2.096              | -3.577 | -5.825 |
| O             | 1.833               | -5.001 | 3.092  |
| C             | -0.7                | -2.936 | 3.647  |
| H             | -4.597              | -1.187 | -2.393 |
| C             | -0.089              | -3.696 | 2.383  |
| C             | -4.647              | -1.656 | -3.384 |
| H             | -5.662              | -1.475 | -3.762 |
| H             | 0.621               | -5.206 | -1.722 |
| C             | -2.33               | -3.13  | -4.858 |
| H             | -1.827              | -0.527 | 5.587  |
| C             | -1.158              | -3.262 | -2.775 |
| C             | 0.484               | -4.28  | -1.15  |
| H             | 1.881               | -4.946 | 0.346  |
| O             | -1.068              | -3.239 | -4.116 |
| H             | 4.178               | -5.5   | -0.579 |
| C             | -0.186              | -1.583 | 3.58   |
| H             | -7.526              | 1.588  | -3.218 |
| C             | -3.637              | -1.022 | -4.301 |

|   |        |        |        |
|---|--------|--------|--------|
| C | 0.195  | -3.121 | -2.116 |
| C | 1.735  | -4.056 | -0.274 |
| C | -2.683 | -1.682 | -4.974 |
| C | -0.932 | 0.084  | 5.435  |
| C | 0.8    | -2.663 | 1.704  |
| H | -1.231 | 1.136  | 5.418  |
| H | 0.165  | -2.177 | -1.558 |
| H | -6.644 | 0.374  | -2.274 |
| H | -8.679 | 1.215  | -1.074 |
| C | -0.224 | -0.318 | 4.181  |
| H | -0.287 | -0.059 | 6.312  |
| H | 4.383  | -4.148 | 0.553  |
| C | 0.672  | -1.478 | 2.454  |
| C | -6.942 | 1.428  | -2.303 |
| C | 4.263  | -4.41  | -0.505 |
| C | 1.594  | -2.813 | 0.586  |
| H | -4.623 | 0.856  | -3.931 |
| H | 0.968  | -3.029 | -2.881 |
| H | -2.008 | -1.106 | -5.607 |
| C | 3.013  | -3.735 | -1.09  |
| C | -3.698 | 0.495  | -4.394 |
| C | -7.753 | 1.81   | -1.058 |
| H | 2.908  | -4.032 | -2.139 |
| H | -3.727 | 0.809  | -5.444 |
| H | -6.866 | 0.352  | 0.267  |
| H | -8.773 | 3.499  | -1.986 |
| H | -6.031 | 2.031  | -2.385 |
| H | 5.166  | -4.097 | -1.039 |
| H | -2.119 | -0.363 | -2.229 |
| C | 0.616  | 0.511  | 3.349  |
| N | 1.166  | -0.239 | 2.319  |
| H | -3.221 | 0.899  | -1.707 |
| N | 2.348  | -1.783 | 0.082  |

|   |        |        |        |
|---|--------|--------|--------|
| C | -8.16  | 3.289  | -1.102 |
| C | -7.023 | 1.441  | 0.249  |
| H | -8.741 | 3.568  | -0.214 |
| C | 3.107  | -2.22  | -0.953 |
| C | -2.287 | 0.723  | -2.256 |
| C | -2.486 | 1.163  | -3.71  |
| H | -4.988 | 1.88   | -0.339 |
| H | -7.686 | 1.669  | 1.096  |
| H | -1.59  | 0.924  | -4.293 |
| H | -0.649 | -0.208 | -0.182 |
| H | 0.354  | 2.418  | 4.27   |
| H | -7.282 | 3.944  | -1.147 |
| C | -5.674 | 2.133  | 0.479  |
| H | -3.009 | 0.321  | 0.423  |
| H | 0.491  | 0.256  | -2.397 |
| C | 0.836  | 1.903  | 3.445  |
| H | -2.608 | 2.255  | -3.754 |
| C | 3.895  | -1.427 | -1.779 |
| H | -5.801 | 3.223  | 0.448  |
| H | -4.841 | 0.664  | 1.829  |
| H | 4.414  | -1.959 | -2.569 |
| C | -1.134 | 1.417  | -1.512 |
| C | -0.966 | 0.842  | -0.094 |
| C | 0.206  | 1.308  | -2.255 |
| H | 0.173  | 1.78   | -3.242 |
| C | -2.183 | 0.912  | 0.837  |
| C | -5.041 | 1.745  | 1.818  |
| C | 1.564  | 2.694  | 2.573  |
| H | -1.906 | 0.429  | 1.781  |
| H | -5.772 | 1.923  | 2.62   |
| H | -2.978 | 2.804  | 0.165  |
| H | -1.379 | 2.486  | -1.429 |
| N | 2.259  | 2.255  | 1.476  |

|   |        |        |        |
|---|--------|--------|--------|
| H | -0.142 | 1.374  | 0.398  |
| C | 4.087  | -0.034 | -1.744 |
| N | 3.574  | 0.811  | -0.788 |
| H | 1.005  | 1.793  | -1.684 |
| H | -0.461 | 4.419  | 3.148  |
| C | -2.642 | 2.35   | 1.104  |
| C | -3.751 | 2.51   | 2.163  |
| H | 1.996  | 4.489  | 3.696  |
| C | 1.642  | 4.211  | 2.695  |
| H | 5.196  | -0.846 | -4.136 |
| H | -3.032 | 1.056  | 3.627  |
| C | 0.271  | 4.876  | 2.471  |
| C | 2.88   | 3.285  | 0.858  |
| H | -4.007 | 3.581  | 2.187  |
| H | -1.771 | 2.936  | 1.428  |
| H | -0.069 | 4.65   | 1.451  |
| C | 3.947  | 2.093  | -1.104 |
| C | 4.842  | 0.728  | -2.71  |
| C | -3.257 | 2.126  | 3.563  |
| C | 5.547  | 0.162  | -3.901 |
| C | 3.632  | 3.212  | -0.313 |
| H | -4.014 | 2.35   | 4.324  |
| C | 2.692  | 4.59   | 1.62   |
| H | 4.442  | 4.355  | 2.896  |
| H | 6.629  | 0.114  | -3.729 |
| H | -2.342 | 2.672  | 3.822  |
| C | 4.746  | 2.064  | -2.325 |
| C | 0.295  | 6.389  | 2.697  |
| H | 0.604  | 6.625  | 3.722  |
| H | -0.696 | 6.825  | 2.533  |
| H | 5.407  | 0.799  | -4.777 |
| H | 2.298  | 5.357  | 0.943  |
| C | 4.013  | 5.099  | 2.215  |

|   |       |       |        |
|---|-------|-------|--------|
| H | 4.034 | 4.161 | -0.639 |
| H | 3.844 | 6.022 | 2.78   |
| H | 0.994 | 6.889 | 2.016  |
| H | 4.75  | 5.306 | 1.432  |
| C | 5.33  | 3.171 | -3.102 |
| H | 3.739 | 4.633 | -2.79  |
| O | 6.217 | 2.952 | -3.93  |
| C | 4.822 | 4.592 | -2.931 |
| H | 5.295 | 5.062 | -2.06  |
| H | 5.106 | 5.166 | -3.816 |

## REFERENCES

- (1) Tomasi, J.; Mennucci, B.; Cammi, R. Quantum Mechanical Continuum Solvation Models. *Chem. Rev.* **2005**, *105*, 2999-3094.
- (2) Cogdell, R. J.; Gall, A.; Köhler, J. The architecture and function of the light-harvesting apparatus of purple bacteria: from single molecules to *in vivo* membranes. *Q. Rev. Biophys.* **2006**, *39*, 227-324.
- (3) Tani, K.; Kanno, R.; Ji, X.-C.; Hall, M.; Yu, L.-J.; Kimura, Y.; Madigan, M. T.; Mizoguchi, A.; Humbel, B. M.; Wang-Otomo, Z.-Y. Cryo-EM Structure of the Photosynthetic LH1-RC Complex from *Rhodospirillum rubrum*. *Biochemistry* **2021**, *60*, 2483-2491.
- (4) Papiz, M. Z.; Prince, S. M.; Howard, T.; Cogdell, R. J.; Isaacs, N. W. The Structure and Thermal Motion of the B800–850 LH2 Complex from *Rps. acidophila* at 2.0 Å Resolution and 100 K: New Structural Features and Functionally Relevant Motions. *J. Mol. Biol.* **2003**, *326*, 1523-1538.
